# Supplementary material for: Sterically hindered phenanthroimidazole ligands drive the structural flexibility and facile ligand exchange in cyclometalated iridium(iii) complexes
Source: Royal Society of Chemistry journal article supplement (doi:10.1039/d1dt00820j), 2021-01-01
Supplement: d1dt00820j1.pdf [file d1dt00820j1.pdf]

Supporting Information

**Sterically hindered phenanthroimidazole ligands drive the structural flexibility and unprecedented lability of cyclometalated iridium(III) complexes**

Sergei V. Tatarin, Paulina Kalle, Ilya V. Taydakov, Evgenia A. Varaksina, Vladislav M. Korshunov and Stanislav I. Bezzubov

1. NMR and HRMS spectra.
2. X-ray data.
3. Redox and optical properties
4. Computational details

# 1. NMR and mass spectra.

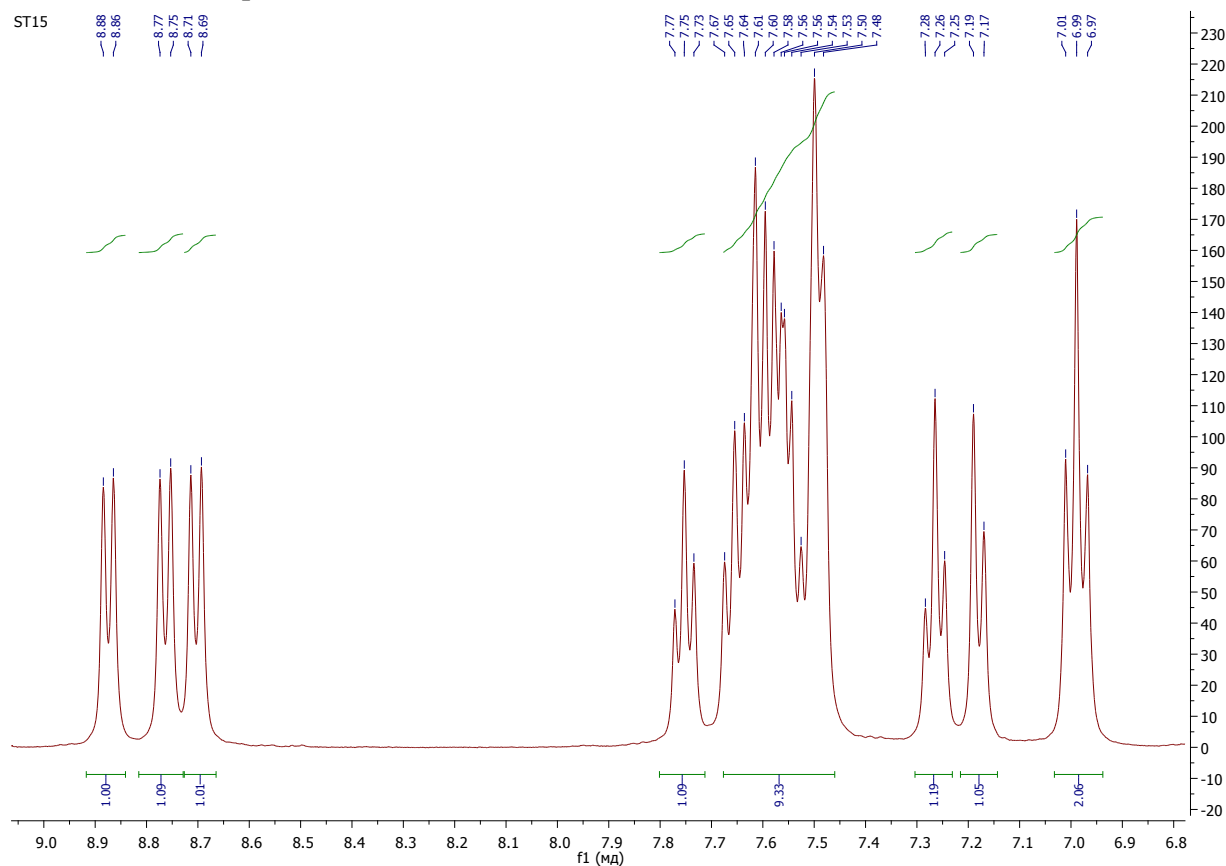

Figure S1.  $^1\text{H}$  NMR spectrum of fphi (400 MHz, 298K,  $\text{CDCl}_3$ ).

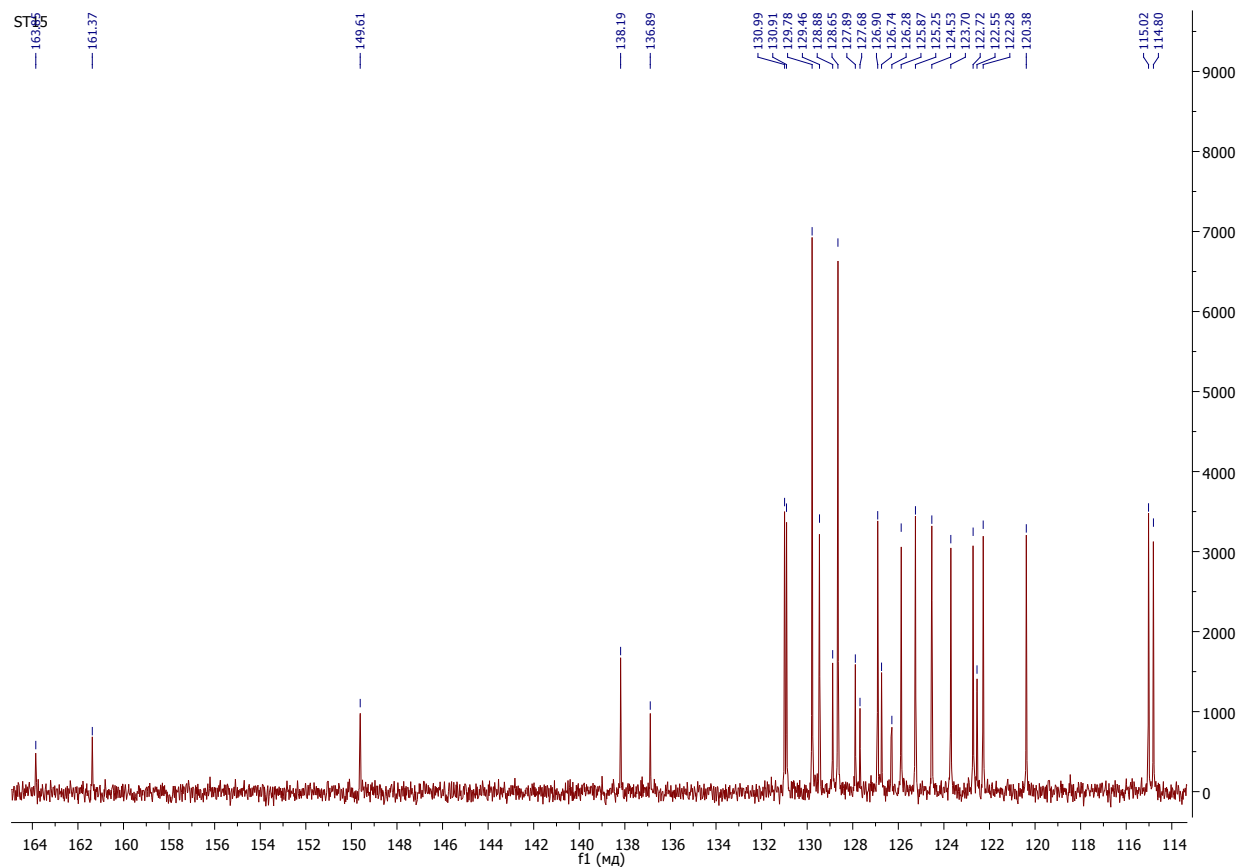

Figure S2.  $^{13}\text{C}$   $\{^1\text{H}\}$  NMR spectrum of fphi (101 MHz, 298K,  $\text{CDCl}_3$ ).

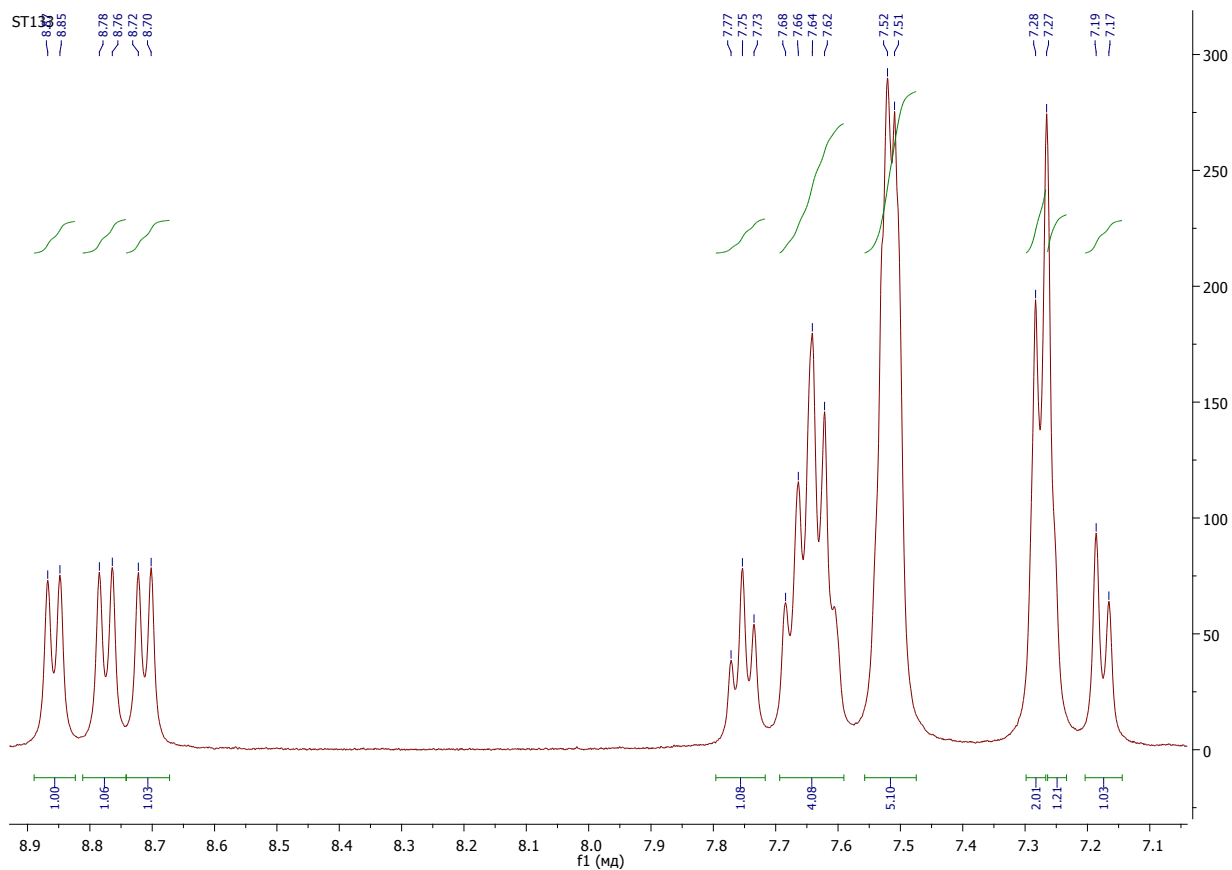

Figure S3.  $^1\text{H}$  NMR spectrum of cphi (400 MHz, 298K,  $\text{CDCl}_3$ ).

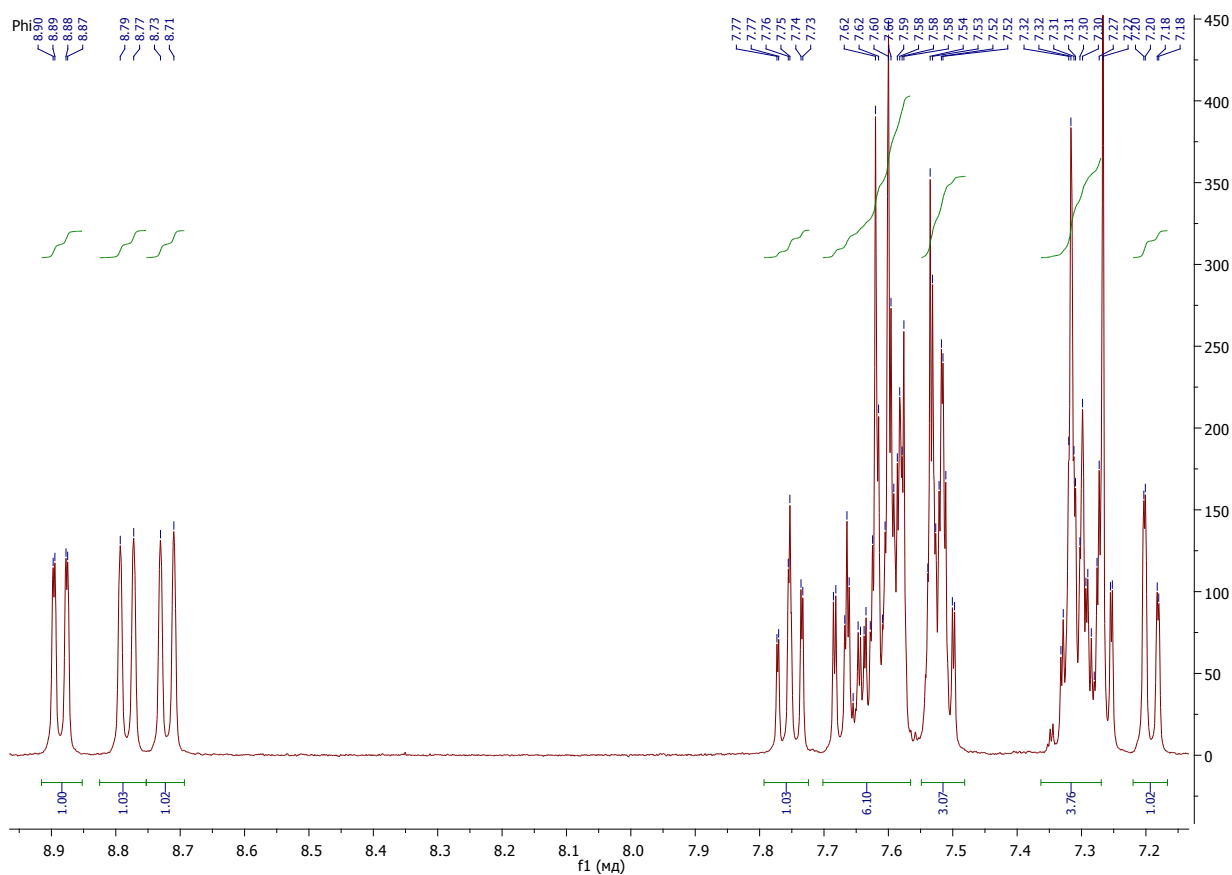

Figure S4.  $^1\text{H}$  NMR spectrum of phi (400 MHz, 298K,  $\text{CDCl}_3$ ).

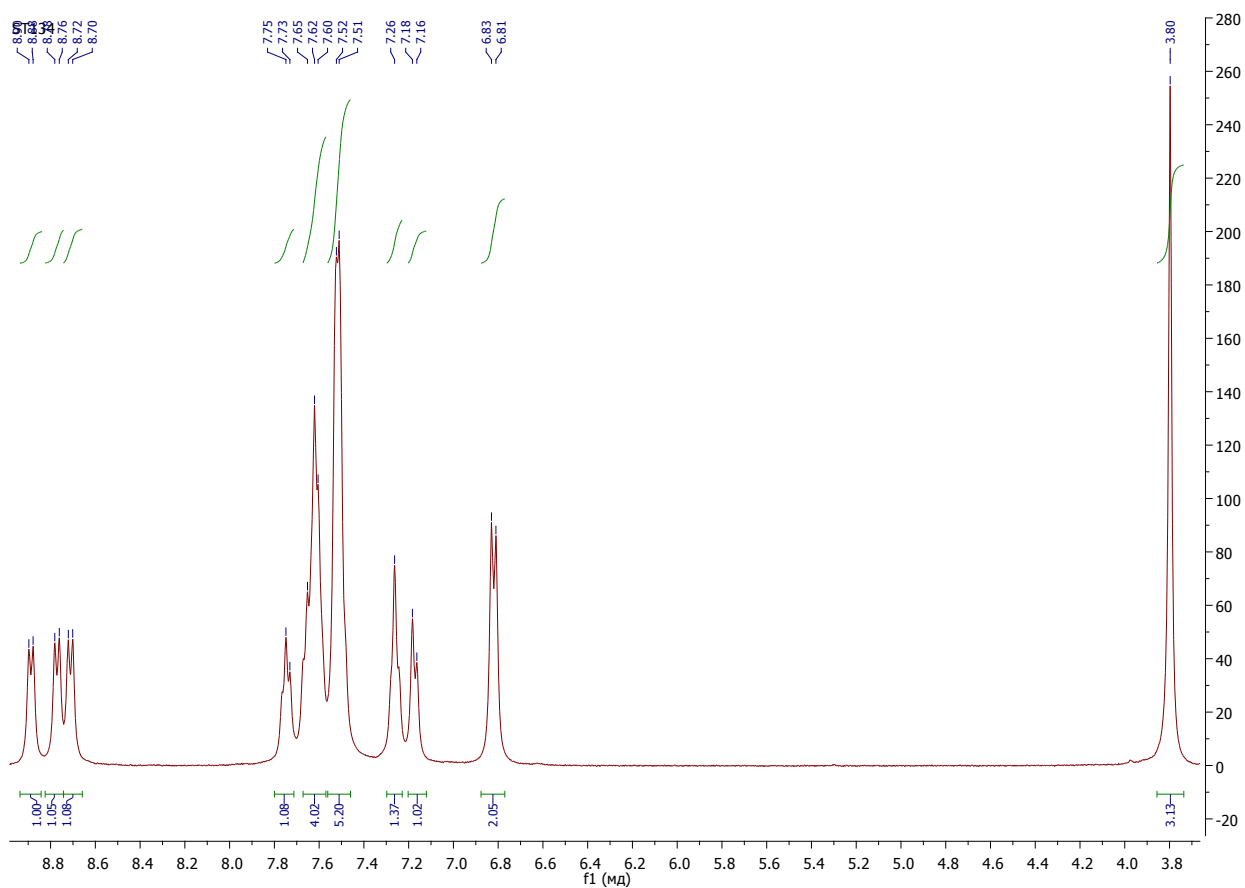

Figure S5.  $^1\text{H}$  NMR spectrum of mphi (400 MHz, 298K,  $\text{CDCl}_3$ ).

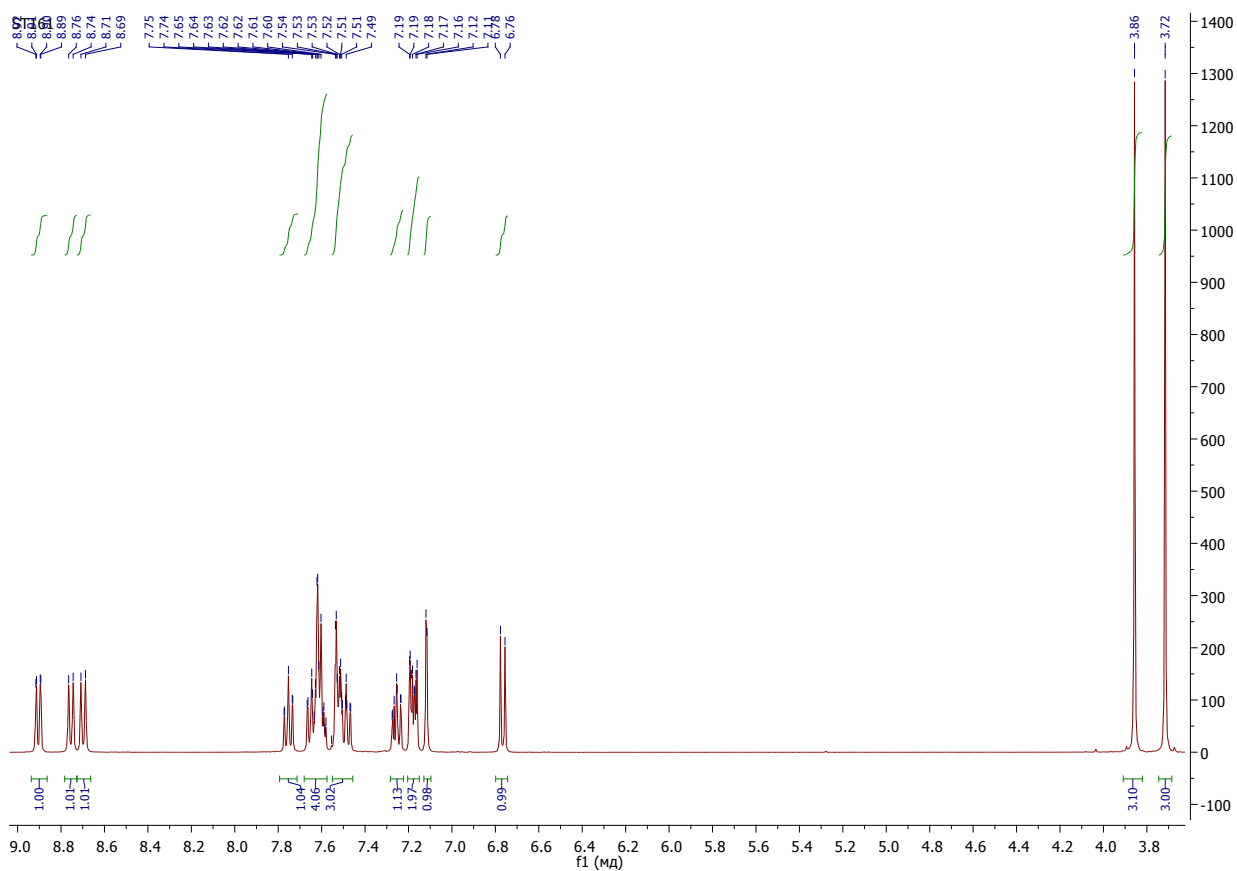

Figure S6.  $^1\text{H}$  NMR spectrum of dmphi (400 MHz, 298K,  $\text{CDCl}_3$ ).

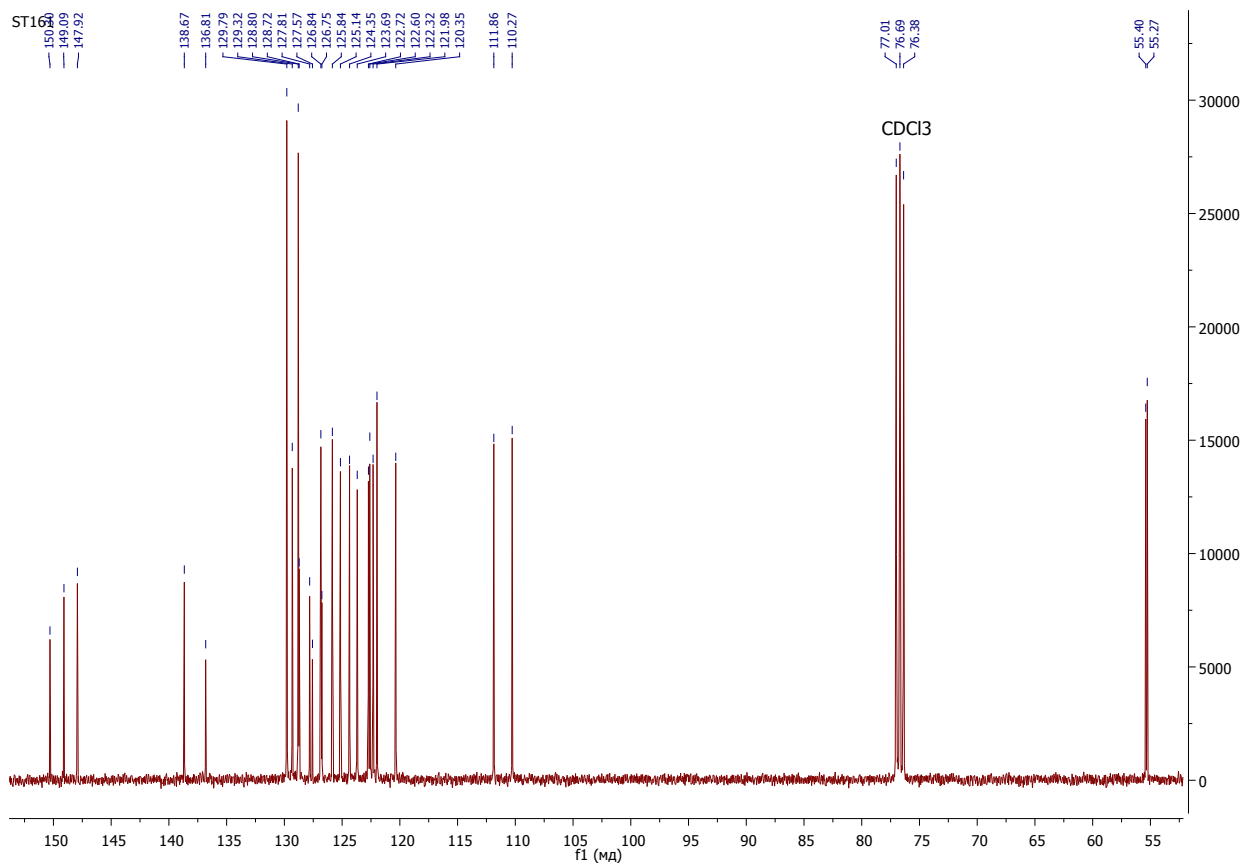

Figure S7.  $^{13}\text{C}$   $\{^1\text{H}\}$  NMR spectrum of dmphi (101 MHz, 298K,  $\text{CDCl}_3$ ).

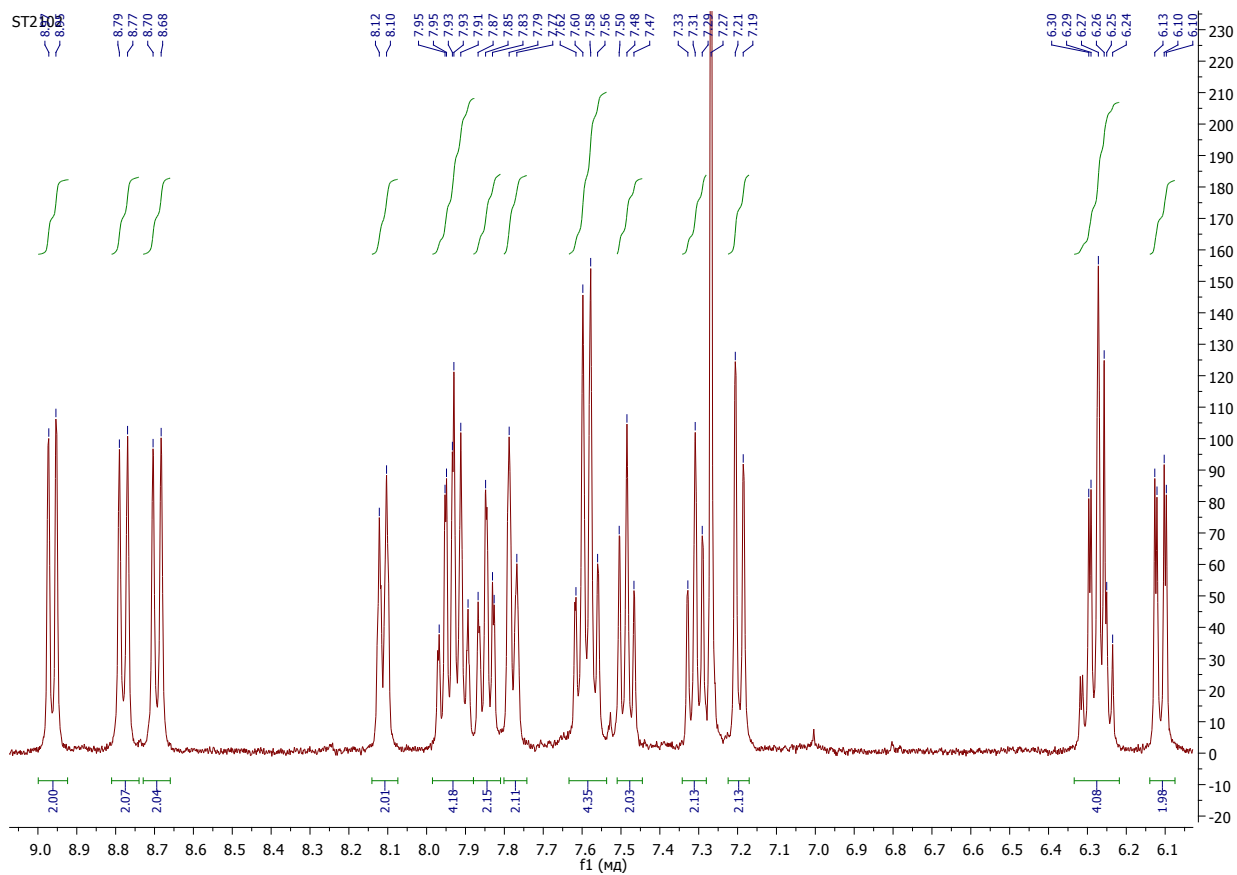

Figure S8.  $^1\text{H}$  NMR spectrum of  $[\text{Ir}(\text{phi})_2\text{Cl}]_2$  (400 MHz, 298K,  $\text{CDCl}_3$ ).

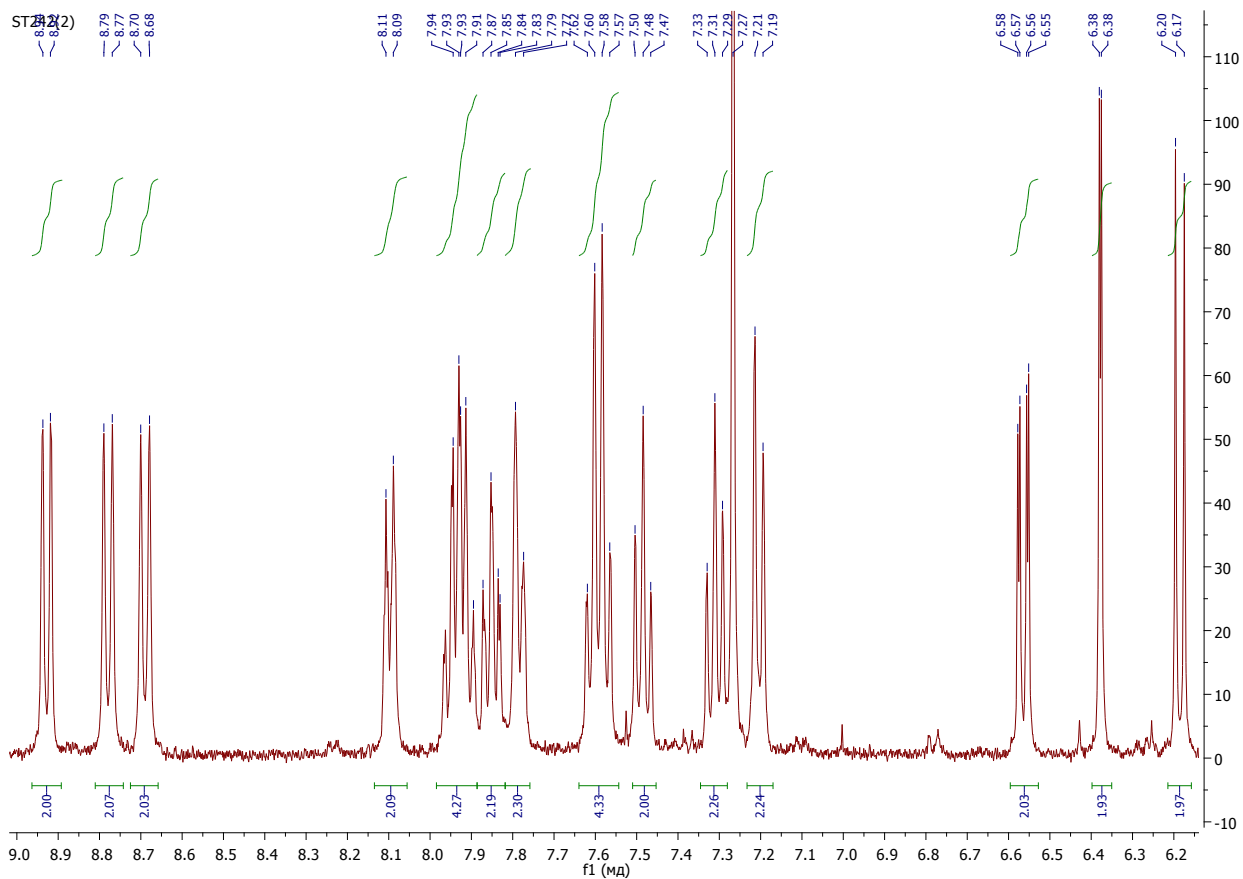

Figure S9.  $^1\text{H}$  NMR spectrum of  $[\text{Ir}(\text{phi})_2\text{Cl}]_2$  (400 MHz, 298K,  $\text{CDCl}_3$ ).

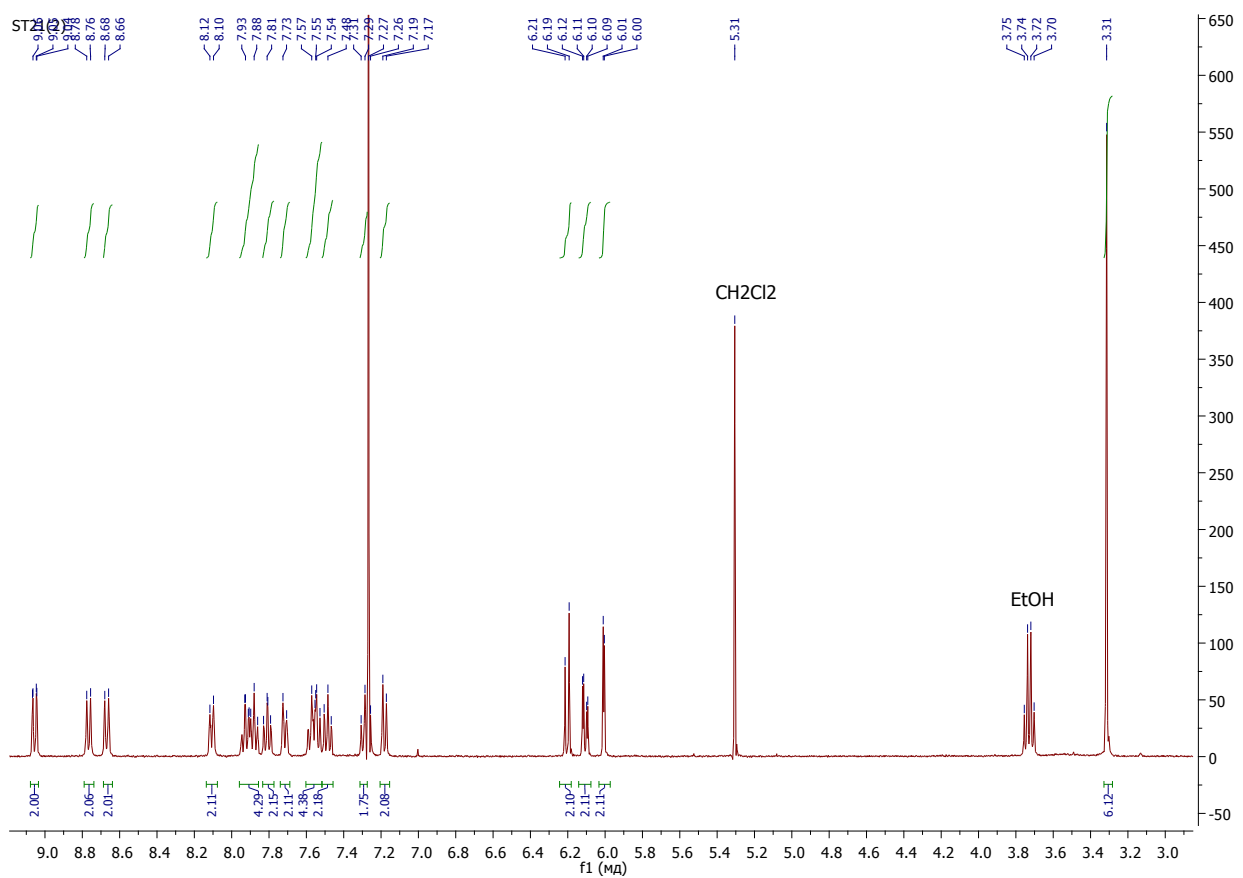

Figure S10.  $^1\text{H}$  NMR spectrum of  $[\text{Ir}(\text{mphi})_2\text{Cl}]_2$  (400 MHz, 298K,  $\text{CDCl}_3$ ).

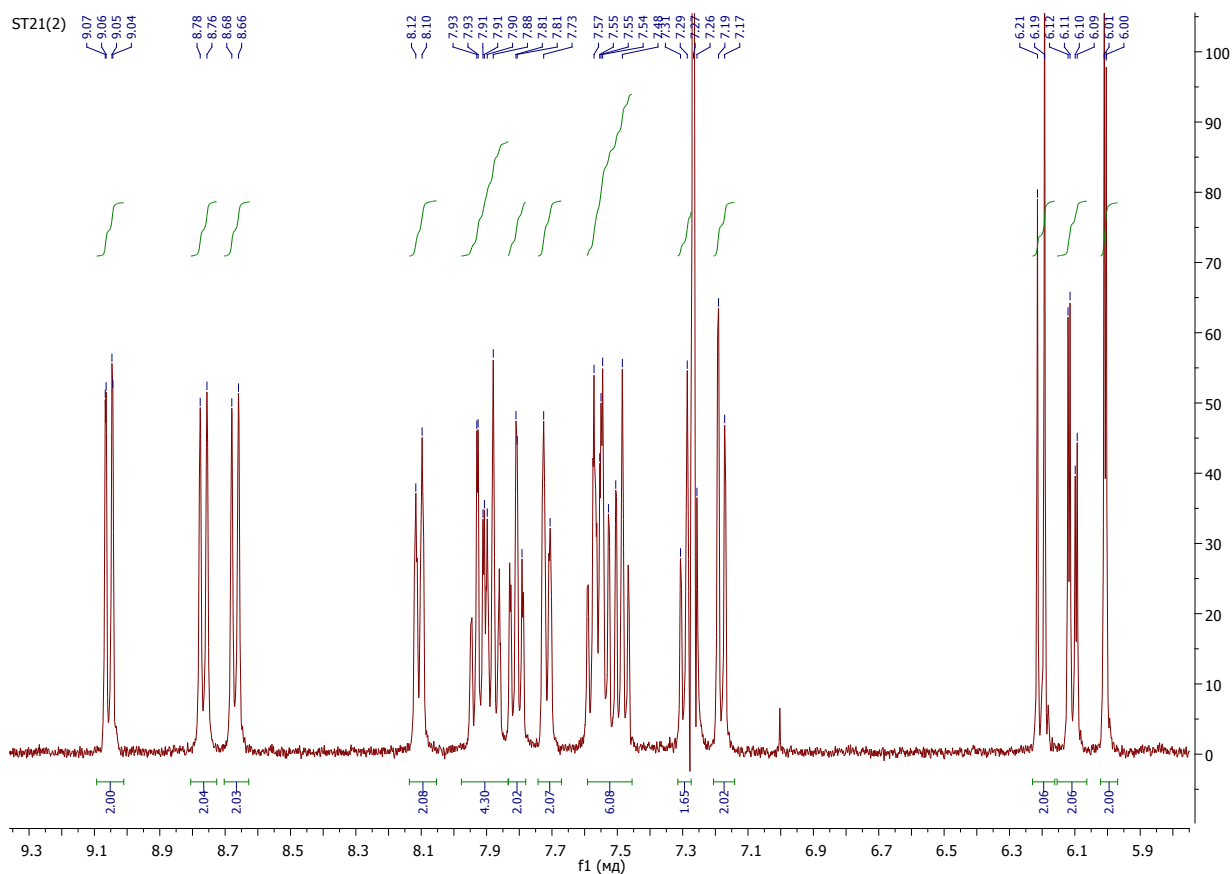

Figure S11. Aromatic region of  $^1\text{H}$  NMR spectrum of  $[\text{Ir}(\text{mphi})_2\text{Cl}]_2$  (400 MHz, 298K,  $\text{CDCl}_3$ ).

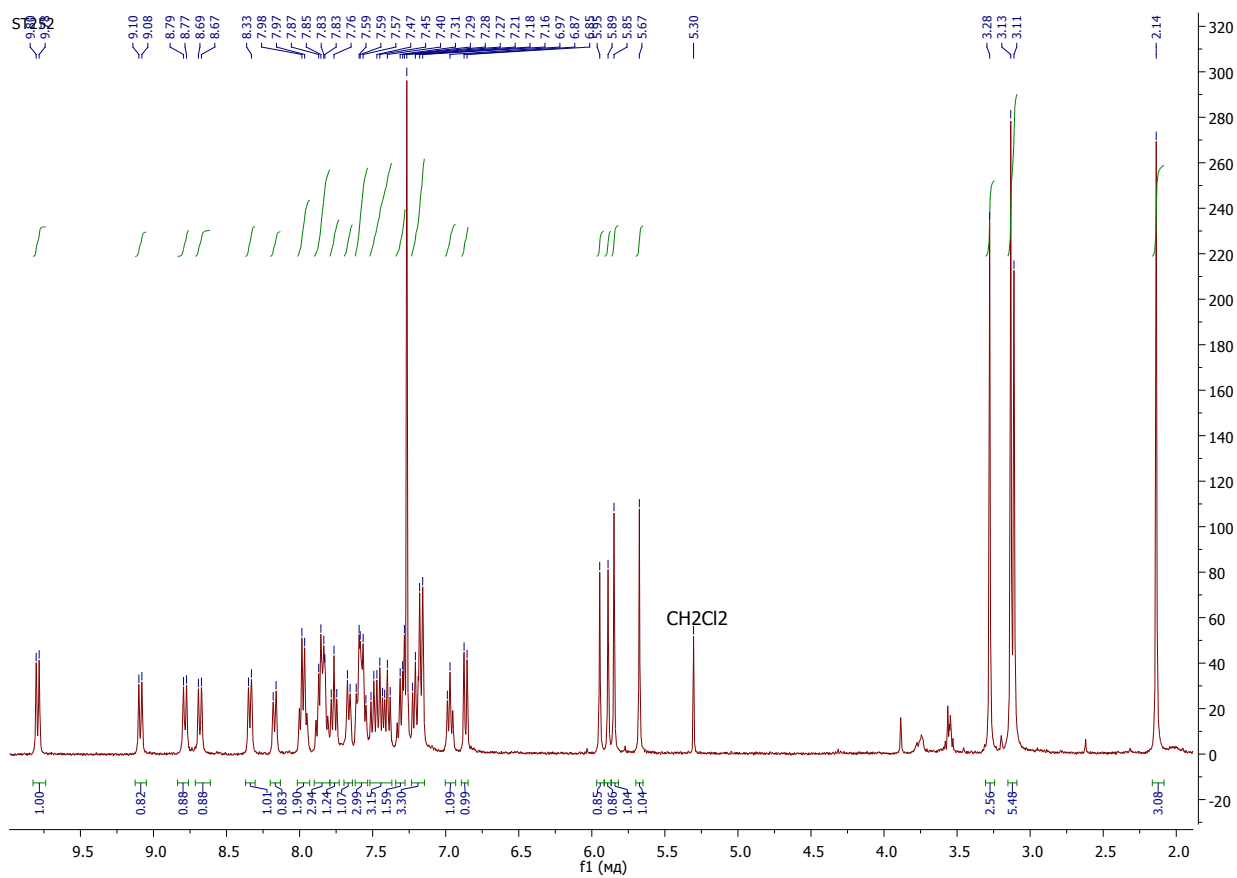

Figure S12.  $^1\text{H}$  NMR spectrum of  $[\text{Ir}(\text{dmphi})_2\text{Cl}]_2$  (400 MHz, 298K,  $\text{CDCl}_3$ ).

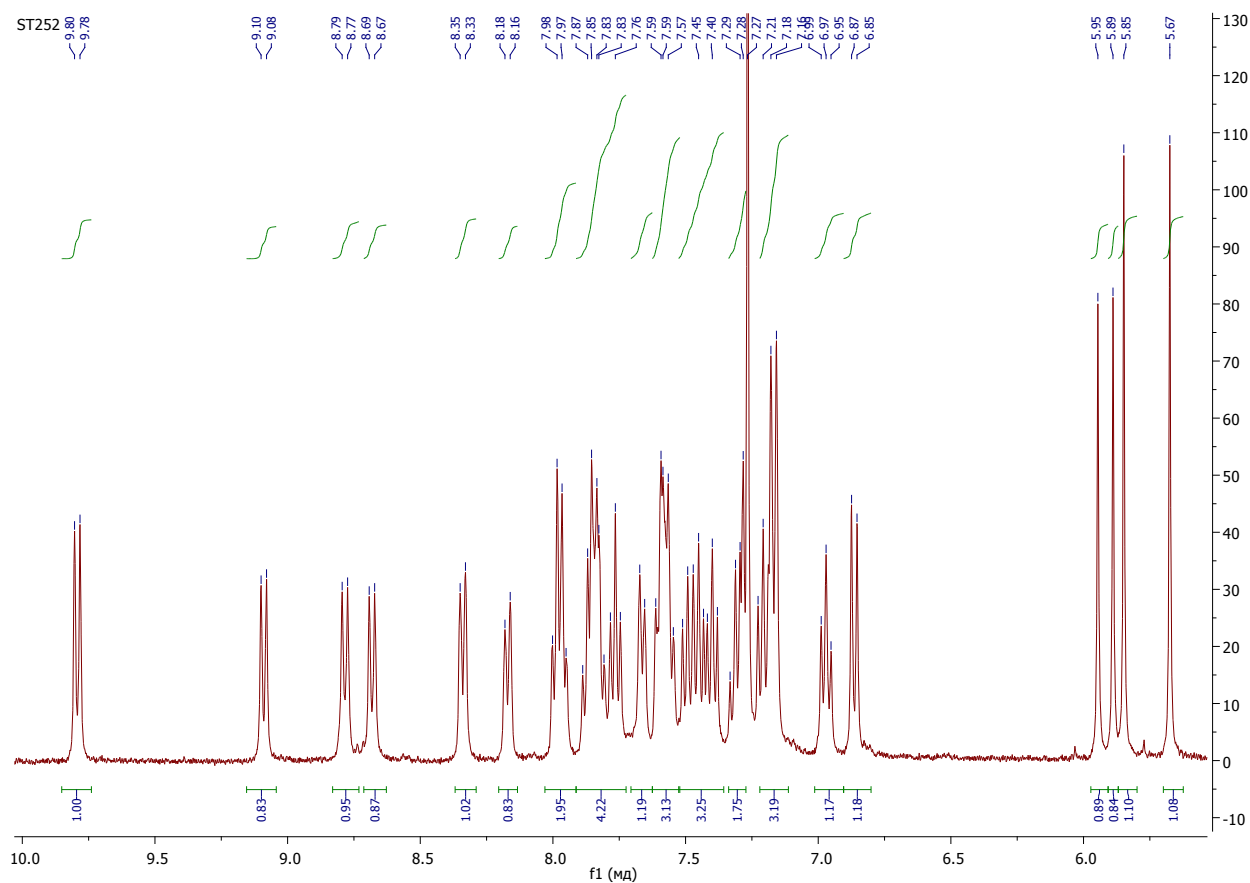

Figure S13. Aromatic region of  $^1\text{H}$  NMR spectrum of  $[\text{Ir}(\text{dmphi})_2\text{Cl}]_2$  (400 MHz, 298K,  $\text{CDCl}_3$ ).

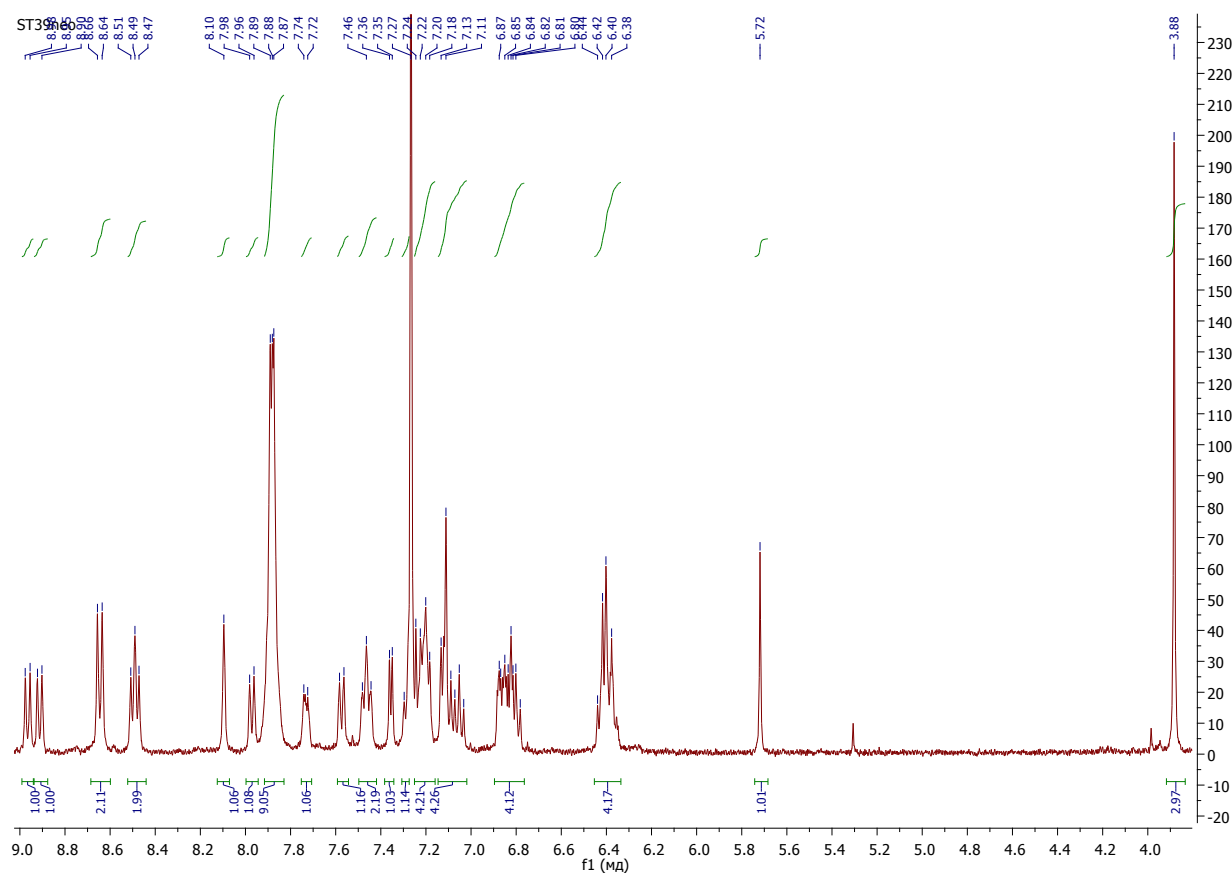

Figure S14.  $^1\text{H}$  NMR spectrum of **1** (400 MHz, 298K,  $\text{CDCl}_3$ ).



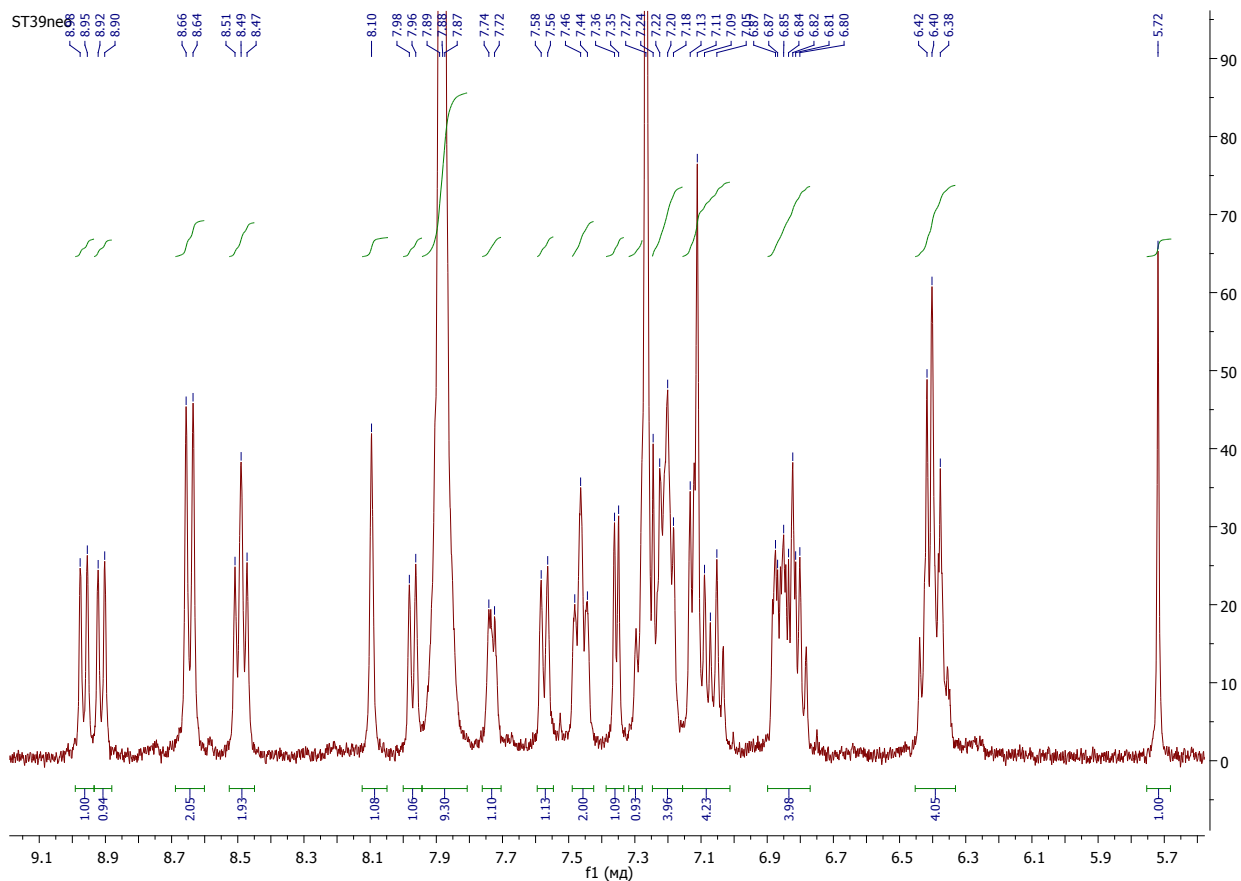

Figure S15. Aromatic region of  $^1\text{H}$  NMR spectrum of **1** (400 MHz, 298K,  $\text{CDCl}_3$ ).

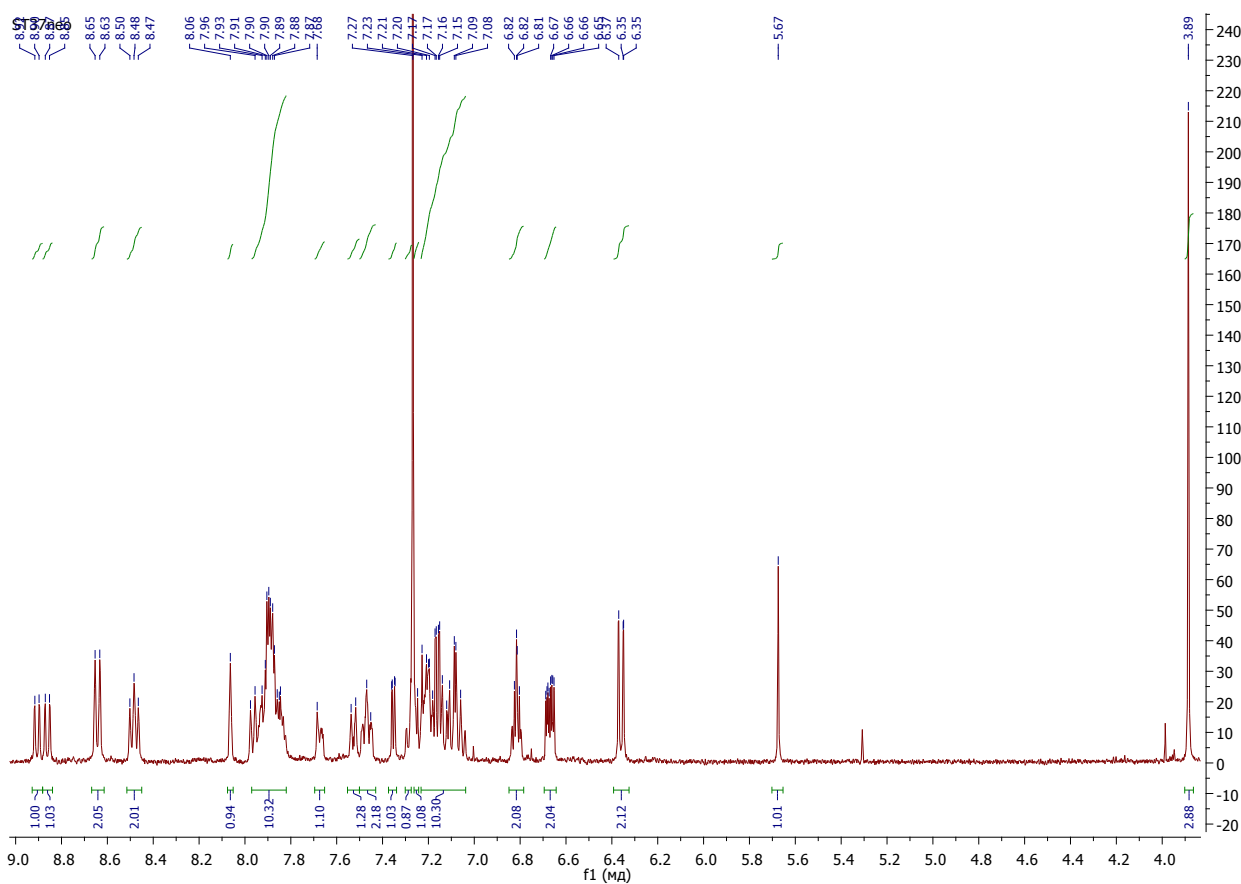

Figure S16.  $^1\text{H}$  NMR spectrum of **2** (400 MHz, 298K,  $\text{CDCl}_3$ ).

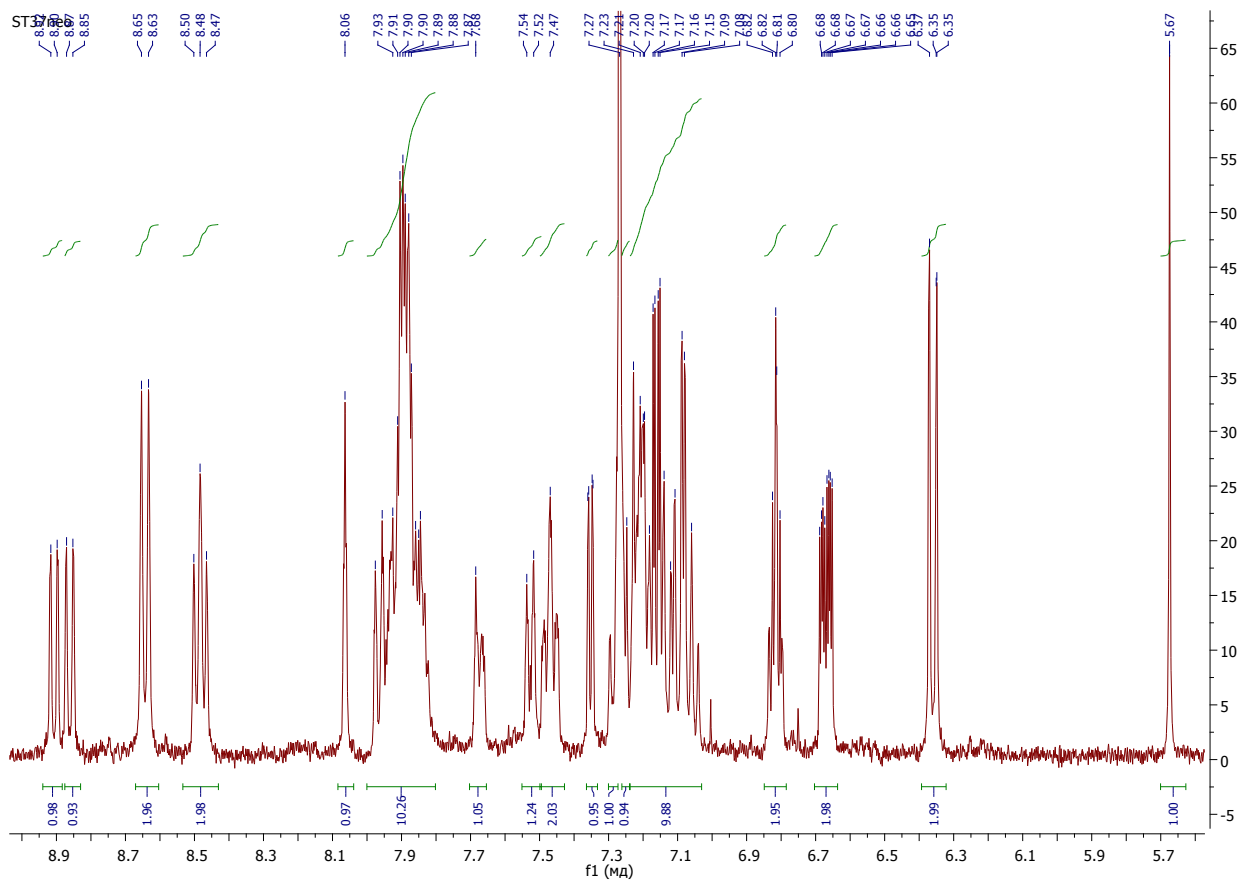

Figure S17. Aromatic region of  $^1\text{H}$  NMR spectrum of **2** (400 MHz, 298K,  $\text{CDCl}_3$ ).

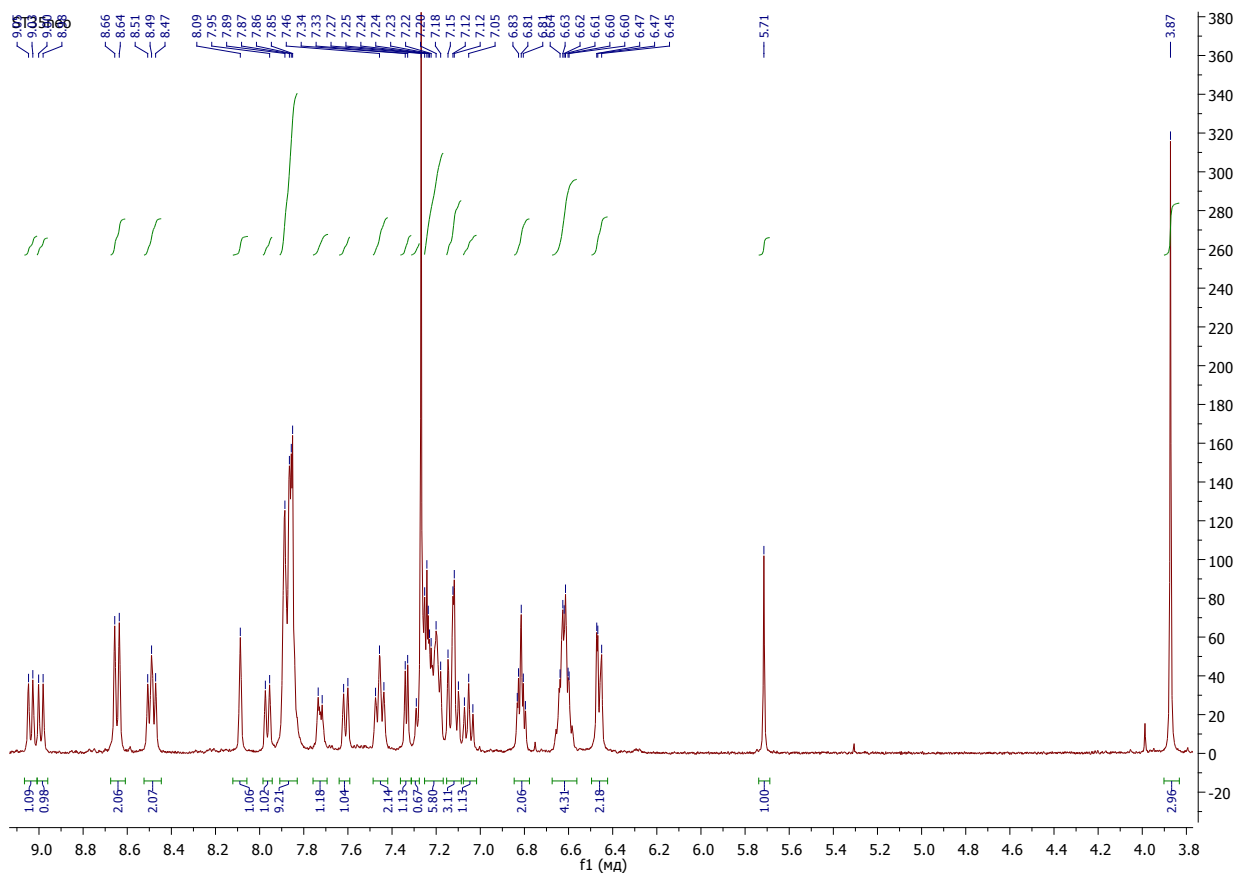

Figure S18.  $^1\text{H}$  NMR spectrum of **3** (400 MHz, 298K,  $\text{CDCl}_3$ ).

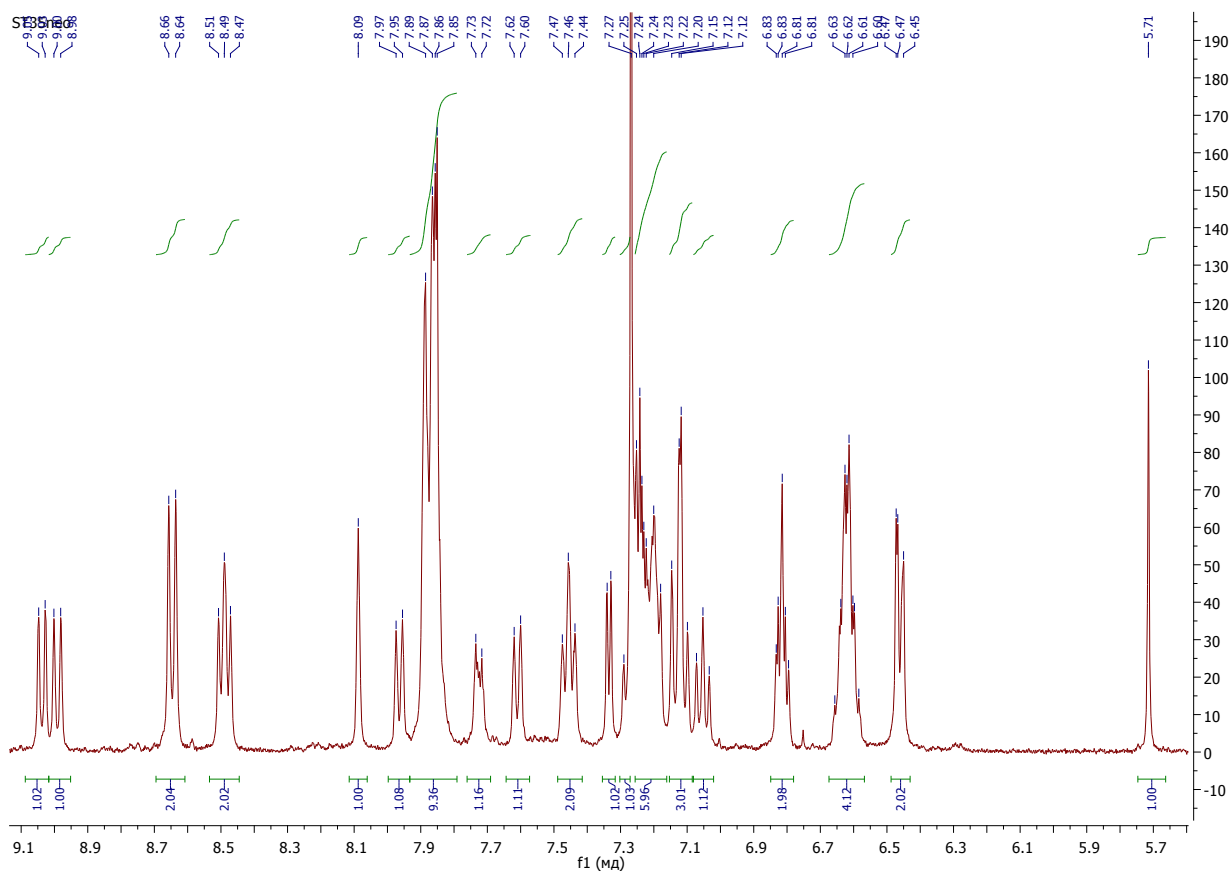

Figure S19. Aromatic region of  $^1\text{H}$  NMR spectrum of **3** (400 MHz, 298K,  $\text{CDCl}_3$ ).

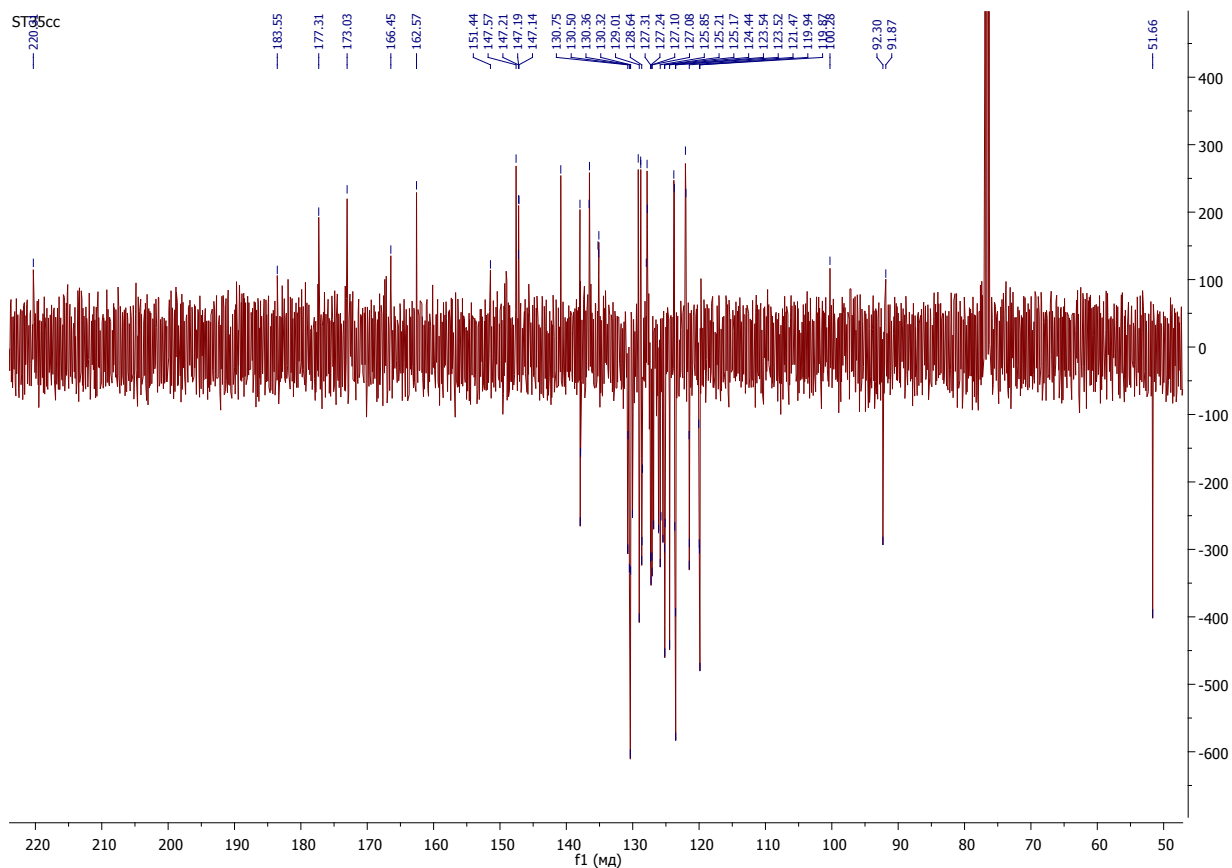

Figure S19b.  $^{13}\text{C}\{^1\text{H}\}$  APT NMR spectrum of **3** (101 MHz, 298K,  $\text{CDCl}_3$ ).

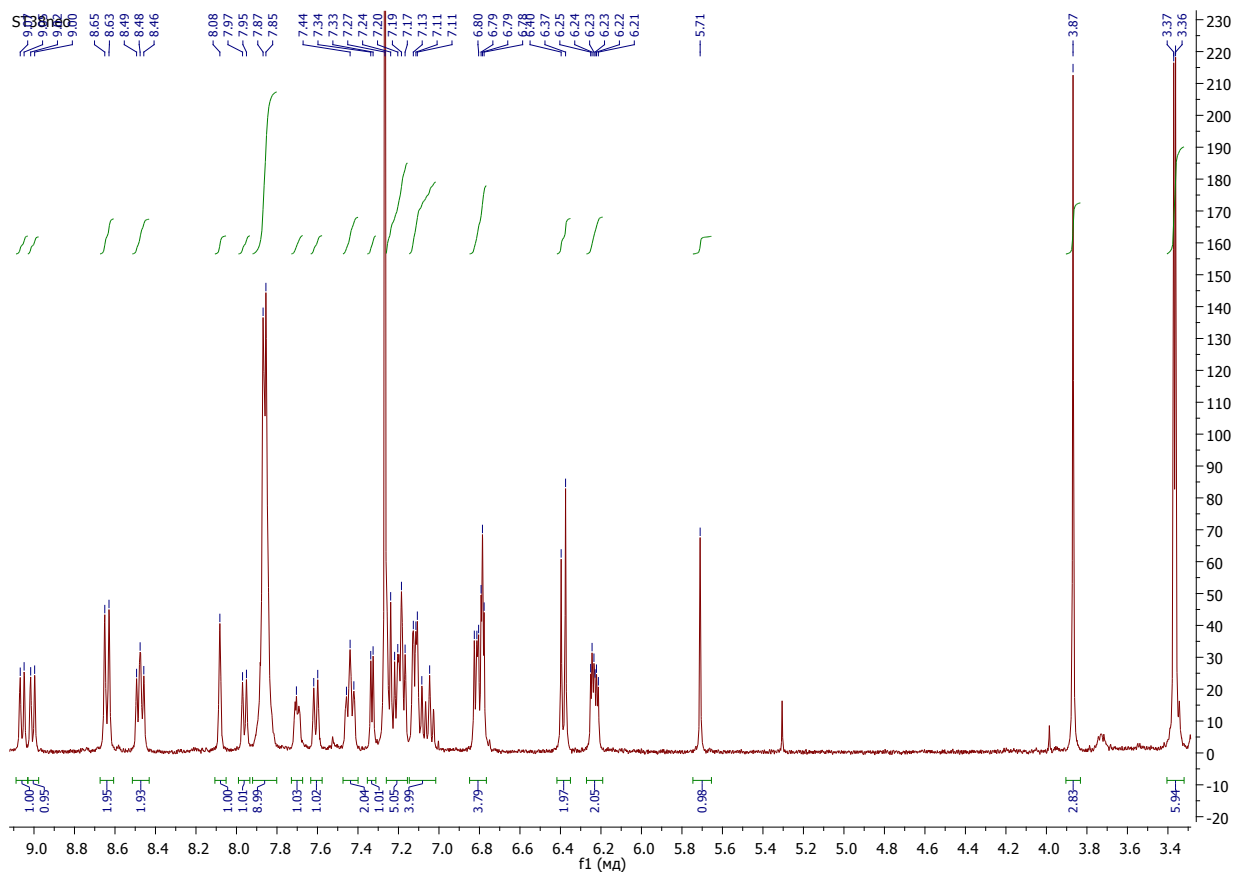

Figure S20.  $^1\text{H}$  NMR spectrum of **4** (400 MHz, 298K,  $\text{CDCl}_3$ ).

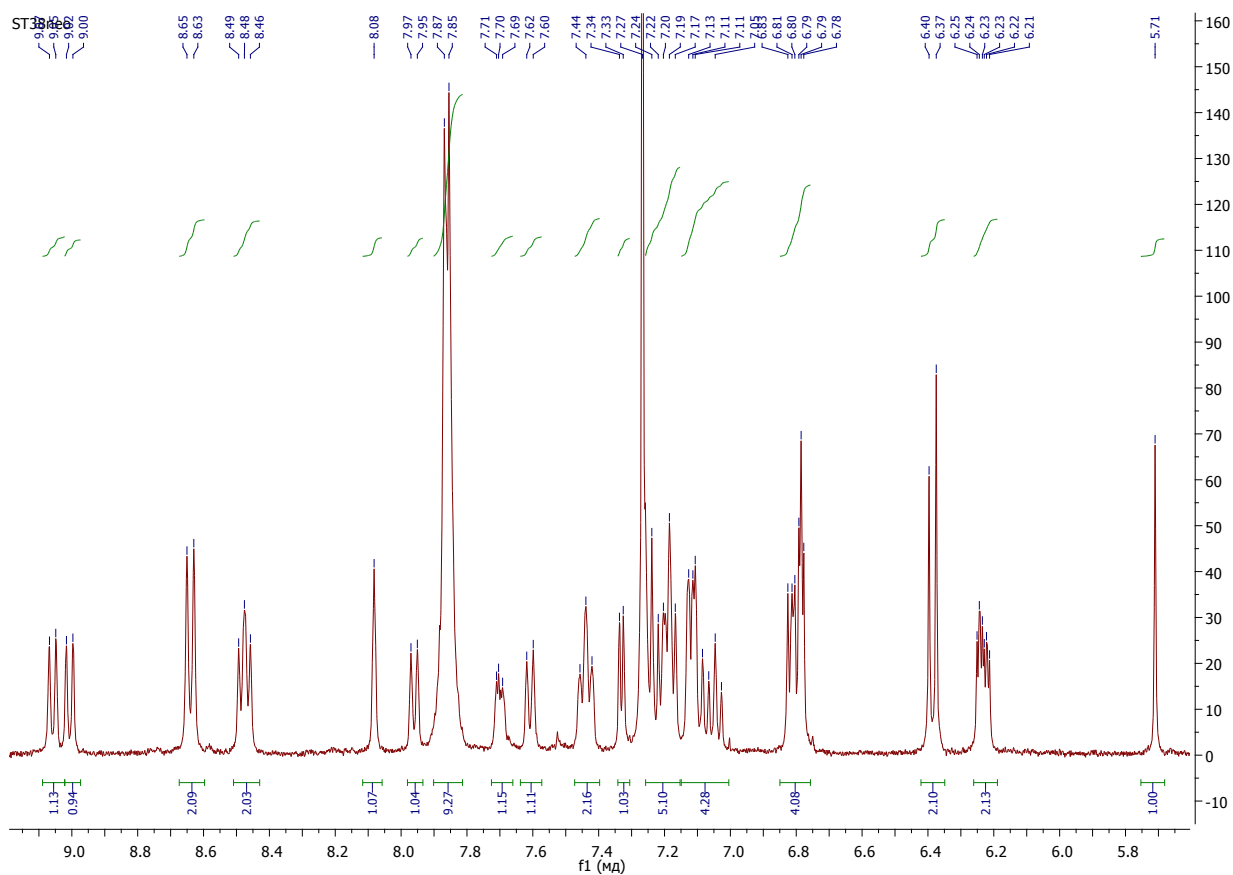

Figure S21. Aromatic region of  $^1\text{H}$  NMR spectrum of **4** (400 MHz, 298K,  $\text{CDCl}_3$ ).

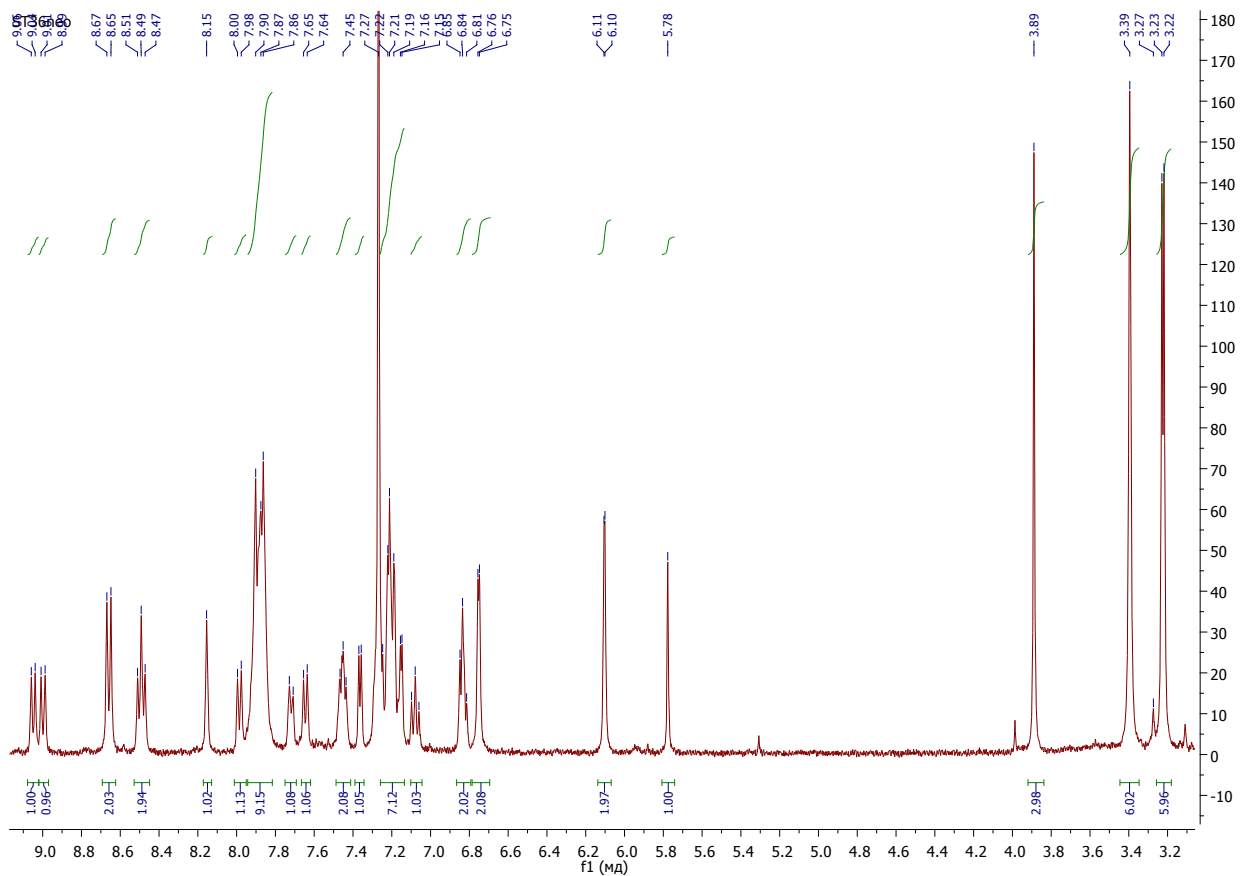

Figure S22.  $^1\text{H}$  NMR spectrum of **5** (400 MHz, 298K,  $\text{CDCl}_3$ ).

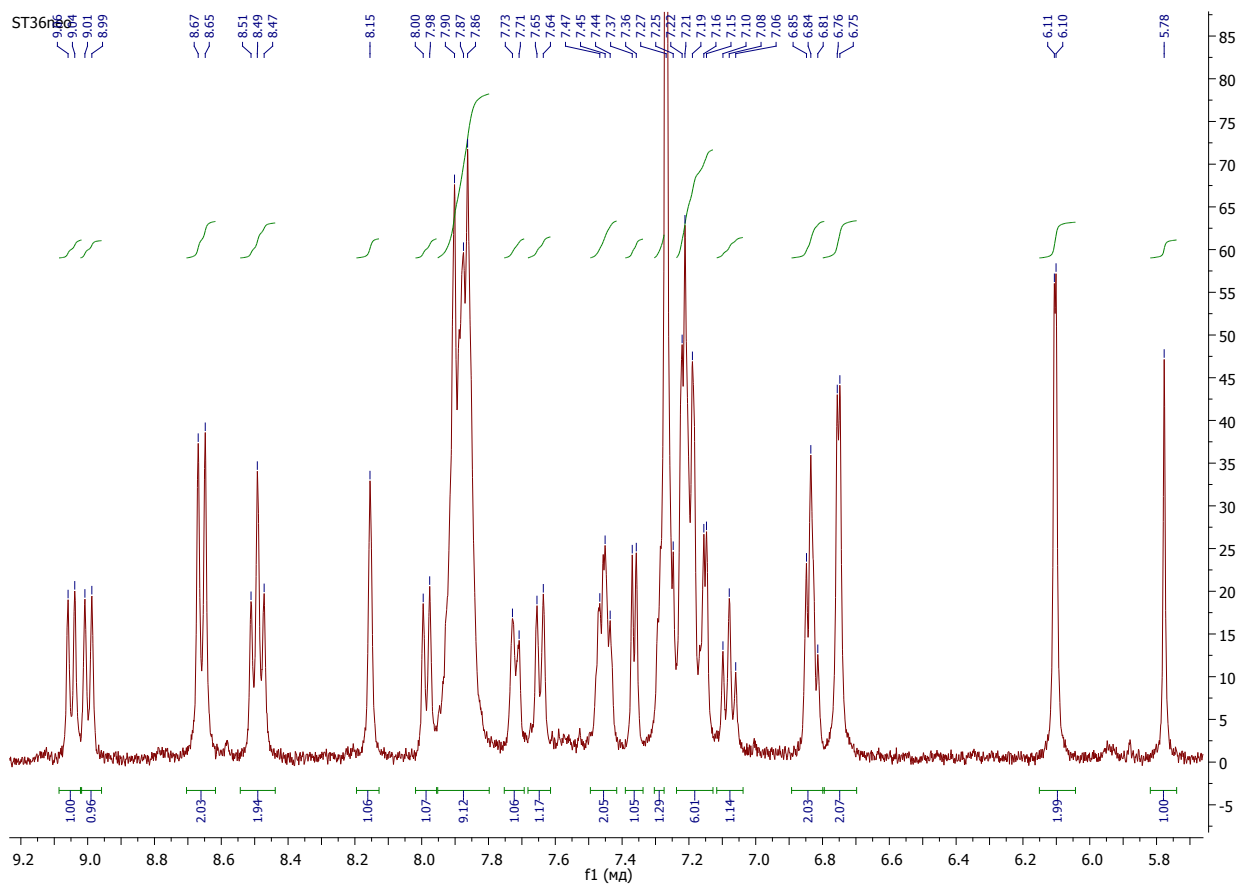

Figure S23. Aromatic region of  $^1\text{H}$  NMR spectrum of **5** (400 MHz, 298K,  $\text{CDCl}_3$ ).

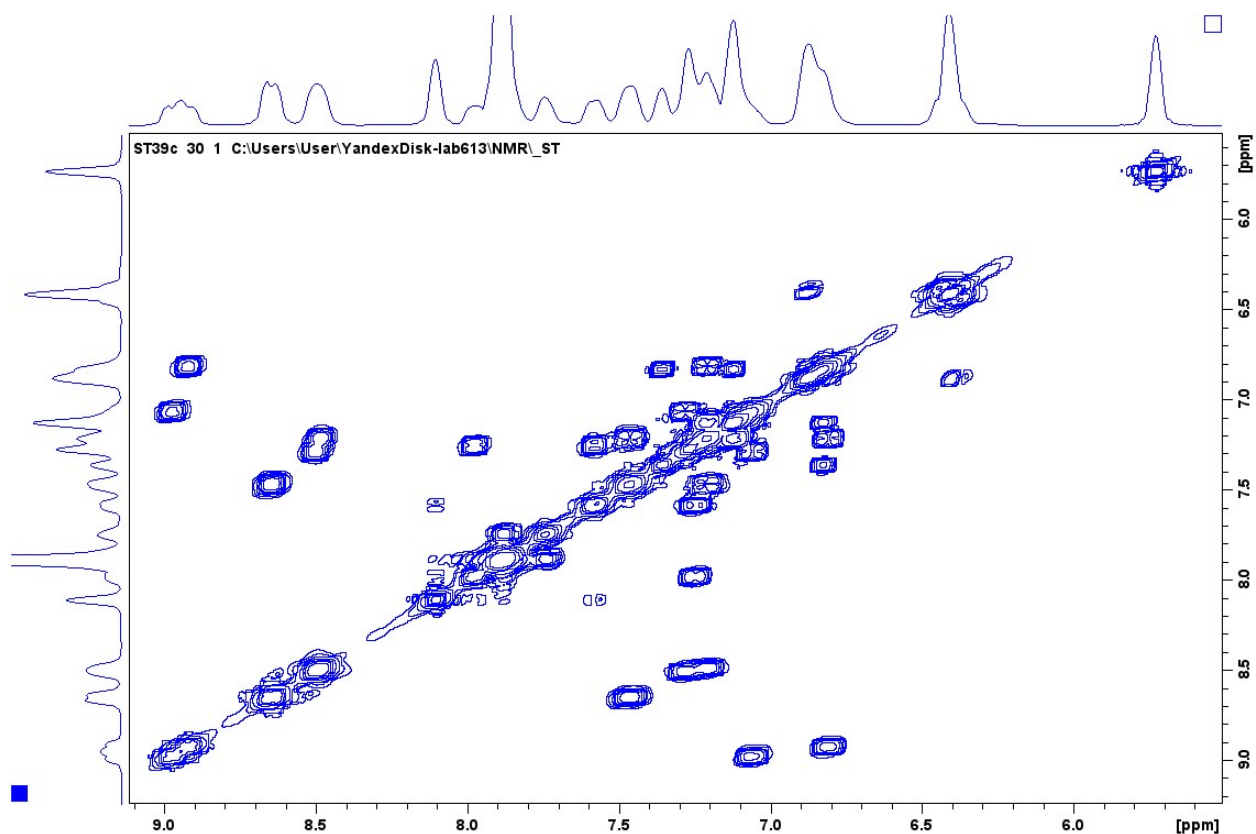

Figure S24. Aromatic region of COSY  $^1\text{H}$ ,  $^1\text{H}$  NMR spectrum of **1**

Assignment:

8.97 (d,  $J=7.9$  Hz, 1 H)

8.91 (d,  $J=7.9$  Hz, 1 H)

8.65 (d,  $J=8.4$  Hz, 2 H)

8.52 – 8.45 (m, 2 H)

8.12 – 8.08 (m, 1 H)

7.97 (d,  $J=7.7$  Hz, 1 H)

7.93 – 7.81 (m, 9 H); 7.76 – 7.71 (m, 1 H)

residual signals

7.57 (d,  $J=7.9$  Hz, 1 H)

7.50 – 7.43 (m, 2H)

7.36 (d,  $J=4.9$  Hz, 1 H)

7.30 – 7.27 (m, 1H)

7.25 – 7.17 (m, 4 H)

7.15 – 7.03 (m, 4 H)

6.89 – 6.78 (m, 4H)

**x**

6.46 – 6.34 (m, 4H)

5.72 (s, 1 H)

3.88 (s, 3 H)

**COOCH<sub>3</sub>**

**q'/q**

**q/q'**

**m, m'**

**n, n'**

**r**

**u/s**

**s/u**

**l, l'**

**y/w**

**o'/o**

**k, k'; o/o'; t**

**p'/p; w/y; j, j'**

**(c, c')/(d, d'); p/p';**

**a, a'; (d, d')/(c, c')**

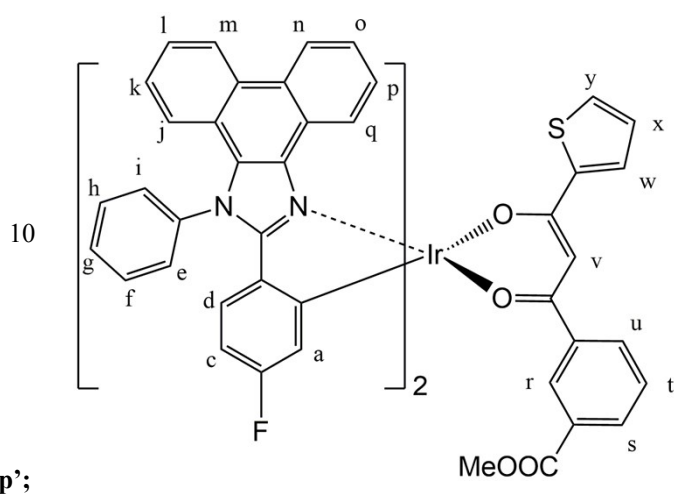

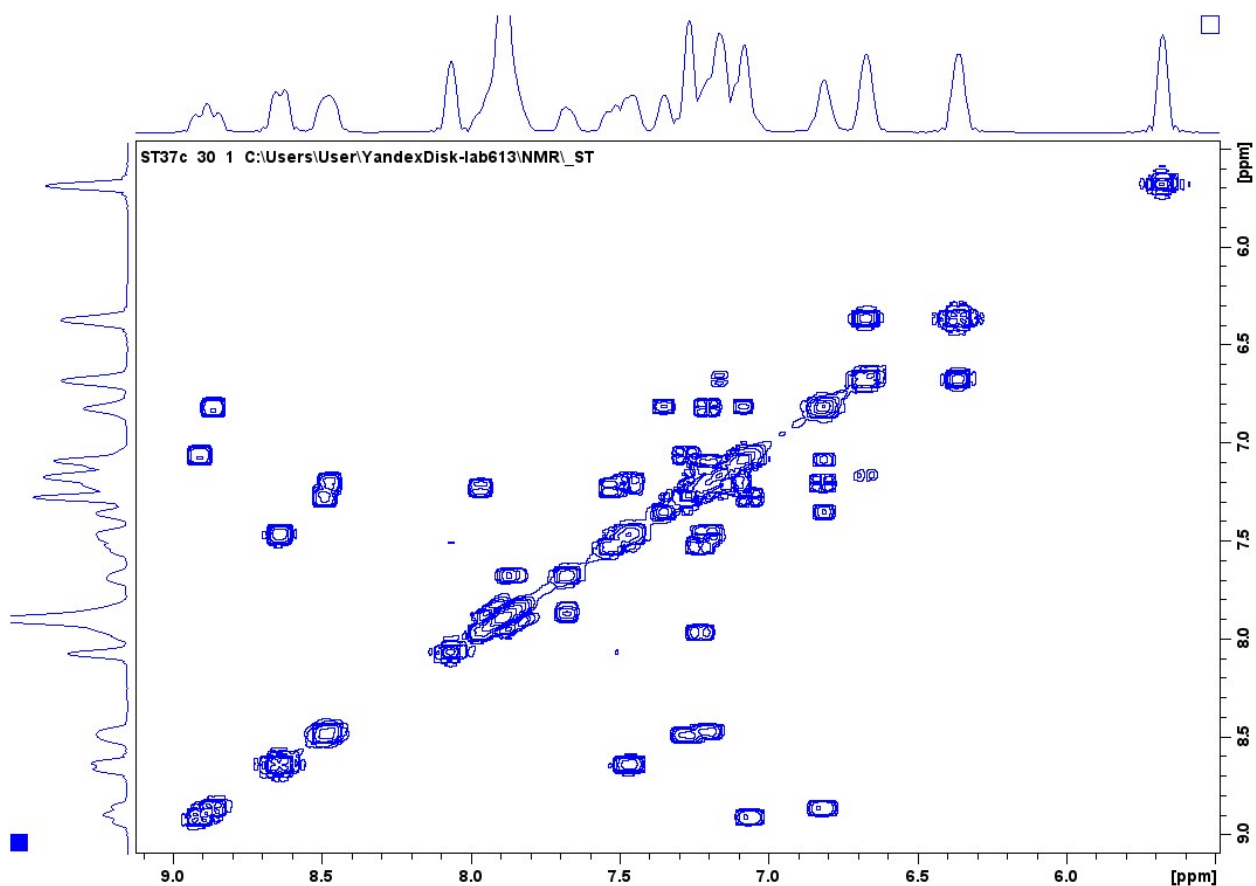

Figure S25. Aromatic region of COSY  $^1\text{H}$ ,  $^1\text{H}$  NMR spectrum of **2**

Assignment:

8.91 (d,  $J=7.4$  Hz, 1 H)  
 8.86 (d,  $J=7.4$  Hz, 1 H)  
 8.64 (d,  $J=8.2$  Hz, 2 H)  
 8.52 – 8.44 (m, 2 H)  
 8.08 – 8.05 (m, 1 H)  
 7.96 (d,  $J=7.7$  Hz, 1 H)  
 8.00 – 7.80 (m, 10 H); 7.70 – 7.65 (m, 1 H)  
 11 residual signals  
 7.55 – 7.50 (m, 1 H)  
 7.50 – 7.44 (m, 2 H)  
 7.35 (dd,  $J=5.0, 1.0$  Hz, 1 H)  
 7.30 – 7.27 (m, 1H)  
 7.26 – 7.04 (m, 10H)  
**j, j'**; **a, a'**; **y/w**; **p'/p**  
 6.86 – 6.77 (m, 2H)  
 6.67 (ddd,  $J = 8.5, 3.8, 2.2$  Hz, 2H)  
 6.39 – 6.32 (m, 2H)  
 5.67 (s, 1 H)  
 3.89 (s, 3 H) **COOCH<sub>3</sub>**

**q'/q**

**q/q'**

**m, m'**

**n, n'**

**r**

**u/s**

**s/u**

**l, l'**

**w/y**

**o/o'**

**t; o'/o; k, k';**

**x, p/p'**

**c, c'**

**d, d'**

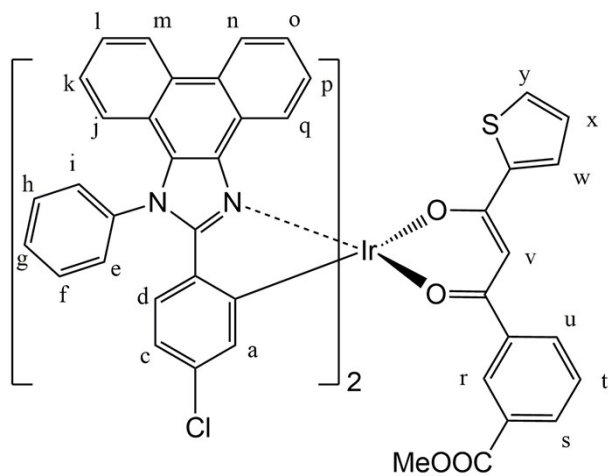

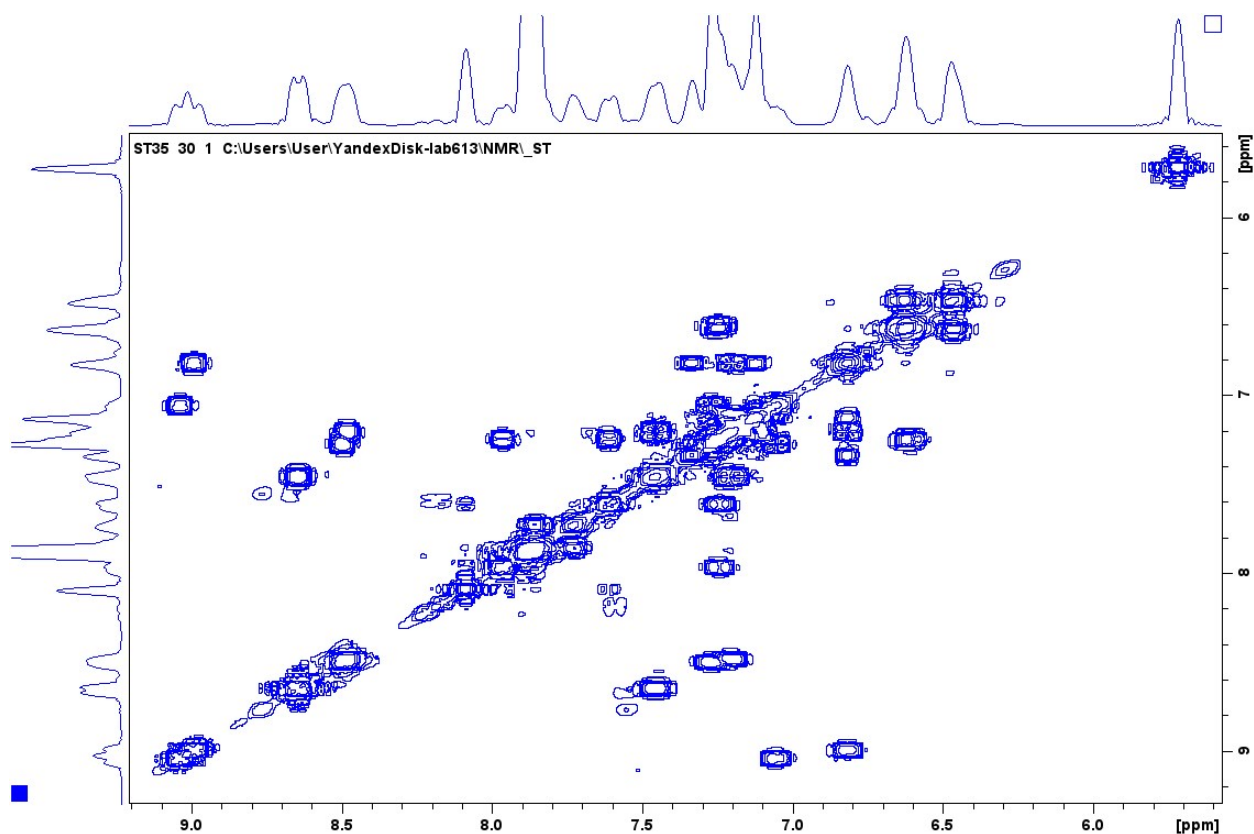

Figure S26. Aromatic region of COSY  $^1\text{H}$ ,  $^1\text{H}$  NMR spectrum of **3**

Assignment:

9.04 (d,  $J=7.8$  Hz, 1 H)

8.99 (d,  $J=8.1$  Hz, 1 H)

8.65 (d,  $J=8.3$  Hz, 2 H)

8.54 – 8.42 (m, 2 H)

8.10 – 8.07 (m, 1 H)

7.96 (d,  $J=7.7$  Hz, 1 H)

7.92 – 7.81 (m, 9 H); 7.75 – 7.70 (m, 1 H)

10 residual signals

7.61 (d,  $J=7.7$  Hz, 1 H)

7.49 – 7.42 (m, 2 H)

7.33 (d,  $J=4.4$  Hz, 1 H)

7.30 – 7.17 (m, 7H)

**k, k'; t**

7.16 – 7.09 (m, 3H)

7.05 (t,  $J=7.7$  Hz, 1 H)

6.87 – 6.76 (m, 2H)

6.68 – 6.53 (m, 4H)

6.50 – 6.41 (m, 2H)

5.71 (s, 1 H)

3.87 (s, 3 H) **COOCH<sub>3</sub>**

**q'/q**

**q/q'**

**m, m'**

**n, n'**

**r**

**u/s**

**s/u**

**l, l'**

**w/y**

**c, c'; o, o';**

**j, j'; y/w**

**p'/p**

**x, p/p'**

**b, b'; d, d'**

**a, a'**

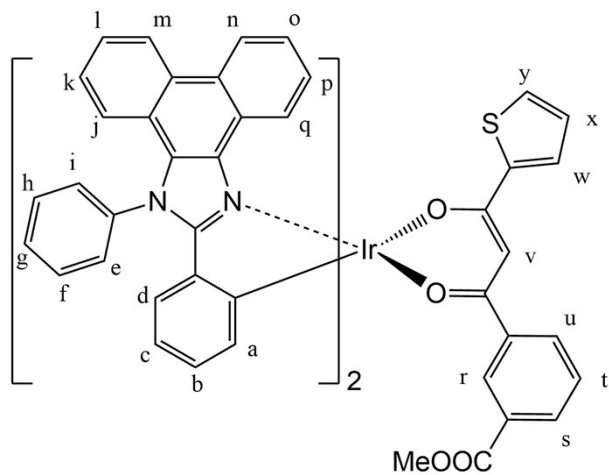



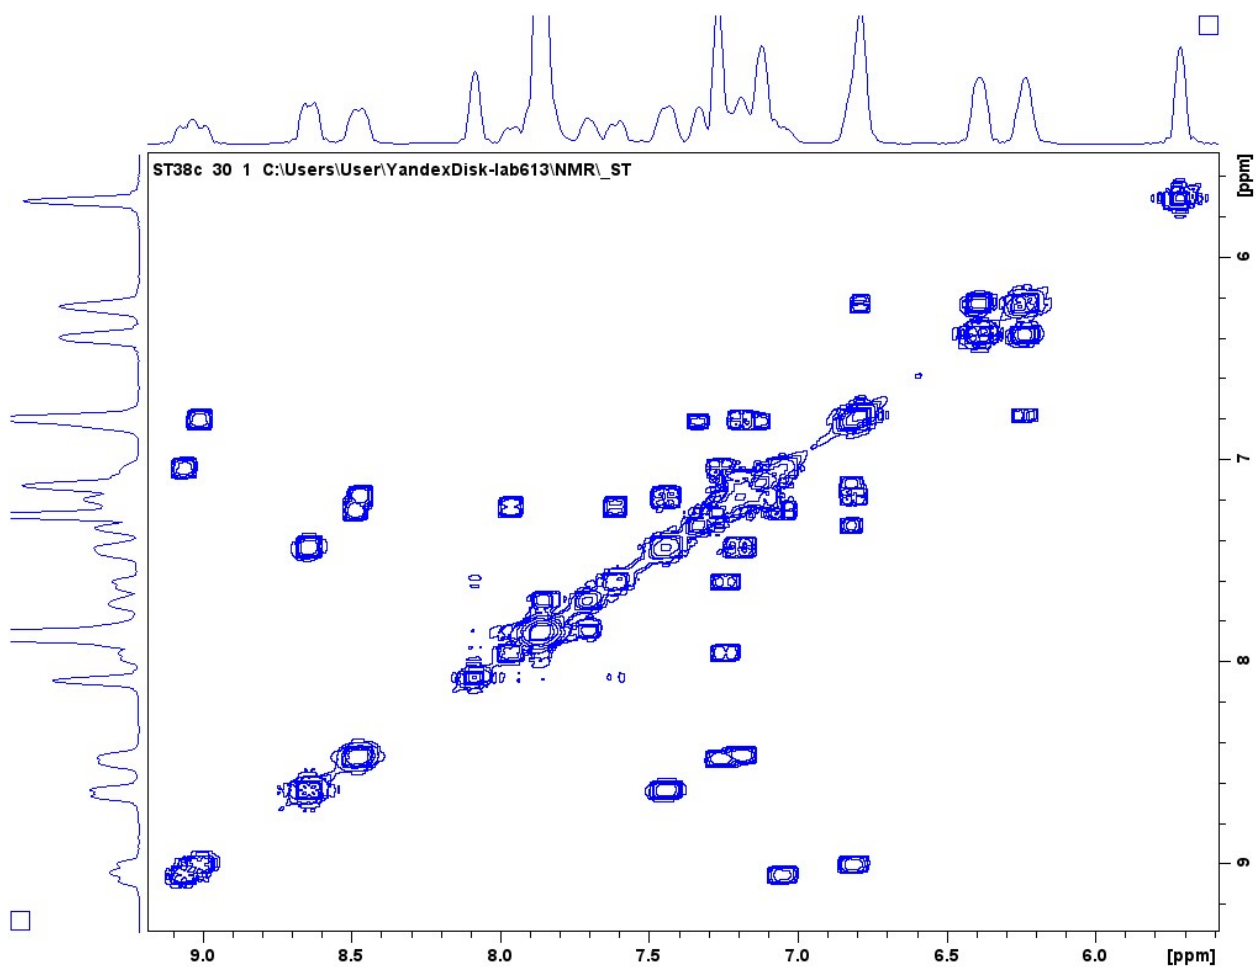

Figure S27. Aromatic region of COSY  $^1\text{H}$ ,  $^1\text{H}$  NMR spectrum of **4**

Assignment:

9.06 (d,  $J=7.6$  Hz, 1 H)  
 9.01 (d,  $J=8.1$  Hz, 1 H)  
 8.64 (d,  $J=8.3$  Hz, 2 H)  
 8.51 – 8.43 (m, 2 H)  
 8.10 – 8.07 (m, 1 H)  
 7.96 (d,  $J=7.7$  Hz, 1 H)  
 7.90 – 7.81 (m, 9 H); 7.73 – 7.67 (m, 1 H)  
 10 residual signals  
 7.61 (d,  $J=7.7$  Hz, 1 H)  
 7.47 – 7.40 (m, 2 H)  
 7.33 (d,  $J=4.6$  Hz, 1 H)  
 7.25 – 7.14 (m, 5H); 7.13 – 7.00 (m, 4H);  
**j, j'; o, o'; k, k'; t; y/w; p'/p**  
 6.84 – 6.76 (m, 4H)  
 6.39 (d,  $J=8.7$  Hz, 2H)  
 6.26 – 6.20 (m, 2H)  
 5.71 (s, 1 H) **v**  
 3.87 (s, 3 H) **COOCH<sub>3</sub>**  
 3.39-3.33 (m, 6H). **OCH<sub>3</sub>, (OCH<sub>3</sub>)'**

**q'/q**  
**q/q'**  
**m, m'**  
**n, n'**  
**r**  
**u/s**

**s/u**  
**l, l'**  
**w/y**

**x; p/p'; a, a'**  
**d, d'**  
**b, b'**

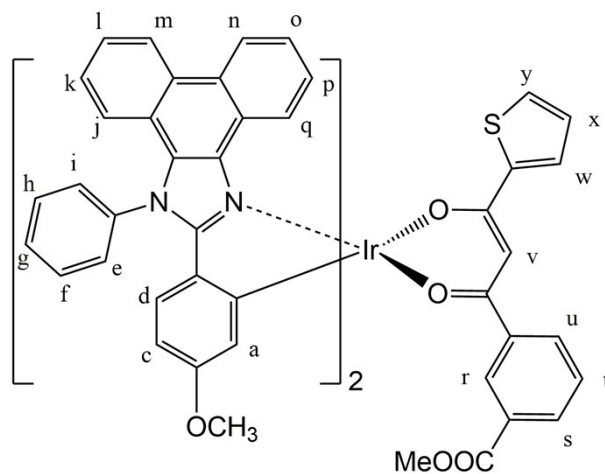

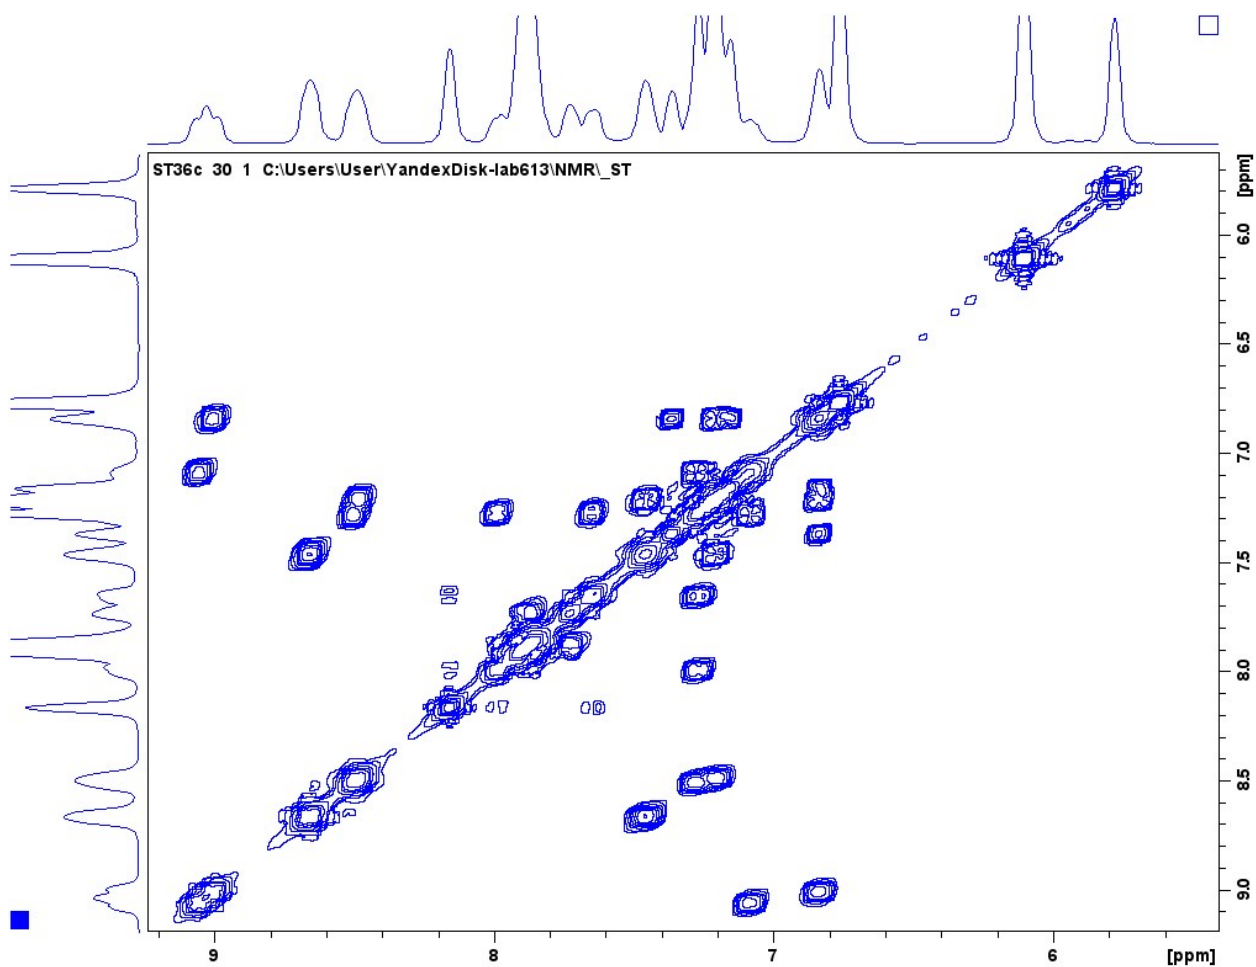

Figure S28. Aromatic region of COSY  $^1\text{H}$ ,  $^1\text{H}$  NMR spectrum of **5**

Assignment:

|                                                                                                                              |                        |
|------------------------------------------------------------------------------------------------------------------------------|------------------------|
| 9.05 (d, $J=8.0$ Hz, 1 H)                                                                                                    | <b>q'/q</b>            |
| 9.00 (d, $J=8.3$ Hz, 1 H)                                                                                                    | <b>q/q'</b>            |
| 8.66 (d, $J=8.4$ Hz, 2 H)                                                                                                    | <b>m, m'</b>           |
| 8.49 (t, $J=7.9$ Hz, 2 H)                                                                                                    | <b>n, n'</b>           |
| 8.17 – 8.14 (m, 1 H)                                                                                                         | <b>r</b>               |
| 7.99 (d, $J=7.8$ Hz, 1 H)                                                                                                    | <b>u/s</b>             |
| 7.94 – 7.81 (m, 9 H); 7.75 – 7.69 (m, 1 H)                                                                                   |                        |
| 10 residual signals                                                                                                          |                        |
| 7.65 (d, $J=7.6$ Hz, 1 H)                                                                                                    | <b>s/u</b>             |
| 7.48 – 7.42 (m, 2 H)                                                                                                         | <b>l, l'</b>           |
| 7.36 (d, $J=4.8$ Hz, 1 H)                                                                                                    | <b>w/y</b>             |
| 7.29 – 7.27 (m, 1H); 7.26 – 7.14 (m, 7H);                                                                                    |                        |
| <b>j, j'; o, o'; k, k'; t; y/w</b>                                                                                           |                        |
| 7.08 (t, $J=7.6$ Hz, 1 H)                                                                                                    | <b>p'/p</b>            |
| 6.86 – 6.80 (m, 2H)                                                                                                          | <b>x; p/p'</b>         |
| 6.77 – 6.73 (m, 2H)                                                                                                          | <b>(d, d')/(a, a')</b> |
| 6.12 – 6.09 (m, 2H)                                                                                                          | <b>(a, a')/(d, d')</b> |
| 5.71 (s, 1 H)                                                                                                                | <b>v</b>               |
| 3.89 (s, 3 H) <b>COOCH<sub>3</sub></b>                                                                                       |                        |
| 3.39 (s, 6H). <b>(OCH<sub>3</sub>, OCH<sub>3</sub>')<sub>b</sub>/((OCH<sub>3</sub>, OCH<sub>3</sub>')<sub>c</sub></b>        |                        |
| 3.26 – 3.19 (m, 6H). <b>(OCH<sub>3</sub>, OCH<sub>3</sub>')<sub>d</sub>/((OCH<sub>3</sub>, OCH<sub>3</sub>')<sub>b</sub></b> |                        |

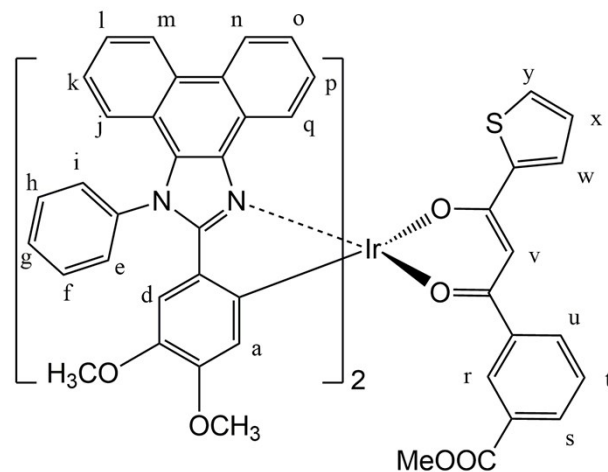

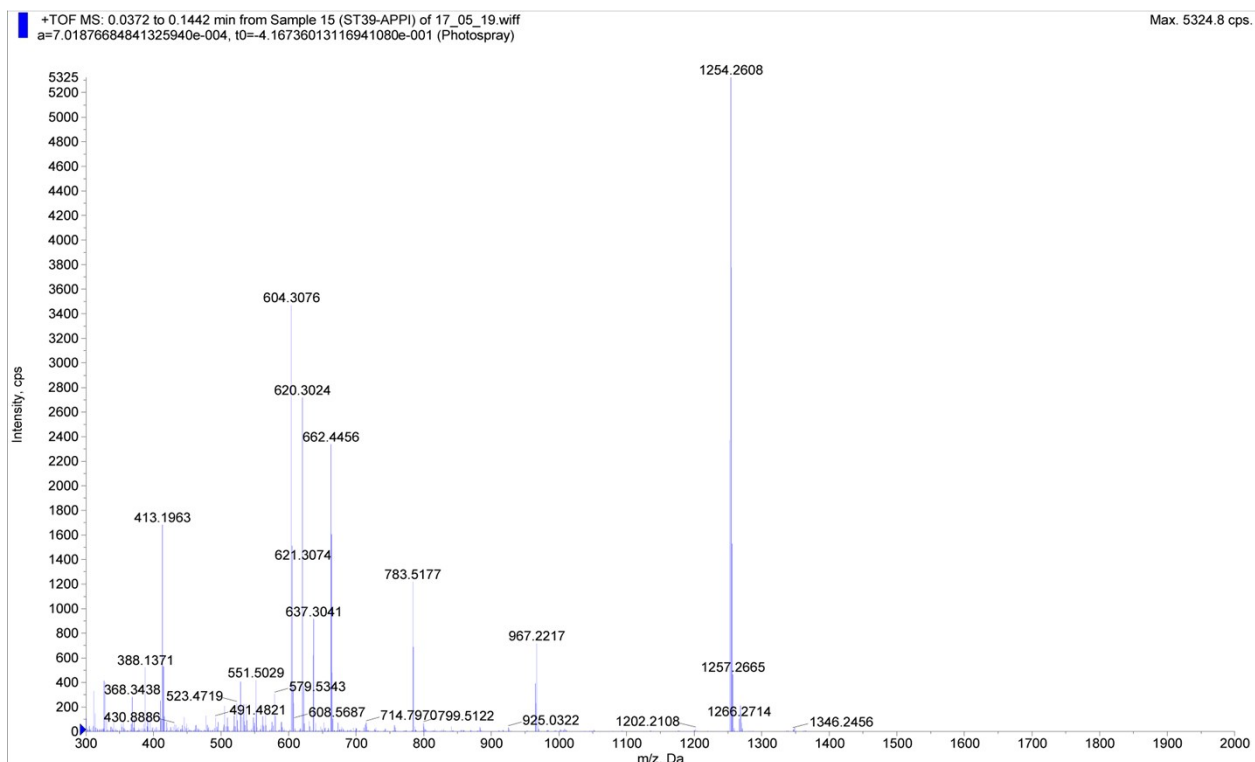

Figure S29. High resolution mass spectrum of **1**.

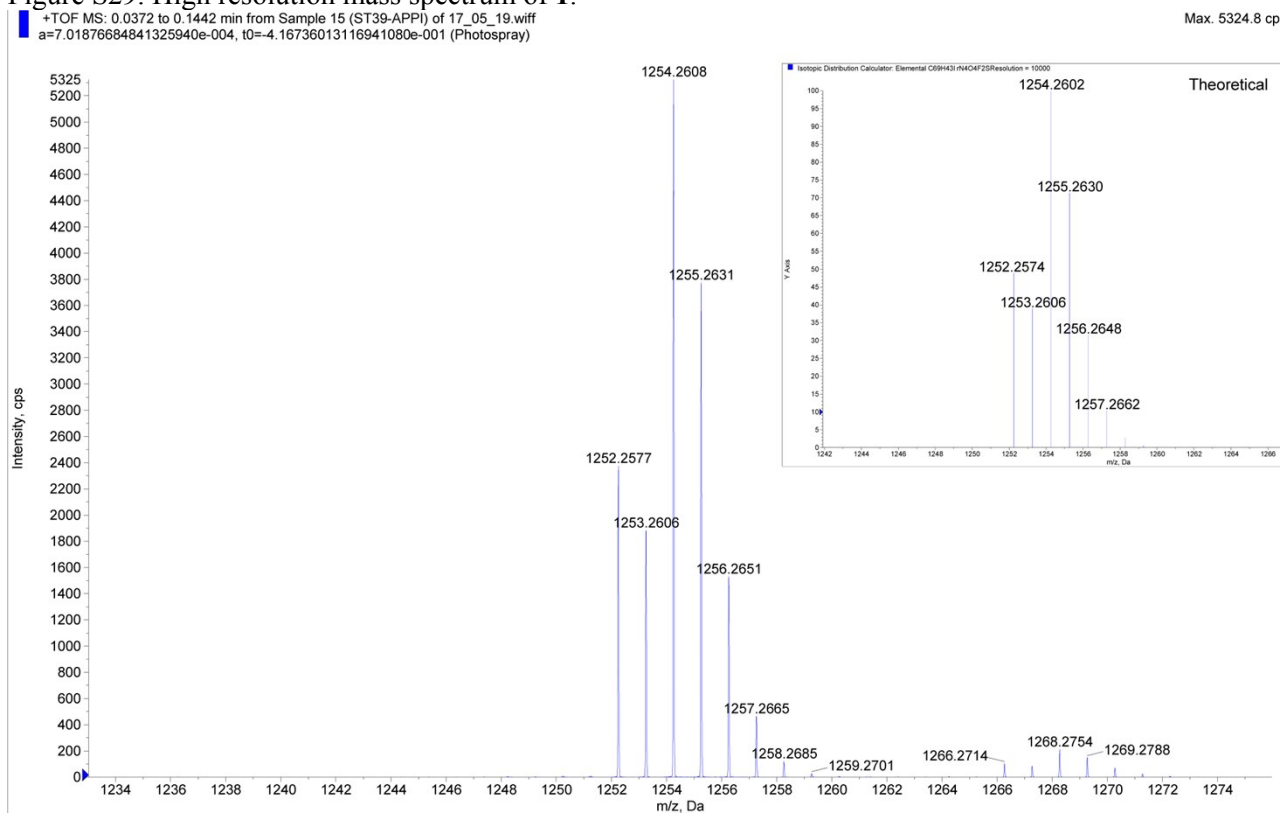

Figure S30. High resolution mass spectrum of **1**.

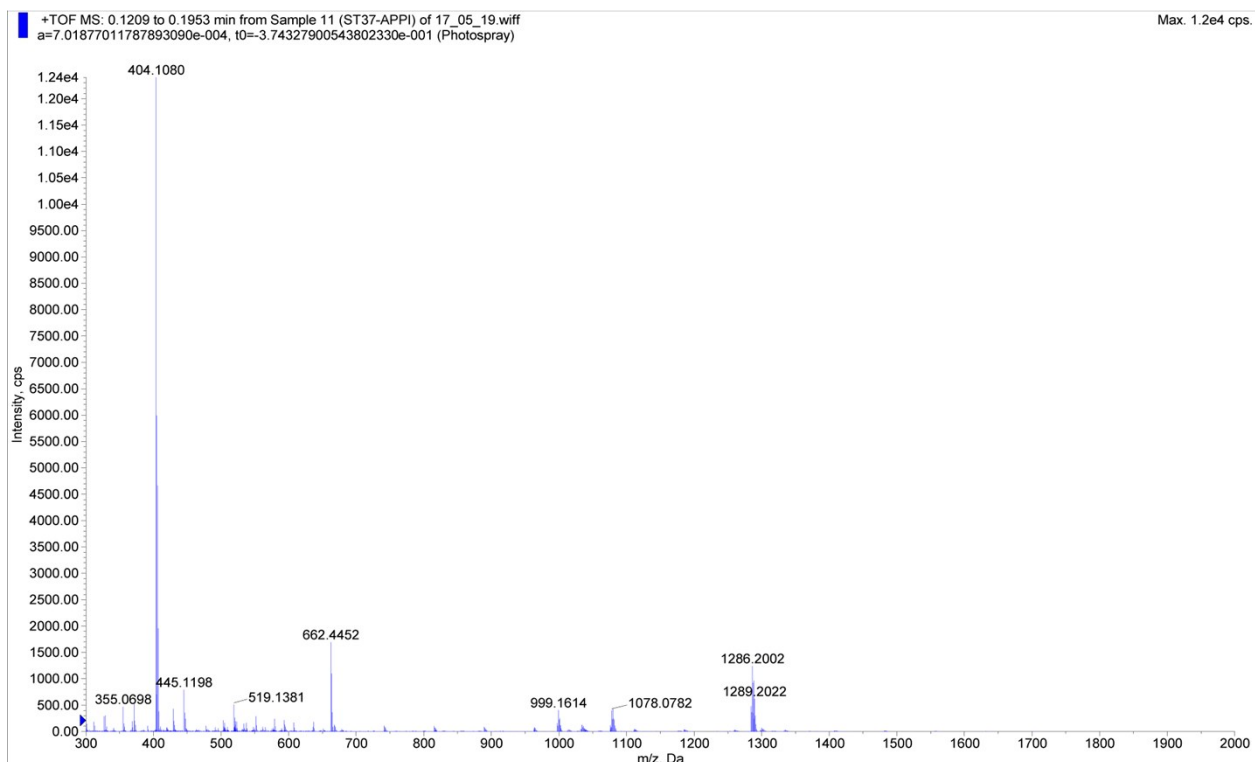

Figure S31. High resolution mass spectrum of **2**.

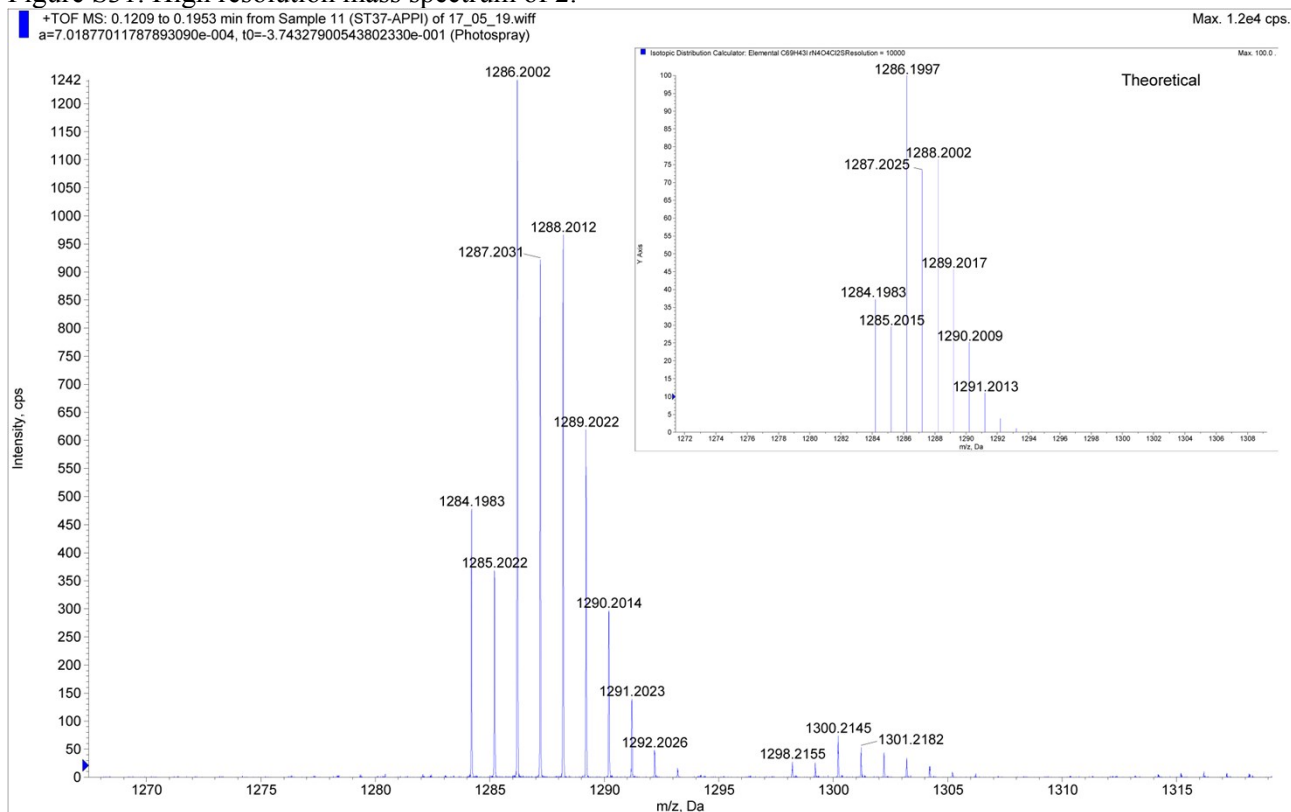

Figure S32. High resolution mass spectrum of **2**.

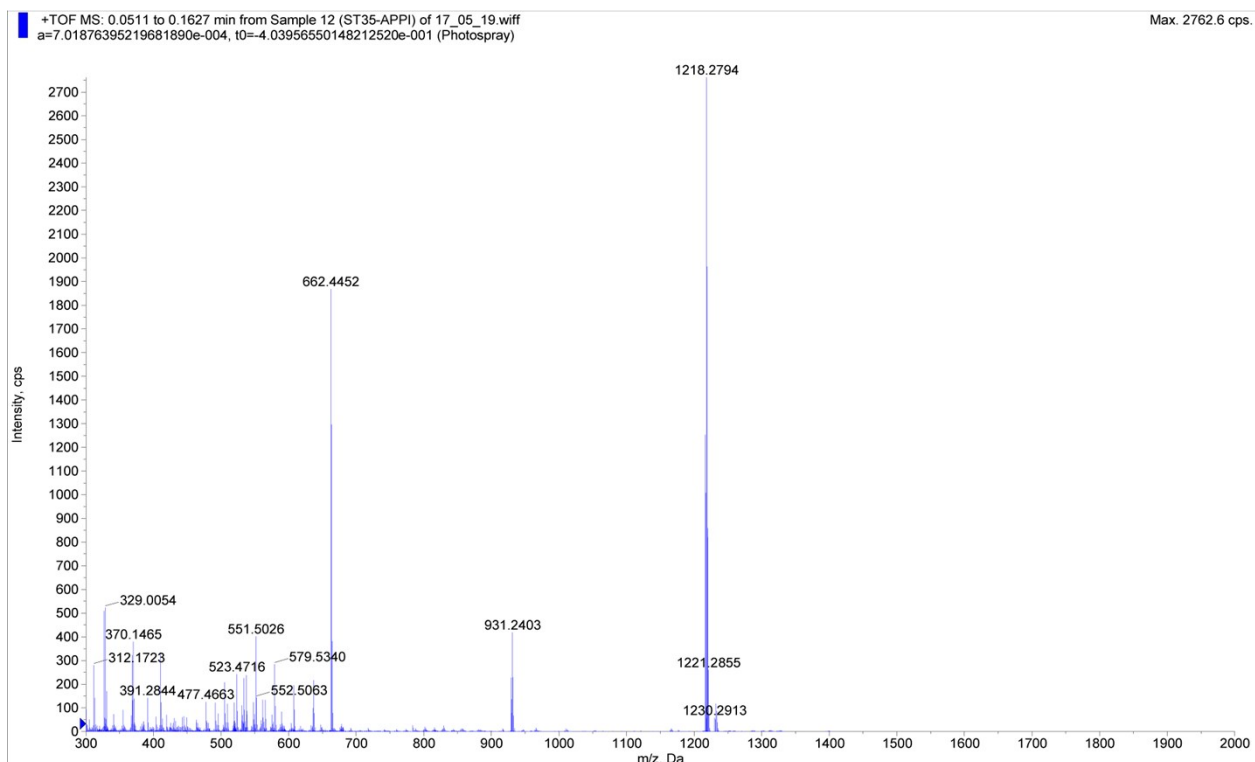

Figure S33. High resolution mass spectrum of **3**.

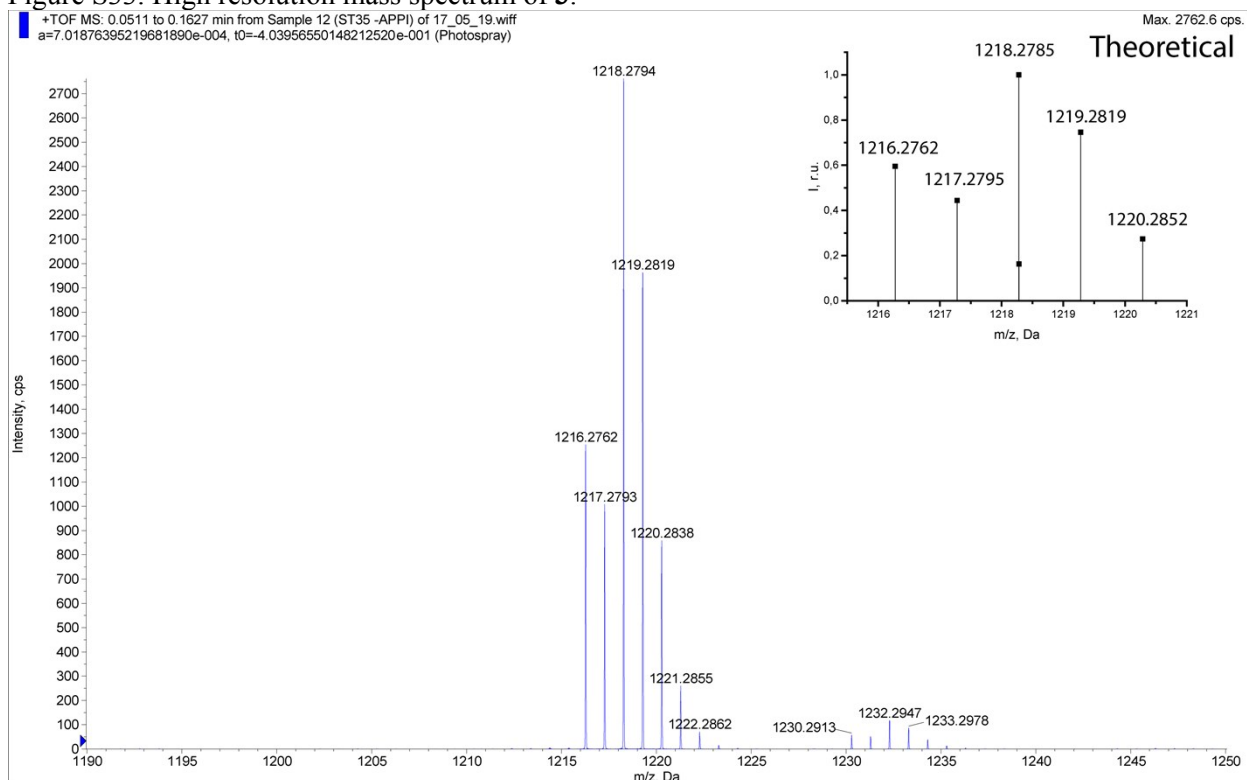

Figure S34. High resolution mass spectrum of **3**.

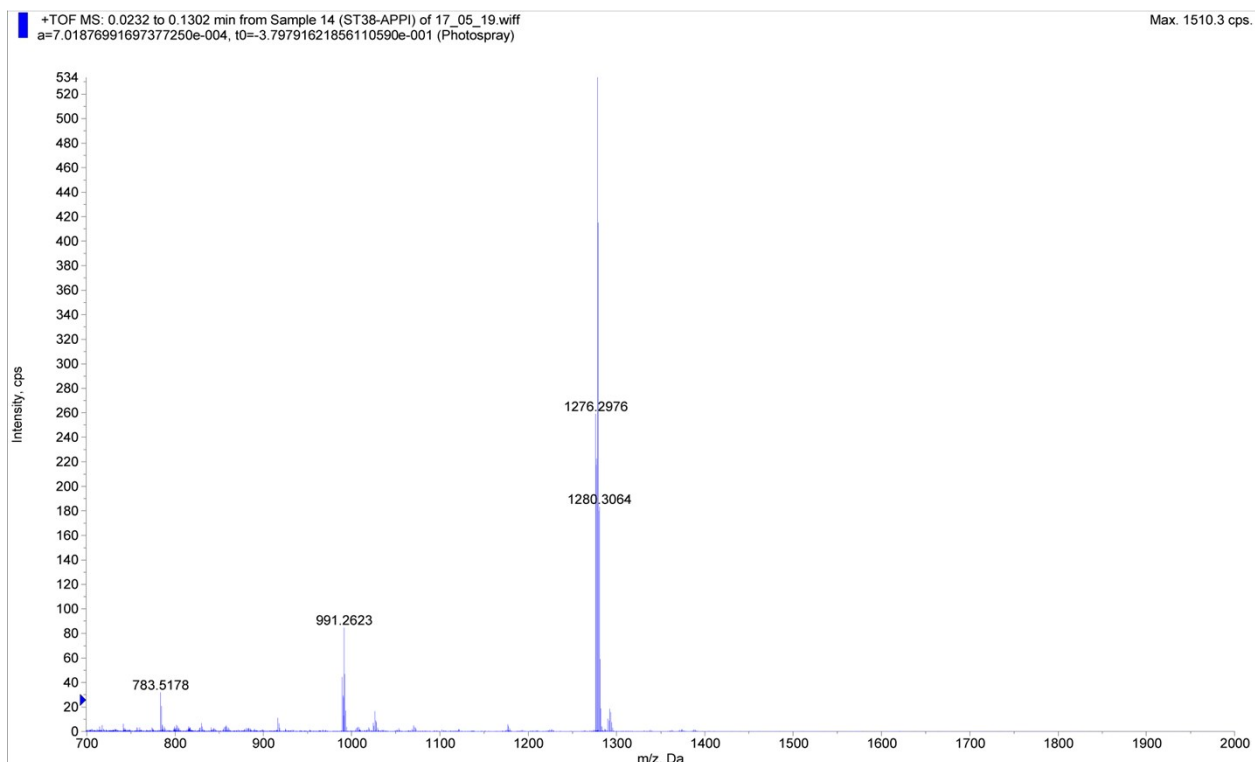

Figure S35. High resolution mass spectrum of 4.

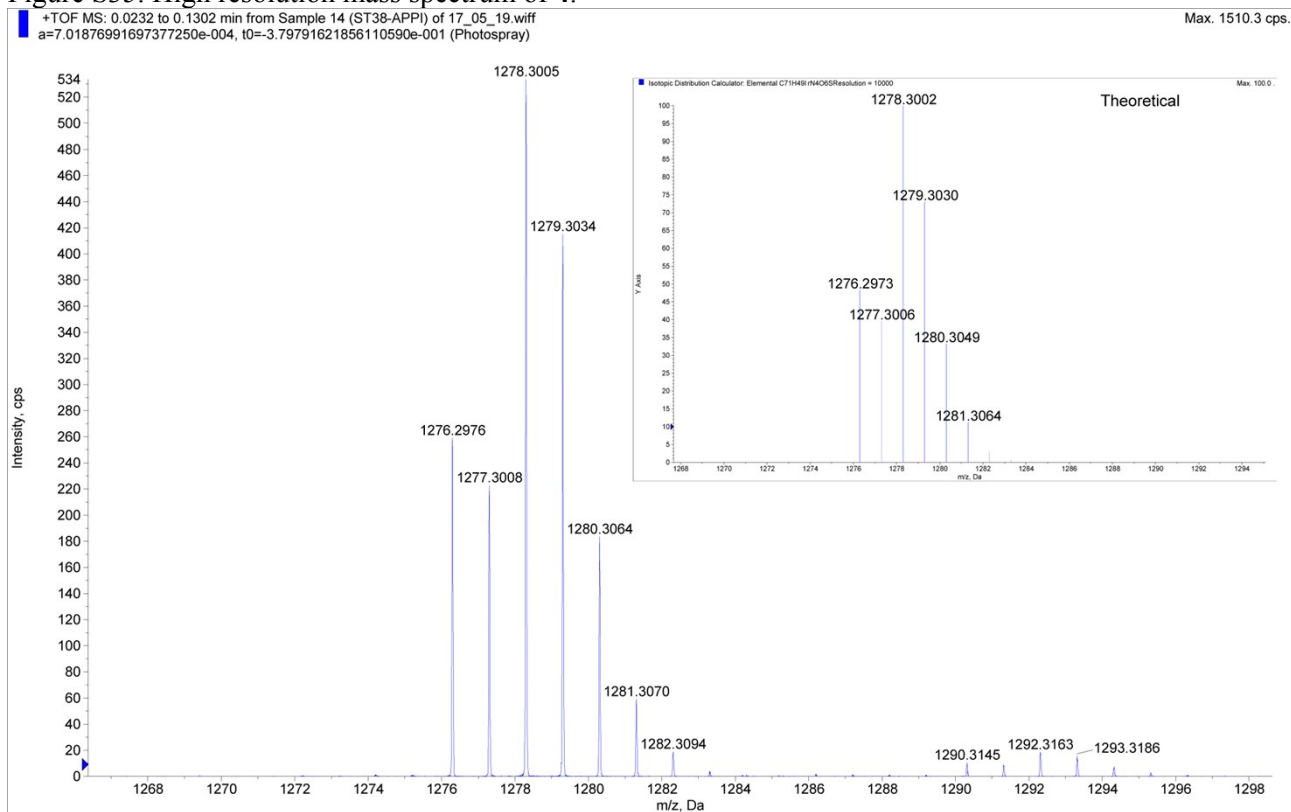

Figure S36. High resolution mass spectrum of 4.

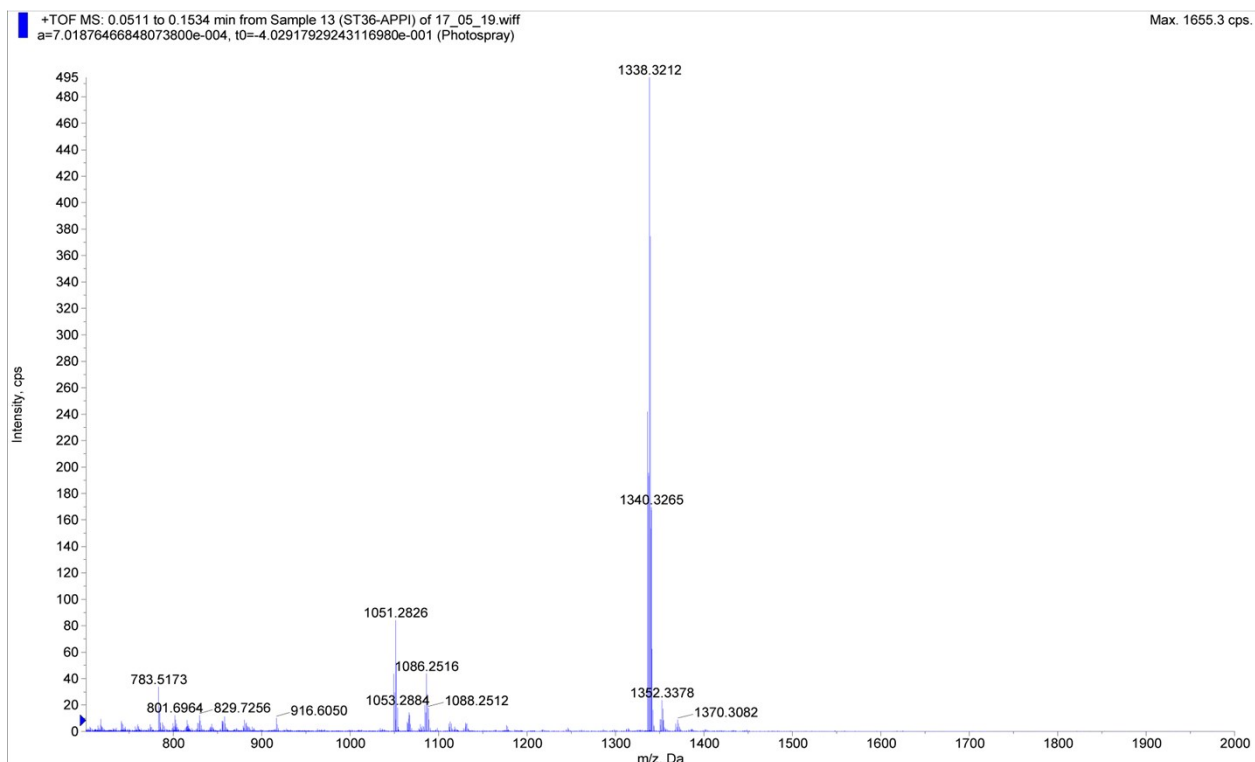

Figure S37. High resolution mass spectrum of **5**.

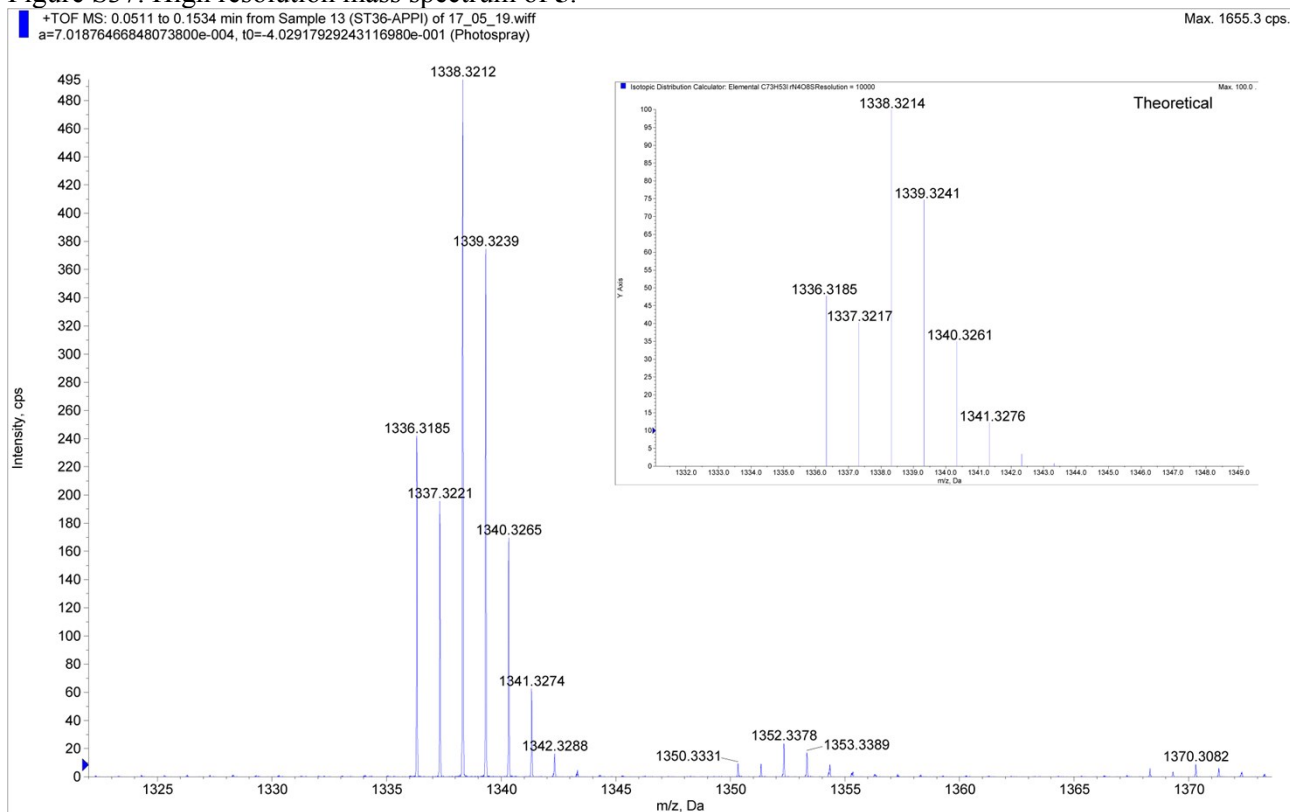

Figure S38. High resolution mass spectrum of **5**.

Table S1. Complex species (with their relative masses) in mass spectra of **1** – **5**.

|          | $\text{Ir}(\text{C}^{\wedge}\text{N})_2^+$ | $\text{Ir}(\text{C}^{\wedge}\text{N})_2(\text{O}^{\wedge}\text{O})^+$ |
|----------|--------------------------------------------|-----------------------------------------------------------------------|
| <b>1</b> | 967.2217                                   | 1254.2608                                                             |
| <b>2</b> | 999.1614                                   | 1286.2002                                                             |
| <b>3</b> | 931.2403                                   | 1218.2794                                                             |
| <b>4</b> | 991.2623                                   | 1278.3005                                                             |
| <b>5</b> | 1051.2826                                  | 1338.3212                                                             |

## 2. X-ray experiments.

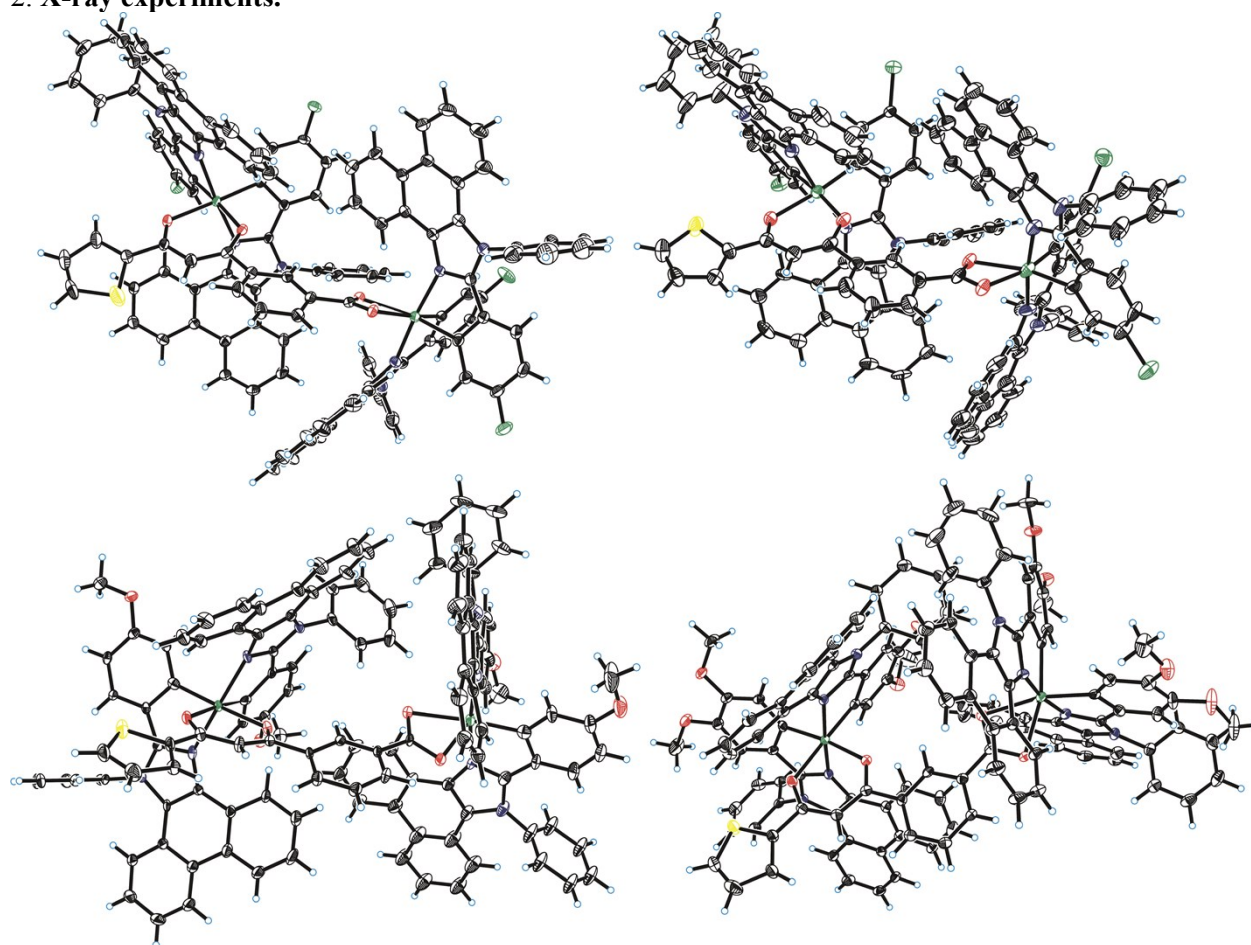

Figure S39. Binuclear structures of reaction products of **1H** (upper left), **2H** (upper right), **4H** (lower left) and **5H** (lower right) with TiO<sub>2</sub>.



Table S2. Details of the X-ray crystal data collection and structure refinement for dimeric compounds

|                                                              | [Ir(dmphi) <sub>2</sub> Cl] <sub>2</sub>                                                                   | [Ir(cphi) <sub>2</sub> Cl] <sub>2</sub>                                                     | [Ir(fphi) <sub>2</sub> Cl] <sub>2</sub>                                                                    | [Ir(mphi) <sub>2</sub> Cl] <sub>2</sub>                                                                    |
|--------------------------------------------------------------|------------------------------------------------------------------------------------------------------------|---------------------------------------------------------------------------------------------|------------------------------------------------------------------------------------------------------------|------------------------------------------------------------------------------------------------------------|
| Empirical formula                                            | C <sub>116</sub> H <sub>84</sub> Ir <sub>2</sub> N <sub>8</sub> O <sub>8</sub> Cl <sub>2</sub><br>+solvent | C <sub>108</sub> H <sub>64</sub> Cl <sub>6</sub> Ir <sub>2</sub> N <sub>8</sub><br>+solvent | C <sub>108</sub> H <sub>64</sub> Cl <sub>2</sub> F <sub>4</sub> Ir <sub>2</sub> N <sub>8</sub><br>+solvent | C <sub>112</sub> H <sub>76</sub> Cl <sub>2</sub> Ir <sub>2</sub> N <sub>8</sub> O <sub>4</sub><br>+solvent |
| M <sub>w</sub>                                               | 2173.21                                                                                                    | 2070.77                                                                                     | 2004.97                                                                                                    | 2053.10                                                                                                    |
| Temperature (K)                                              | 150                                                                                                        | 150                                                                                         | 230                                                                                                        | 150                                                                                                        |
| Size (mm)                                                    | 0.30 x 0.27 x 0.04                                                                                         | 0.35 x 0.20 x 0.07                                                                          | 0.36 x 0.12 x 0.1                                                                                          | 0.30 x 0.18 x 0.05                                                                                         |
| Cryst. system                                                | monoclinic                                                                                                 | triclinic                                                                                   | monoclinic                                                                                                 | triclinic                                                                                                  |
| Space group                                                  | C2/c                                                                                                       | P-1                                                                                         | C2/c                                                                                                       | P-1                                                                                                        |
| <i>a</i> (Å)                                                 | 24.510(3)                                                                                                  | 17.8595(11)                                                                                 | 29.578(10)                                                                                                 | 13.8139(5)                                                                                                 |
| <i>b</i> (Å)                                                 | 22.242(3)                                                                                                  | 18.4756(10)                                                                                 | 24.131(8)                                                                                                  | 19.0358(8)                                                                                                 |
| <i>c</i> (Å)                                                 | 22.805(3)                                                                                                  | 19.4513(11)                                                                                 | 20.493(8)                                                                                                  | 20.5748(7)                                                                                                 |
| $\alpha$ (°)                                                 |                                                                                                            | 69.415(2)                                                                                   |                                                                                                            | 73.4120(10)                                                                                                |
| $\beta$ (°)                                                  | 115.060(2)                                                                                                 | 64.151(2)                                                                                   | 126.799(9)                                                                                                 | 70.6910(10)                                                                                                |
| $\gamma$ (°)                                                 |                                                                                                            | 79.109(2)                                                                                   |                                                                                                            | 74.1020(10)                                                                                                |
| V (Å <sup>3</sup> )                                          | 11262(2)                                                                                                   | 5402.4(5)                                                                                   | 11712(7)                                                                                                   | 4796.1(3)                                                                                                  |
| Z                                                            | 4                                                                                                          | 2                                                                                           | 4                                                                                                          | 2                                                                                                          |
| $\rho_{\text{cald}}$ (g·cm <sup>-3</sup> )                   | 1.282                                                                                                      | 1.273                                                                                       | 1.137                                                                                                      | 1.422                                                                                                      |
| Abs coeff (mm <sup>-1</sup> )                                | 2.463                                                                                                      | 2.655                                                                                       | 2.363                                                                                                      | 2.885                                                                                                      |
| <i>F</i> (000)                                               | 4352                                                                                                       | 2048                                                                                        | 3968                                                                                                       | 2048                                                                                                       |
| $\theta$ range (deg)                                         | 1.98 < $\theta$ < 27.00                                                                                    | 1.94 < $\theta$ < 26.3                                                                      | 1.72 < $\theta$ < 25.05                                                                                    | 2.15 < $\theta$ < 25.01                                                                                    |
| no. of collected/unique rflns                                | 48294/12241                                                                                                | 58725/21930                                                                                 | 28161/10334                                                                                                | 47688/16918                                                                                                |
| Completeness to $\theta$ (%)                                 | 99.5                                                                                                       | 98.8                                                                                        | 99.3                                                                                                       | 99.4                                                                                                       |
| no. of data/restraints/params                                | 12241/6/627                                                                                                | 21930/0/117                                                                                 | 10334/0/560                                                                                                | 16918/0/1157                                                                                               |
| Goodness of fit on <i>F</i> <sup>2</sup>                     | 1.069                                                                                                      | 1.045                                                                                       | 0.979                                                                                                      | 1.027                                                                                                      |
| Final <i>R</i> indices ( <i>I</i> > 2 $\sigma$ ( <i>I</i> )) | R <sub>1</sub> = 0.0502,<br>wR <sub>2</sub> = 0.1117                                                       | R <sub>1</sub> = 0.0485,<br>wR <sub>2</sub> = 0.1327                                        | R <sub>1</sub> = 0.0544,<br>wR <sub>2</sub> = 0.1315                                                       | R <sub>1</sub> = 0.0386,<br>wR <sub>2</sub> = 0.0928                                                       |
| <i>R</i> indices (all data)                                  | R <sub>1</sub> = 0.0751,<br>wR <sub>2</sub> = 0.1197                                                       | R <sub>1</sub> = 0.0612,<br>wR <sub>2</sub> = 0.1405                                        | R <sub>1</sub> = 0.0914,<br>wR <sub>2</sub> = 0.1488                                                       | R <sub>1</sub> = 0.0460,<br>wR <sub>2</sub> = 0.0963                                                       |
| Largest diff peak/hole (e/Å <sup>3</sup> )                   | 1.96/-2.44                                                                                                 | 3.94/-2.83                                                                                  | 1.57/-2.60                                                                                                 | 3.28/-0.78                                                                                                 |

Table S3. Details of the X-ray crystal data collection and structure refinement for complexes 1 – 5.

|                                                              | 1                                                                                                                        | 2                                                                                                                         | 3                                                                                             | 4                                                                                                                                | 5                                                                                             |
|--------------------------------------------------------------|--------------------------------------------------------------------------------------------------------------------------|---------------------------------------------------------------------------------------------------------------------------|-----------------------------------------------------------------------------------------------|----------------------------------------------------------------------------------------------------------------------------------|-----------------------------------------------------------------------------------------------|
| Empirical formula                                            | C <sub>69</sub> H <sub>43</sub> IrN <sub>4</sub> O <sub>4</sub> F <sub>2</sub> S·<br>0.5 CH <sub>2</sub> Cl <sub>2</sub> | C <sub>69</sub> H <sub>43</sub> IrN <sub>4</sub> O <sub>4</sub> Cl <sub>2</sub> S·<br>1.3 CH <sub>2</sub> Cl <sub>2</sub> | C <sub>69</sub> H <sub>45</sub> IrN <sub>4</sub> O <sub>4</sub> S·<br>0.65 CH <sub>3</sub> CN | C <sub>71</sub> H <sub>49</sub> IrN <sub>4</sub> O <sub>6</sub> S·<br>1.3 CH <sub>2</sub> Cl <sub>2</sub> ·0.27 H <sub>2</sub> O | C <sub>73</sub> H <sub>53</sub> IrN <sub>4</sub> O <sub>8</sub> S·<br>0.45 CH <sub>3</sub> OH |
| M <sub>w</sub>                                               | 1381.72                                                                                                                  | 1397.64                                                                                                                   | 1245.03                                                                                       | 1538.04                                                                                                                          | 1352.87                                                                                       |
| Temperature (K)                                              | 100                                                                                                                      | 150                                                                                                                       | 150                                                                                           | 150                                                                                                                              | 150                                                                                           |
| Size (mm)                                                    | 0.20 x 0.12 x 0.10                                                                                                       | 0.20 x 0.18 x 0.12                                                                                                        | 0.30 x 0.25 x 0.05                                                                            | 0.17 x 0.14 x 0.08                                                                                                               | 0.32 x 0.23 x 0.18                                                                            |
| Cryst. system                                                | monoclinic                                                                                                               | triclinic                                                                                                                 | Triclinic                                                                                     | triclinic                                                                                                                        | orthorhombic                                                                                  |
| Space group                                                  | C2/c                                                                                                                     | P-1                                                                                                                       | P-1                                                                                           | P-1                                                                                                                              | Pna2 <sub>1</sub>                                                                             |
| <i>a</i> (Å)                                                 | 23.5656(15)                                                                                                              | 14.6748(9)                                                                                                                | 15.7615(4)                                                                                    | 11.3617(4)                                                                                                                       | 23.0818(17)                                                                                   |
| <i>b</i> (Å)                                                 | 17.6138(11)                                                                                                              | 15.3911(8)                                                                                                                | 19.7594(6)                                                                                    | 11.4387(4)                                                                                                                       | 11.7771(8)                                                                                    |
| <i>c</i> (Å)                                                 | 29.183(2)                                                                                                                | 15.5092(10)                                                                                                               | 21.2004(6)                                                                                    | 25.1626(9)                                                                                                                       | 22.3446(16)                                                                                   |
| <i>α</i> (°)                                                 |                                                                                                                          | 93.940(2)                                                                                                                 | 84.9820(10)                                                                                   | 87.1280(10)                                                                                                                      |                                                                                               |
| <i>β</i> (°)                                                 | 98.663(2)                                                                                                                | 107.762(2)                                                                                                                | 68.2350(10)                                                                                   | 82.5430(10)                                                                                                                      |                                                                                               |
| <i>γ</i> (°)                                                 |                                                                                                                          | 106.996(2)                                                                                                                | 77.2280(10)                                                                                   | 82.4970(10)                                                                                                                      |                                                                                               |
| V (Å <sup>3</sup> )                                          | 11974.9(13)                                                                                                              | 3141.9(3)                                                                                                                 | 5980.1(3)                                                                                     | 3213.0(2)                                                                                                                        | 6074.1(7)                                                                                     |
| Z                                                            | 8                                                                                                                        | 2                                                                                                                         | 4                                                                                             | 2                                                                                                                                | 4                                                                                             |
| $\rho_{\text{calc}}$ (g·cm <sup>-3</sup> )                   | 1.533                                                                                                                    | 1.477                                                                                                                     | 1.383                                                                                         | 1.590                                                                                                                            | 1.479                                                                                         |
| Abs coeff (mm <sup>-1</sup> )                                | 2.460                                                                                                                    | 2.406                                                                                                                     | 2.320                                                                                         | 2.419                                                                                                                            | 2.296                                                                                         |
| <i>F</i> (000)                                               | 5528                                                                                                                     | 1397                                                                                                                      | 2505                                                                                          | 1545                                                                                                                             | 2736                                                                                          |
| $\theta$ range (deg)                                         | 1.75 < $\theta$ < 25.05                                                                                                  | 2.37 < $\theta$ < 25.03                                                                                                   | 2.11 < $\theta$ < 25.05                                                                       | 2.29 < $\theta$ < 30.54                                                                                                          | 1.94 < $\theta$ < 29.00                                                                       |
| no. of collected/unique rflns                                | 57032/10610                                                                                                              | 45730/10988                                                                                                               | 50466/21080                                                                                   | 38911 / 19375                                                                                                                    | 70959/16116                                                                                   |
| Completeness to $\theta$ (%)                                 | 99.9                                                                                                                     | 98.9                                                                                                                      | 99.5                                                                                          | 98.3                                                                                                                             | 99.9                                                                                          |
| no. of data/restraints/params                                | 10610/15/627                                                                                                             | 10988/42/750                                                                                                              | 21080/123/1426                                                                                | 19375 / 0 / 836                                                                                                                  | 16116/10/699                                                                                  |
| Goodness of fit on <i>F</i> <sup>2</sup>                     | 1.061                                                                                                                    | 1.046                                                                                                                     | 1.066                                                                                         | 1.043                                                                                                                            | 1.023                                                                                         |
| Final <i>R</i> indices ( <i>I</i> > 2 $\sigma$ ( <i>I</i> )) | R <sub>1</sub> = 0.0733,<br>wR <sub>2</sub> = 0.2026                                                                     | R <sub>1</sub> = 0.0699,<br>wR <sub>2</sub> = 0.1847                                                                      | R <sub>1</sub> = 0.0528,<br>wR <sub>2</sub> = 0.1554                                          | R <sub>1</sub> = 0.0427,<br>wR <sub>2</sub> = 0.0986                                                                             | R <sub>1</sub> = 0.0400,<br>wR <sub>2</sub> = 0.0964                                          |
| <i>R</i> indices (all data)                                  | R <sub>1</sub> = 0.0930,<br>wR <sub>2</sub> = 0.2188                                                                     | R <sub>1</sub> = 0.0934,<br>wR <sub>2</sub> = 0.2006                                                                      | R <sub>1</sub> = 0.0727,<br>wR <sub>2</sub> = 0.1676                                          | R <sub>1</sub> = 0.0531,<br>wR <sub>2</sub> = 0.1028                                                                             | R <sub>1</sub> = 0.0493,<br>wR <sub>2</sub> = 0.1010                                          |
| Largest diff peak/hole (e/Å <sup>3</sup> )                   | 2.72/-1.56                                                                                                               | 2.17/-1.85                                                                                                                | 2.26/-1.51                                                                                    | 1.91 /-1.51                                                                                                                      | 1.59/-1.16                                                                                    |

Table S4. Details of the X-ray crystal data collection and structure refinement for binuclear compounds obtained by partial decomposition of hydrolysed complexes (**1H** – **5H**)

|                                                              | <b>1H</b>                                                                                                                  | <b>2H</b>                                                                                                                 | <b>3H</b>                                                                                                           | <b>4H</b>                                                                                                 | <b>5H</b>                                                                                                  |
|--------------------------------------------------------------|----------------------------------------------------------------------------------------------------------------------------|---------------------------------------------------------------------------------------------------------------------------|---------------------------------------------------------------------------------------------------------------------|-----------------------------------------------------------------------------------------------------------|------------------------------------------------------------------------------------------------------------|
| Empirical formula                                            | C <sub>122</sub> H <sub>72</sub> Ir <sub>2</sub> N <sub>8</sub> O <sub>4</sub> F <sub>4</sub> S·<br>4.5 CH <sub>3</sub> CN | C <sub>122</sub> H <sub>72</sub> Cl <sub>4</sub> Ir <sub>2</sub> N <sub>8</sub> O <sub>4</sub> S·<br>7 CH <sub>3</sub> CN | C <sub>122</sub> H <sub>76</sub> Ir <sub>2</sub> N <sub>8</sub> O <sub>4</sub> S·<br>0.5 CH <sub>3</sub> CN+solvent | C <sub>126</sub> H <sub>84</sub> Ir <sub>2</sub> N <sub>8</sub> O <sub>8</sub> S<br>·5 CH <sub>3</sub> CN | C <sub>130</sub> H <sub>92</sub> Ir <sub>2</sub> N <sub>8</sub> O <sub>12</sub> S·<br>7 CH <sub>3</sub> CN |
| M <sub>w</sub>                                               | 2391.07                                                                                                                    | 2354.24                                                                                                                   | 2175.42                                                                                                             | 2459.79                                                                                                   | 2661.95                                                                                                    |
| Temperature (K)                                              | 100                                                                                                                        | 100                                                                                                                       | 150                                                                                                                 | 100                                                                                                       | 100                                                                                                        |
| Size (mm)                                                    | 0.12 x 0.10 x 0.03                                                                                                         | 0.20 x 0.10 x 0.02                                                                                                        | 0.16 x 0.08 x 0.07                                                                                                  | 0.14 x 0.11 x 0.09                                                                                        | 0.15 x 0.12 x 0.07                                                                                         |
| Cryst. system                                                | triclinic                                                                                                                  | triclinic                                                                                                                 | triclinic                                                                                                           | triclinic                                                                                                 | triclinic                                                                                                  |
| Space group                                                  | P-1                                                                                                                        | P-1                                                                                                                       | P-1                                                                                                                 | P-1                                                                                                       | P-1                                                                                                        |
| <i>a</i> (Å)                                                 | 17.471(2)                                                                                                                  | 12.202(3)                                                                                                                 | 13.7602(5)                                                                                                          | 15.9214(10)                                                                                               | 14.2021(15)                                                                                                |
| <i>b</i> (Å)                                                 | 17.750(2)                                                                                                                  | 20.438(5)                                                                                                                 | 18.4965(5)                                                                                                          | 19.4903(12)                                                                                               | 19.393(2)                                                                                                  |
| <i>c</i> (Å)                                                 | 18.145(2)                                                                                                                  | 21.092(6)                                                                                                                 | 22.4727(6)                                                                                                          | 20.8240(13)                                                                                               | 23.025(2)                                                                                                  |
| <i>α</i> (°)                                                 | 104.068(4)                                                                                                                 | 99.336(8)                                                                                                                 | 111.7180(10)                                                                                                        | 89.263(2)                                                                                                 | 105.080(3)                                                                                                 |
| <i>β</i> (°)                                                 | 107.253(2)                                                                                                                 | 101.460(9)                                                                                                                | 97.9180(10)                                                                                                         | 69.208(2)                                                                                                 | 101.124(3)                                                                                                 |
| <i>γ</i> (°)                                                 | 93.552(4)                                                                                                                  | 102.695(8)                                                                                                                | 105.2410(10)                                                                                                        | 68.446(2)                                                                                                 | 90.032(4)                                                                                                  |
| V (Å <sup>3</sup> )                                          | 5157.9(10)                                                                                                                 | 4911(2)                                                                                                                   | 4947.4(3)                                                                                                           | 5567.1(6)                                                                                                 | 5999.5(11)                                                                                                 |
| Z                                                            | 2                                                                                                                          | 2                                                                                                                         | 2                                                                                                                   | 2                                                                                                         | 2                                                                                                          |
| $\rho_{\text{calcd}}$ (g·cm <sup>-3</sup> )                  | 1.540                                                                                                                      | 1.592                                                                                                                     | 1.460                                                                                                               | 1.467                                                                                                     | 1.474                                                                                                      |
| Abs coeff (mm <sup>-1</sup> )                                | 2.671                                                                                                                      | 2.902                                                                                                                     | 2.770                                                                                                               | 2.474                                                                                                     | 2.305                                                                                                      |
| <i>F</i> (000)                                               | 2394                                                                                                                       | 2348                                                                                                                      | 2176                                                                                                                | 2480                                                                                                      | 2691                                                                                                       |
| $\theta$ range (deg)                                         | 1.98 < $\theta$ < 26.00                                                                                                    | 1.94 < $\theta$ < 25.05                                                                                                   | 2.00 < $\theta$ < 26.38                                                                                             | 2.15 < $\theta$ < 26.00                                                                                   | 2.00 < $\theta$ < 26.00                                                                                    |
| no. of collected/unique rflns                                | 84068/20266                                                                                                                | 83692/17415                                                                                                               | 54309/20035                                                                                                         | 89775/21855                                                                                               | 98817/23568                                                                                                |
| Completeness to $\theta$ (%)                                 | 99.9                                                                                                                       | 100                                                                                                                       | 99.0                                                                                                                | 99.8                                                                                                      | 99.9                                                                                                       |
| no. of data/restraints/params                                | 20266/27/1408                                                                                                              | 17415/7/1224                                                                                                              | 20035/556/1373                                                                                                      | 21855/22/1406                                                                                             | 23568/9/1582                                                                                               |
| Goodness of fit on <i>F</i> <sup>2</sup>                     | 1.035                                                                                                                      | 0.999                                                                                                                     | 1.014                                                                                                               | 1.023                                                                                                     | 1.036                                                                                                      |
| Final <i>R</i> indices ( <i>I</i> > 2 $\sigma$ ( <i>I</i> )) | R <sub>1</sub> = 0.0297,<br>wR <sub>2</sub> = 0.0694                                                                       | R <sub>1</sub> = 0.0531,<br>wR <sub>2</sub> = 0.0922                                                                      | R <sub>1</sub> = 0.0365,<br>wR <sub>2</sub> = 0.0793                                                                | R <sub>1</sub> = 0.0424,<br>wR <sub>2</sub> = 0.1041                                                      | R <sub>1</sub> = 0.0346,<br>wR <sub>2</sub> = 0.0648                                                       |
| <i>R</i> indices (all data)                                  | R <sub>1</sub> = 0.0405,<br>wR <sub>2</sub> = 0.0748                                                                       | R <sub>1</sub> = 0.1229,<br>wR <sub>2</sub> = 0.1154                                                                      | R <sub>1</sub> = 0.0537,<br>wR <sub>2</sub> = 0.0858                                                                | R <sub>1</sub> = 0.0598,<br>wR <sub>2</sub> = 0.1141                                                      | R <sub>1</sub> = 0.0510,<br>wR <sub>2</sub> = 0.0693                                                       |
| Largest diff peak/hole<br>(e/Å <sup>3</sup> )                | 1.96/-1.80                                                                                                                 | 1.07/-1.28                                                                                                                | 1.45/-0.92                                                                                                          | 2.10/-1.80                                                                                                | 2.35/-1.87                                                                                                 |

Table S5. Selected bond lengths [ $\text{\AA}$ ] and angles [ $^\circ$ ] in structures of the complexes

|            |                                        |                                        |                                     |                                     |                                        |                                     |                                     |
|------------|----------------------------------------|----------------------------------------|-------------------------------------|-------------------------------------|----------------------------------------|-------------------------------------|-------------------------------------|
| Complex 1  | $\text{Ir}_1\text{-C}_1$               | $\text{Ir}_1\text{-C}_{28}$            | $\text{Ir}_1\text{-N}_1$            | $\text{Ir}_1\text{-N}_3$            | $\text{Ir}_1\text{-O}_4$               | $\text{Ir}_1\text{-O}_3$            |                                     |
|            | 1.989(10)                              | 2.020(10)                              | 2.091(8)                            | 2.056(8)                            | 2.140(6)                               | 2.181(6)                            |                                     |
|            | $\text{C}_1\text{-Ir}_1\text{-C}_{28}$ | $\text{N}_1\text{-Ir}_1\text{-C}_{28}$ | $\text{C}_1\text{-Ir}_1\text{-N}_3$ | $\text{C}_1\text{-Ir}_1\text{-O}_3$ | $\text{C}_{28}\text{-Ir}_1\text{-O}_4$ | $\text{N}_1\text{-Ir}_1\text{-O}_3$ | $\text{N}_3\text{-Ir}_1\text{-O}_4$ |
|            | 95.0(4)                                | 98.7(3)                                | 95.3(4)                             | 93.7(3)                             | 85.5(3)                                | 80.2(3)                             | 80.9(3)                             |
| Complex 2  | $\text{Ir}_1\text{-C}_{28}$            | $\text{Ir}_1\text{-C}_1$               | $\text{Ir}_1\text{-N}_3$            | $\text{Ir}_1\text{-N}_1$            | $\text{Ir}_1\text{-O}_4$               | $\text{Ir}_1\text{-O}_3$            |                                     |
|            | 1.979(11)                              | 1.993(9)                               | 2.072(7)                            | 2.066(7)                            | 2.155(6)                               | 2.115(6)                            |                                     |
|            | $\text{C}_1\text{-Ir}_1\text{-C}_{28}$ | $\text{N}_1\text{-Ir}_1\text{-C}_{28}$ | $\text{C}_1\text{-Ir}_1\text{-N}_3$ | $\text{C}_1\text{-Ir}_1\text{-O}_3$ | $\text{C}_{28}\text{-Ir}_1\text{-O}_4$ | $\text{N}_1\text{-Ir}_1\text{-O}_4$ | $\text{N}_3\text{-Ir}_1\text{-O}_3$ |
|            | 95.6(4)                                | 79.5(3)                                | 79.5(3)                             | 86.2(3)                             | 91.2(3)                                | 81.8(3)                             | 80.1(3)                             |
| Complex 3* | $\text{Ir}_1\text{-C}_1$               | $\text{Ir}_1\text{-C}_{28}$            | $\text{Ir}_1\text{-N}_1$            | $\text{Ir}_1\text{-N}_3$            | $\text{Ir}_1\text{-O}_4$               | $\text{Ir}_1\text{-O}_3$            |                                     |
|            | 1.998(6)                               | 1.989(6)                               | 2.066(5)                            | 2.063(5)                            | 2.147(4)                               | 2.152(4)                            |                                     |
|            | $\text{C}_1\text{-Ir}_1\text{-C}_{28}$ | $\text{N}_1\text{-Ir}_1\text{-C}_{28}$ | $\text{C}_1\text{-Ir}_1\text{-N}_3$ | $\text{C}_1\text{-Ir}_1\text{-O}_3$ | $\text{C}_{28}\text{-Ir}_1\text{-O}_4$ | $\text{N}_1\text{-Ir}_1\text{-O}_3$ | $\text{N}_3\text{-Ir}_1\text{-O}_4$ |
|            | 96.9(2)                                | 96.0(2)                                | 97.5(2)                             | 88.0(2)                             | 90.2(2)                                | 81.08(17)                           | 80.69(19)                           |
| Complex 4  | $\text{Ir}_1\text{-C}_1$               | $\text{Ir}_1\text{-C}_{28}$            | $\text{Ir}_1\text{-N}_1$            | $\text{Ir}_1\text{-N}_3$            | $\text{Ir}_1\text{-O}_3$               | $\text{Ir}_1\text{-O}_4$            |                                     |
|            | 1.993(3)                               | 1.979(3)                               | 2.053(3)                            | 2.073(3)                            | 2.173(2)                               | 2.138(2)                            |                                     |
|            | $\text{C}_1\text{-Ir}_1\text{-C}_{28}$ | $\text{N}_1\text{-Ir}_1\text{-C}_{28}$ | $\text{C}_1\text{-Ir}_1\text{-N}_3$ | $\text{C}_1\text{-Ir}_1\text{-O}_3$ | $\text{C}_{28}\text{-Ir}_1\text{-O}_4$ | $\text{N}_3\text{-Ir}_1\text{-O}_3$ | $\text{N}_1\text{-Ir}_1\text{-O}_4$ |
|            | 94.15(13)                              | 80.06(12)                              | 79.93(12)                           | 95.14(11)                           | 86.45(12)                              | 80.10(10)                           | 81.11(10)                           |
| Complex 5  | $\text{Ir}_1\text{-C}_1$               | $\text{Ir}_1\text{-C}_{28}$            | $\text{Ir}_1\text{-N}_1$            | $\text{Ir}_1\text{-N}_3$            | $\text{Ir}_1\text{-O}_4$               | $\text{Ir}_1\text{-O}_3$            |                                     |
|            | 1.993(6)                               | 1.988(6)                               | 2.060(5)                            | 2.068(5)                            | 2.153(5)                               | 2.161(4)                            |                                     |
|            | $\text{C}_1\text{-Ir}_1\text{-C}_{28}$ | $\text{N}_1\text{-Ir}_1\text{-C}_{28}$ | $\text{C}_1\text{-Ir}_1\text{-N}_3$ | $\text{C}_1\text{-Ir}_1\text{-O}_3$ | $\text{C}_{28}\text{-Ir}_1\text{-O}_4$ | $\text{N}_1\text{-Ir}_1\text{-O}_3$ | $\text{N}_3\text{-Ir}_1\text{-O}_4$ |
|            | 98.0(2)                                | 95.2(2)                                | 99.2(2)                             | 88.0(2)                             | 88.5(2)                                | 83.47(18)                           | 80.2(2)                             |

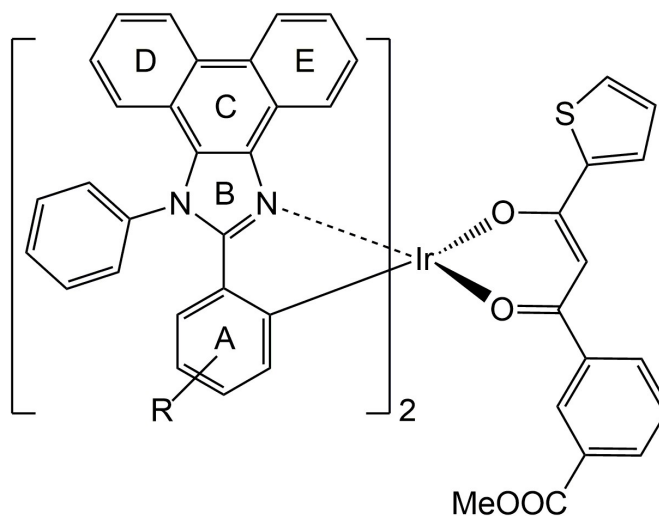

Figure S40. Labelling of planes in phenanthroimidazole ligands

Table S6. Angles between various planes in phenanthroimidazoles in structures of the complexes

**Complex 1**

| Angle[°] | A       | B      | C      | D       | E       |
|----------|---------|--------|--------|---------|---------|
| A        |         | 6.0(4) | 9.5(4) | 10.2(4) | 13.5(4) |
| B        | 11.9(4) |        | 5.0(4) | 8.6(4)  | 8.9(4)  |
| C        | 16.9(4) | 5.1(4) |        | 4.9(4)  | 4.0(4)  |
| D        | 17.3(4) | 7.5(4) | 4.7(6) |         | 6.2(4)  |
| E        | 20.4(4) | 8.8(4) | 3.7(4) | 5.1(4)  |         |

**Complex 2**

| Angle[°] | A       | B       | C       | D       | E       |
|----------|---------|---------|---------|---------|---------|
| A        |         | 11.9(4) | 15.2(4) | 14.8(4) | 17.5(4) |
| B        | 7.1(4)  |         | 3.8(3)  | 5.7(3)  | 6.2(4)  |
| C        | 8.7(3)  | 3.5(3)  |         | 3.5(4)  | 2.4(4)  |
| D        | 4.2(4)  | 3.4(4)  | 4.6(4)  |         | 3.9(3)  |
| E        | 15.3(3) | 10.8(3) | 7.4(3)  | 11.5(3) |         |

**Complex 3\***

| Angle[°] | A       | B       | C      | D      | E       |
|----------|---------|---------|--------|--------|---------|
| A        |         | 7.5(3)  | 5.1(2) | 3.2(3) | 11.1(2) |
| B        | 12.9(3) |         | 4.2(2) | 7.8(3) | 11.0(2) |
| C        | 18.5(2) | 6.6(3)  |        | 7.2(2) | 7.6(3)  |
| D        | 18.2(2) | 7.4(2)  | 2.1(3) |        | 14.0(3) |
| E        | 22.1(2) | 11.3(2) | 5.0(3) | 4.1(2) |         |

**Complex 4**

| Angle[°] | A       | B       | C       | D       | E       |
|----------|---------|---------|---------|---------|---------|
| A        |         | 11.1(3) | 15.2(4) | 12.8(4) | 24.5(6) |
| B        | 12.2(3) |         | 5.6(3)  | 9.6(4)  | 14.7(3) |
| C        | 12.1(4) | 1.8(4)  |         | 7.6(4)  | 9.4(4)  |
| D        | 11.7(4) | 0.5(4)  | 1.5(4)  |         | 14.3(4) |
| E        | 12.6(4) | 4.6(3)  | 2.8(5)  | 4.3(3)  |         |

**Complex 5**

| Angle[°] | A       | B       | C      | D       | E       |
|----------|---------|---------|--------|---------|---------|
| A        |         | 2.8(4)  | 8.9(3) | 11.1(4) | 16.1(5) |
| B        | 16.8(3) |         | 6.3(3) | 10.0(4) | 13.4(4) |
| C        | 20.9(4) | 6.9(4)  |        | 7.2(4)  | 7.9(4)  |
| D        | 18.0(4) | 10.3(3) | 6.4(4) |         | 13.4(4) |
| E        | 29.2(4) | 15.2(4) | 8.7(4) | 12.1(4) |         |

\* in structure of complex 3 two independent molecules were observed, data is given for less disordered one

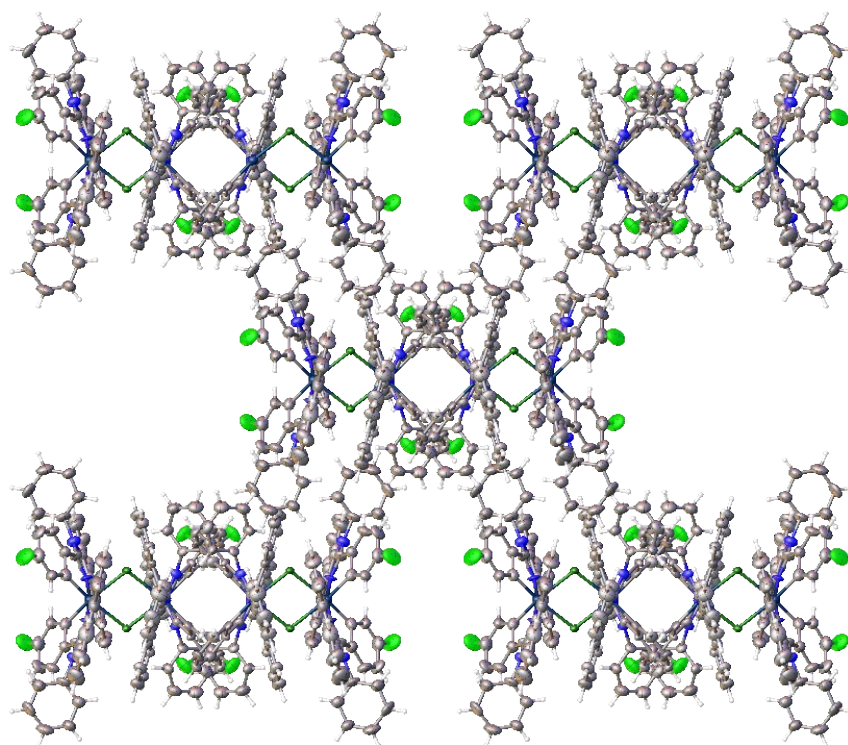

Figure S41. Fragment of the crystal packing of  $[\text{Ir}(\text{fphi})_2\text{Cl}]_2$  Image along 2 axis.

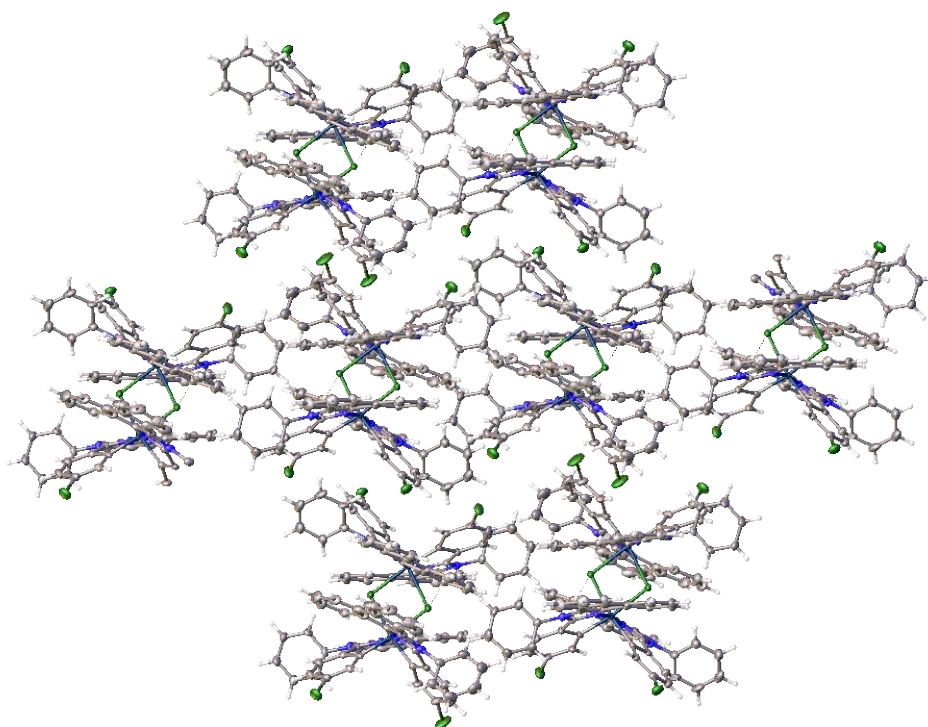

Figure S42. Fragment of the crystal packing of  $[\text{Ir}(\text{cphi})_2\text{Cl}]_2$  Image along 2 axis.

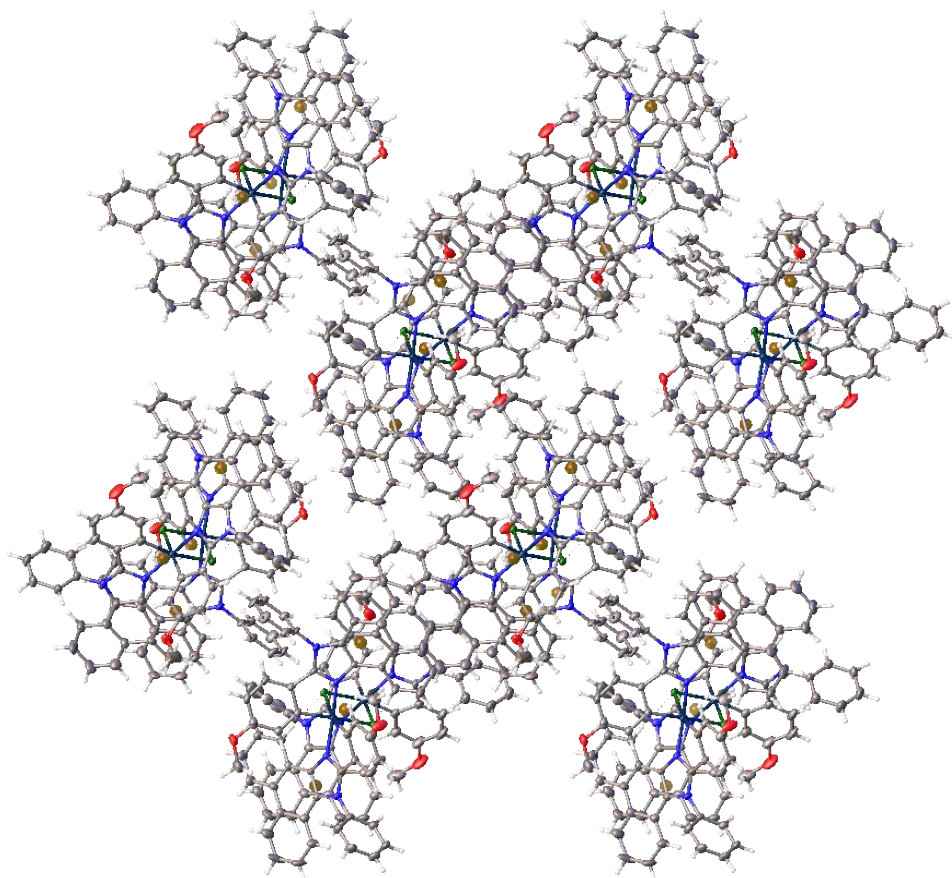

Figure S43. Fragment of the crystal packing of  $[\text{Ir}(\text{mphi})_2\text{Cl}]_2$

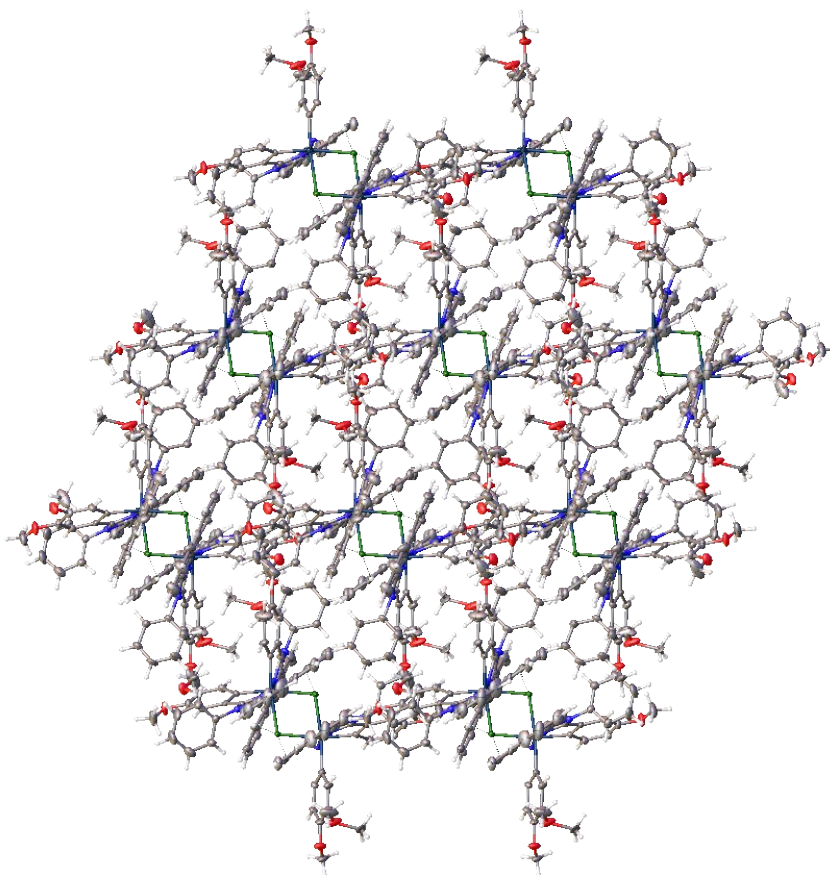

Figure S44. Fragment of the crystal packing of  $[\text{Ir}(\text{dmphi})_2\text{Cl}]_2$  Image along 2 axis.

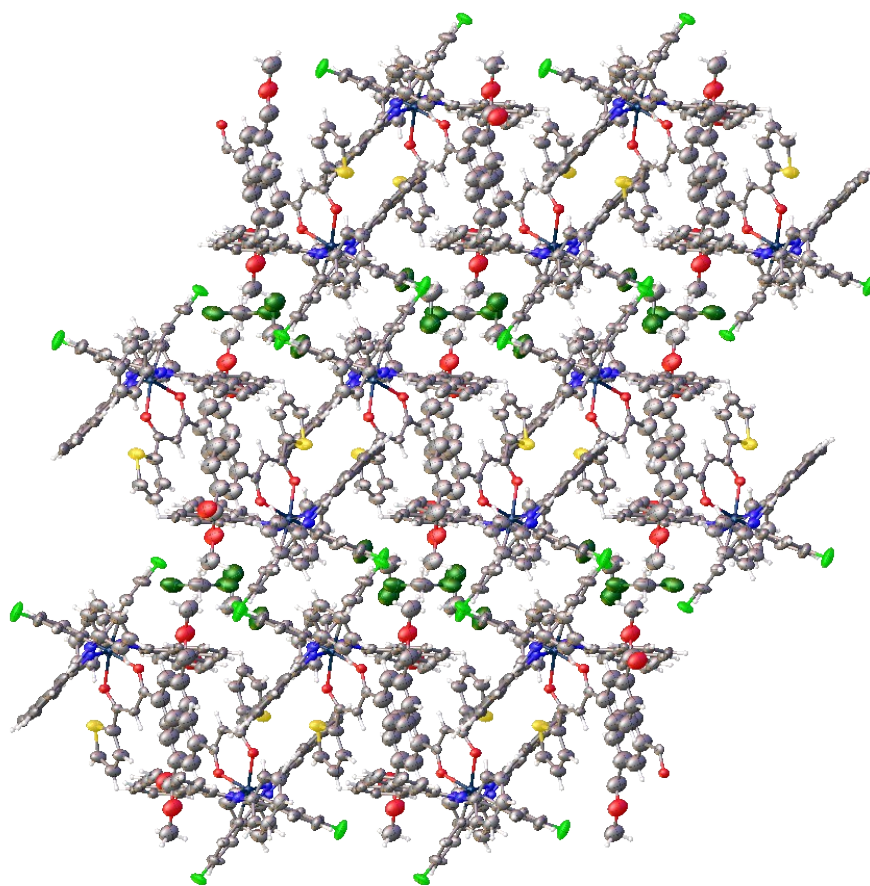

Figure S45. Fragment of the crystal packing of complex **1**. Image along 2 axis; minor components of disordered groups are not shown.

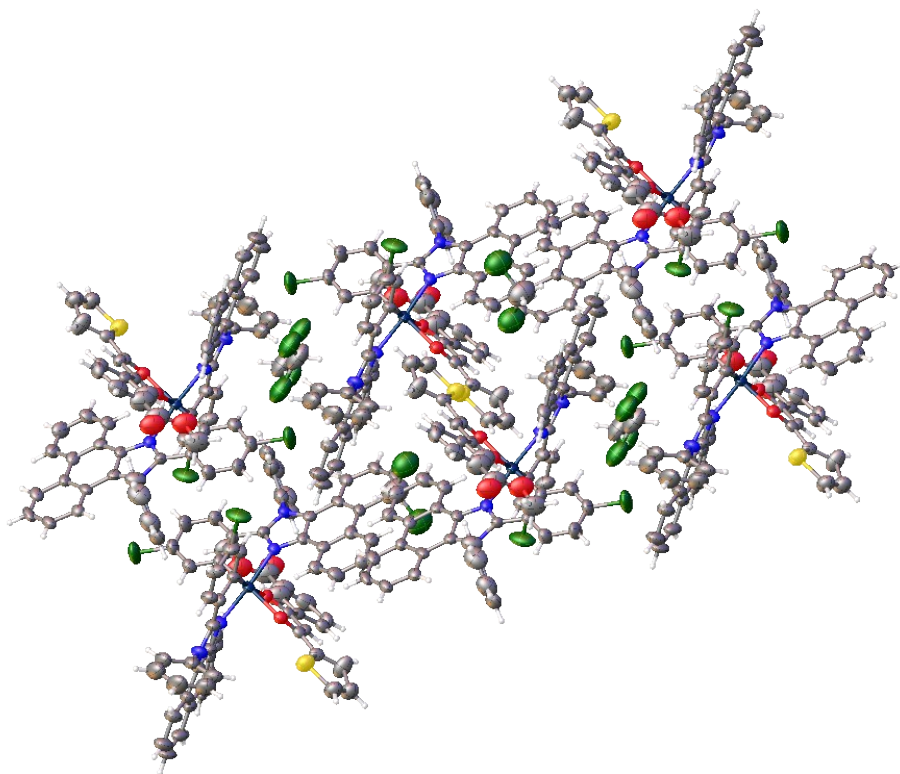

Figure S46. Fragment of the crystal packing of complex **2**. Minor components of disordered groups are not shown.



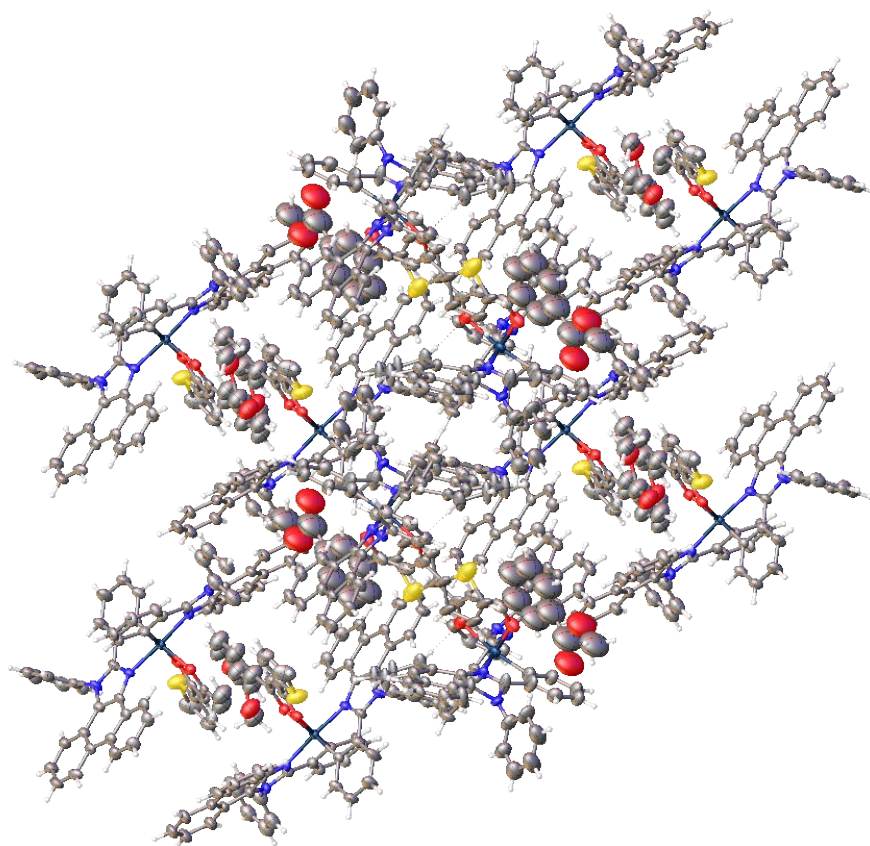

Figure S47. Fragment of the crystal packing of complex **3**. Minor components of disordered groups are not shown.

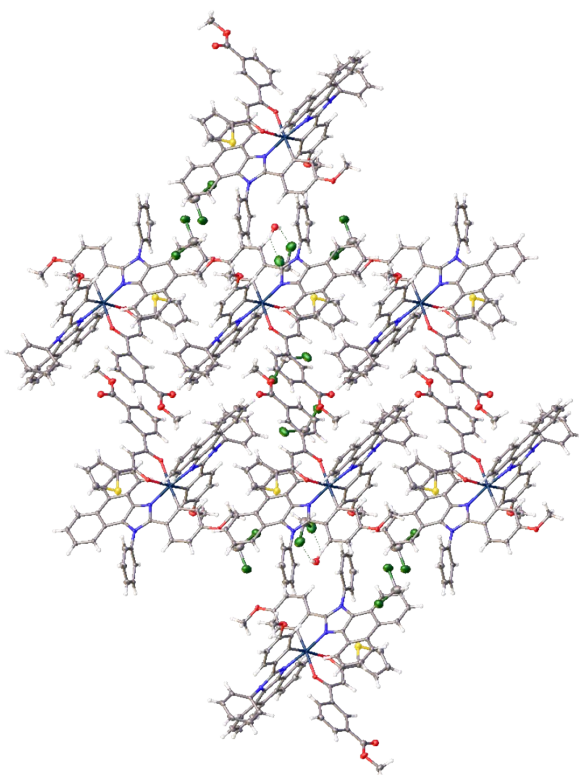

Figure S48. Fragment of the crystal packing of complex **4**.

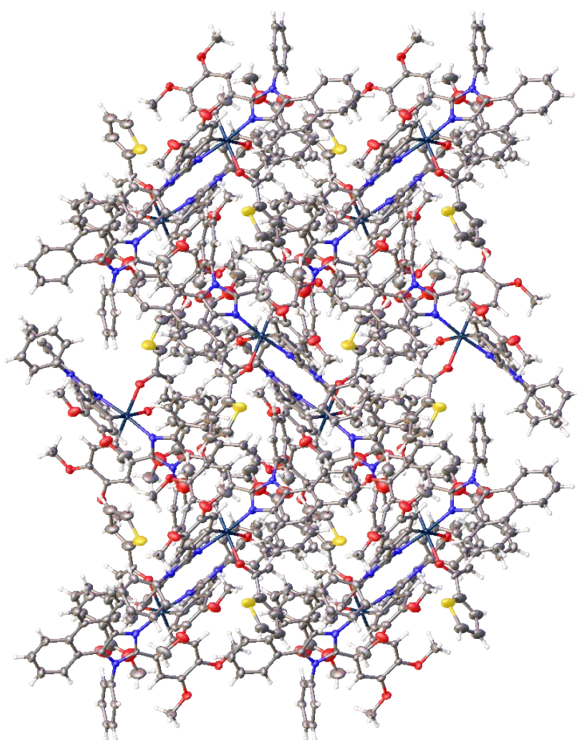

Figure S49. Fragment of the crystal packing of complex **5**. Image along  $2_1$  axis; minor components of disordered groups are not shown.

### 3. Redox and optical properties.

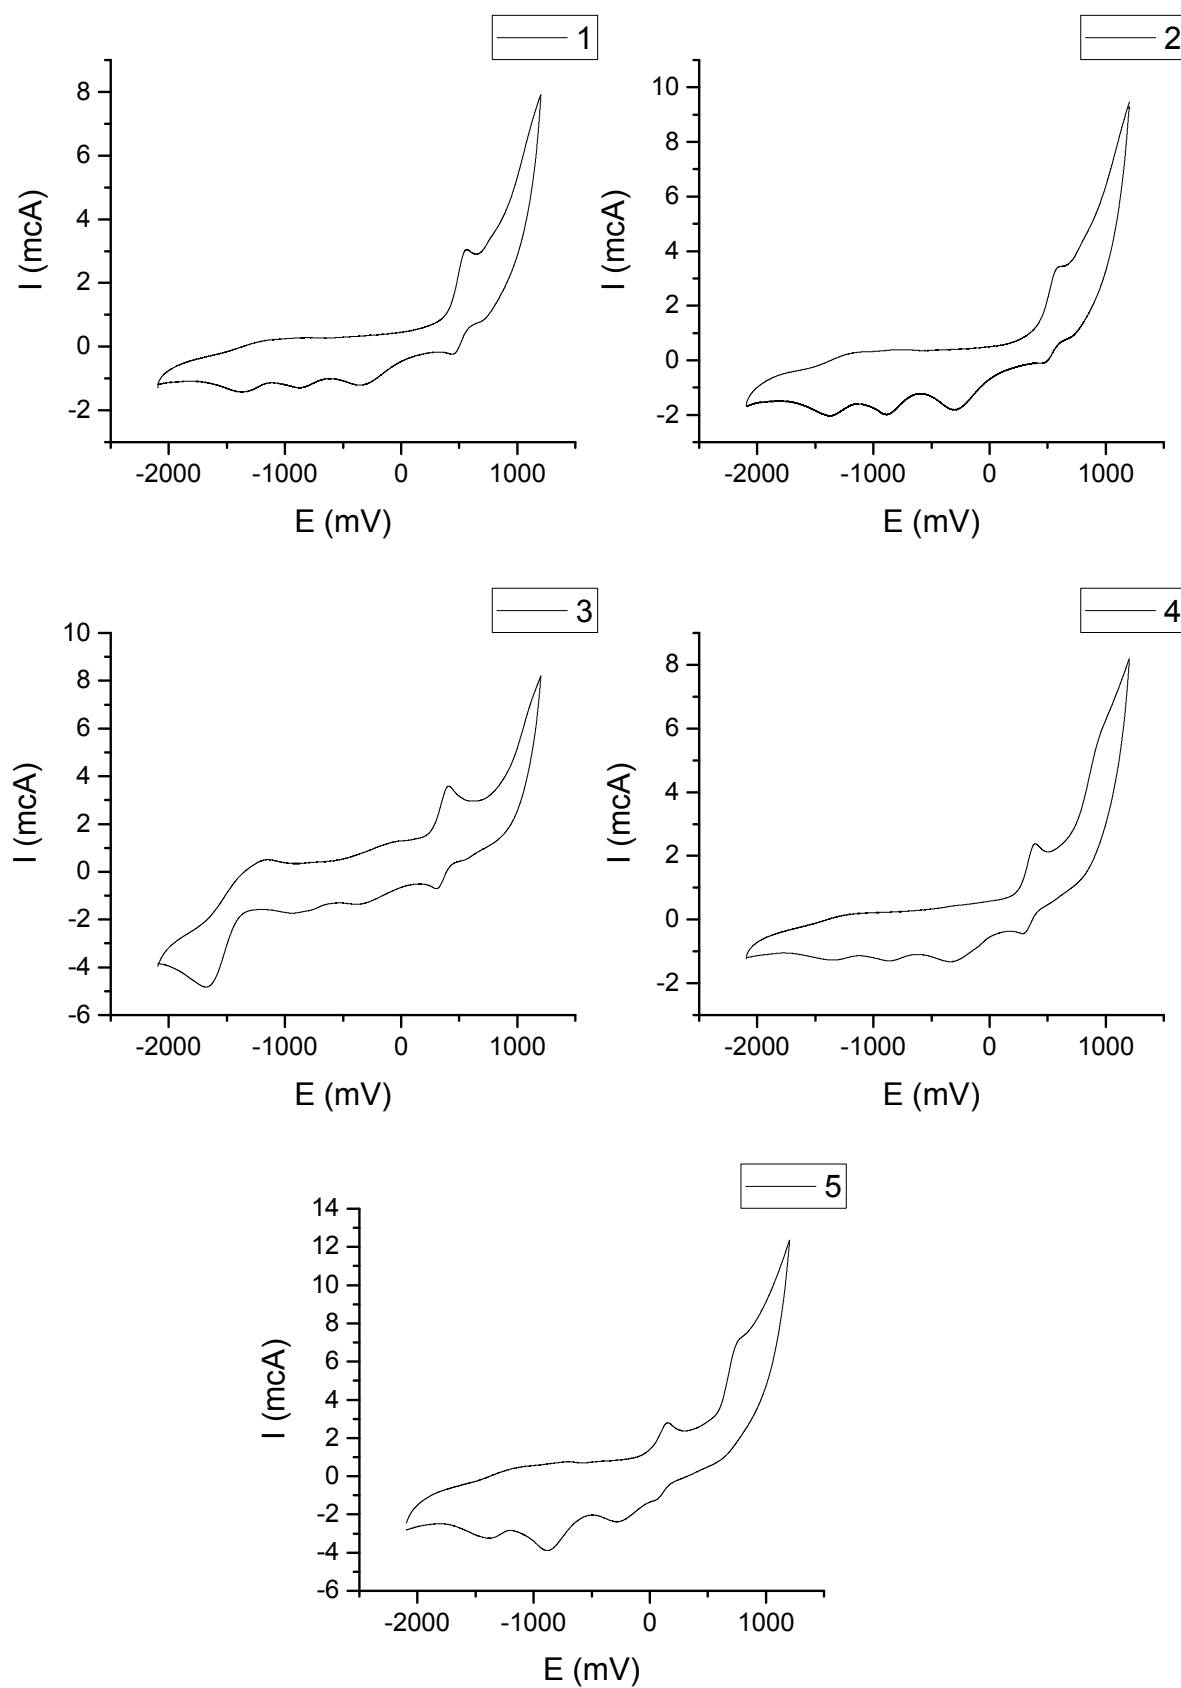

Figure S50. Cyclic voltammetry curves of complexes **1** – **5** measured versus ferrocene in Ar-saturated N,N-dimethylformamide (electrolyte – 0.1 M  $\text{NBu}_4\text{PF}_6$ ) at a scan rate of 50 mV/s.

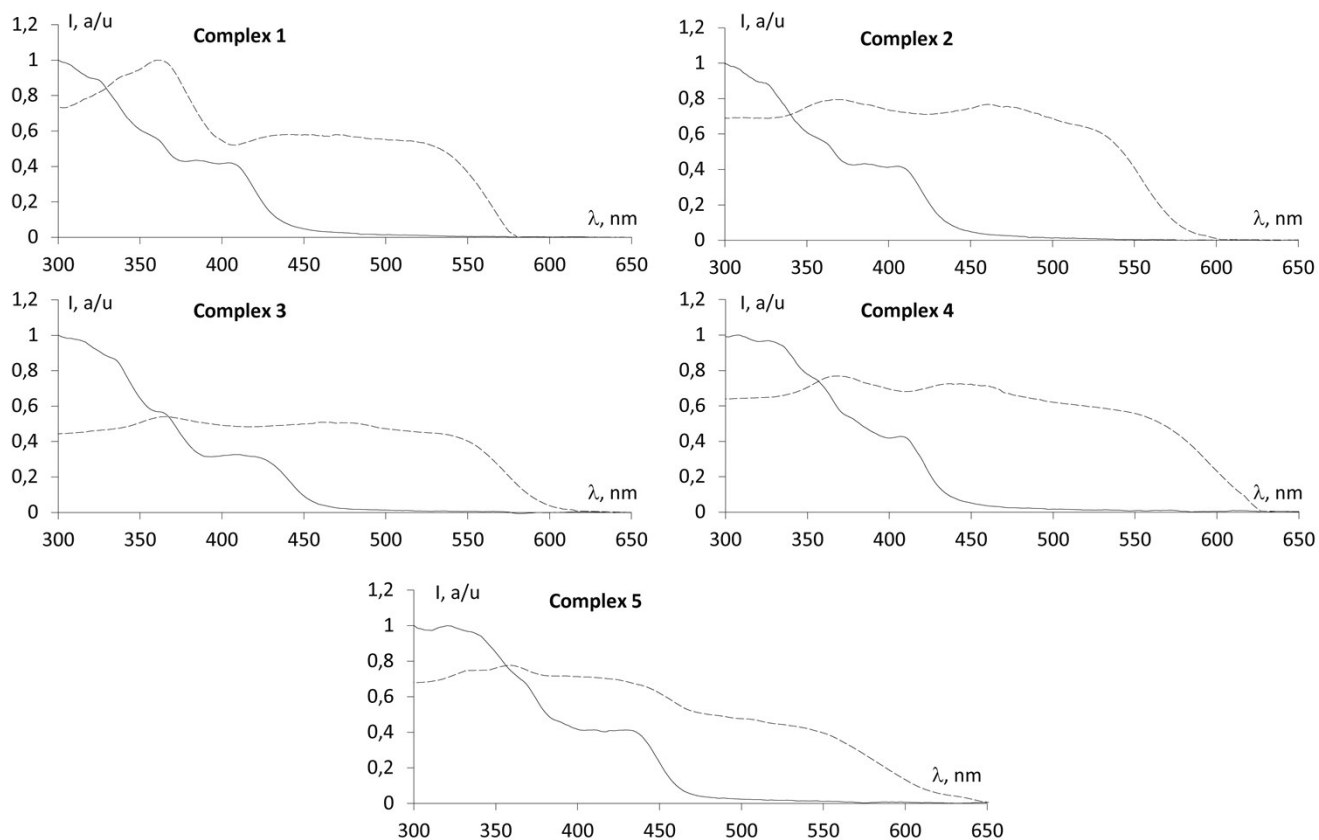

Figure S51. Excitation (---) and absorption (—) spectra of complexes **1** – **5** measured in  $\text{CH}_2\text{Cl}_2$  at  $25^\circ\text{C}$ .

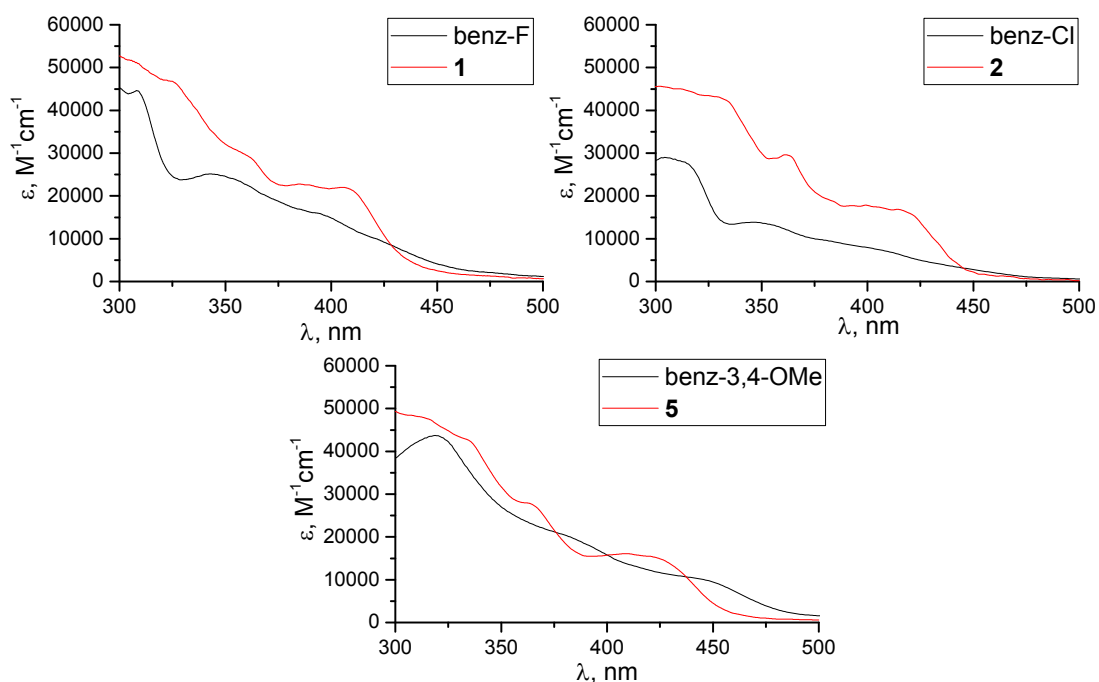

Figure S52. Comparison of absorption spectra of synthesized complexes (red) and benzimidazole-based complexes (black).

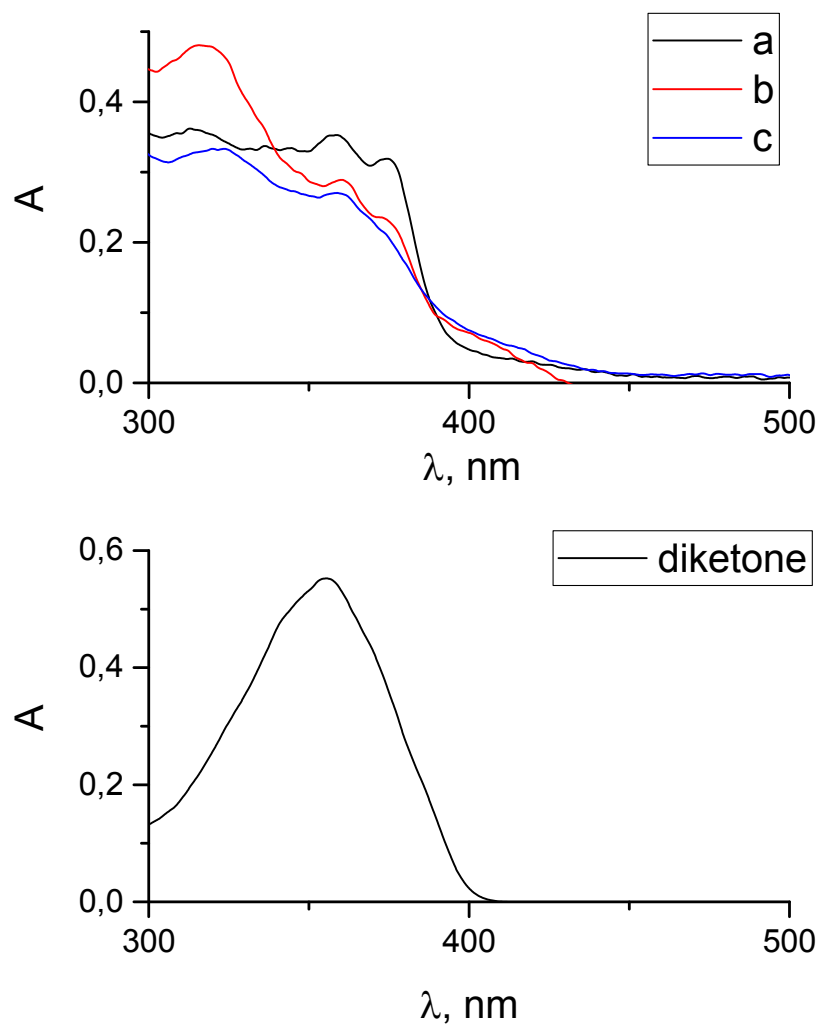

Figure S53. Comparison of absorption spectra of decomposition product of complex **3** in pure  $\text{CH}_2\text{Cl}_2$  (**a**) with its chloride precursor (**b**) and decomposition product of complex **3** upon addition of  $\text{CF}_3\text{SO}_3\text{H}$  and  $\text{NBu}_4\text{Cl}$  (**c**) (upper) and absorption spectra of the  $\beta$ -diketone (lower).

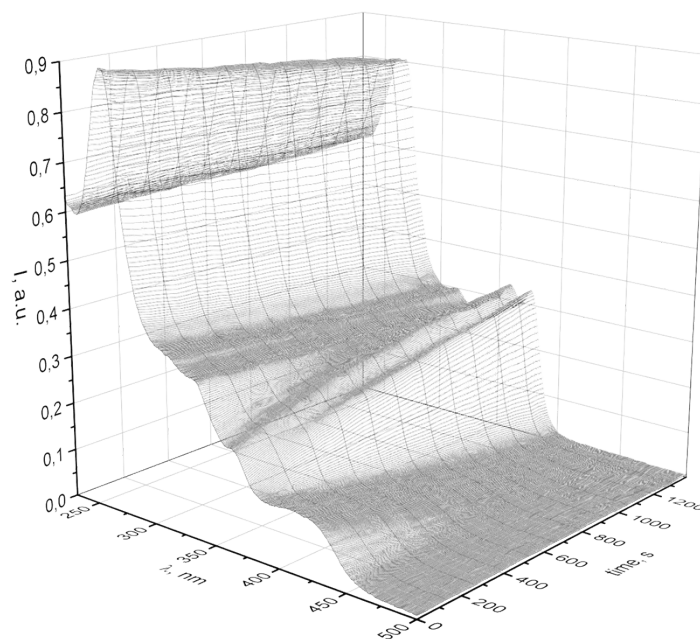

Figure S54. Changing of absorption spectra of complex **3** under continuous irradiation in time (measured in  $\text{CH}_2\text{Cl}_2$  at  $25^\circ\text{C}$ ).

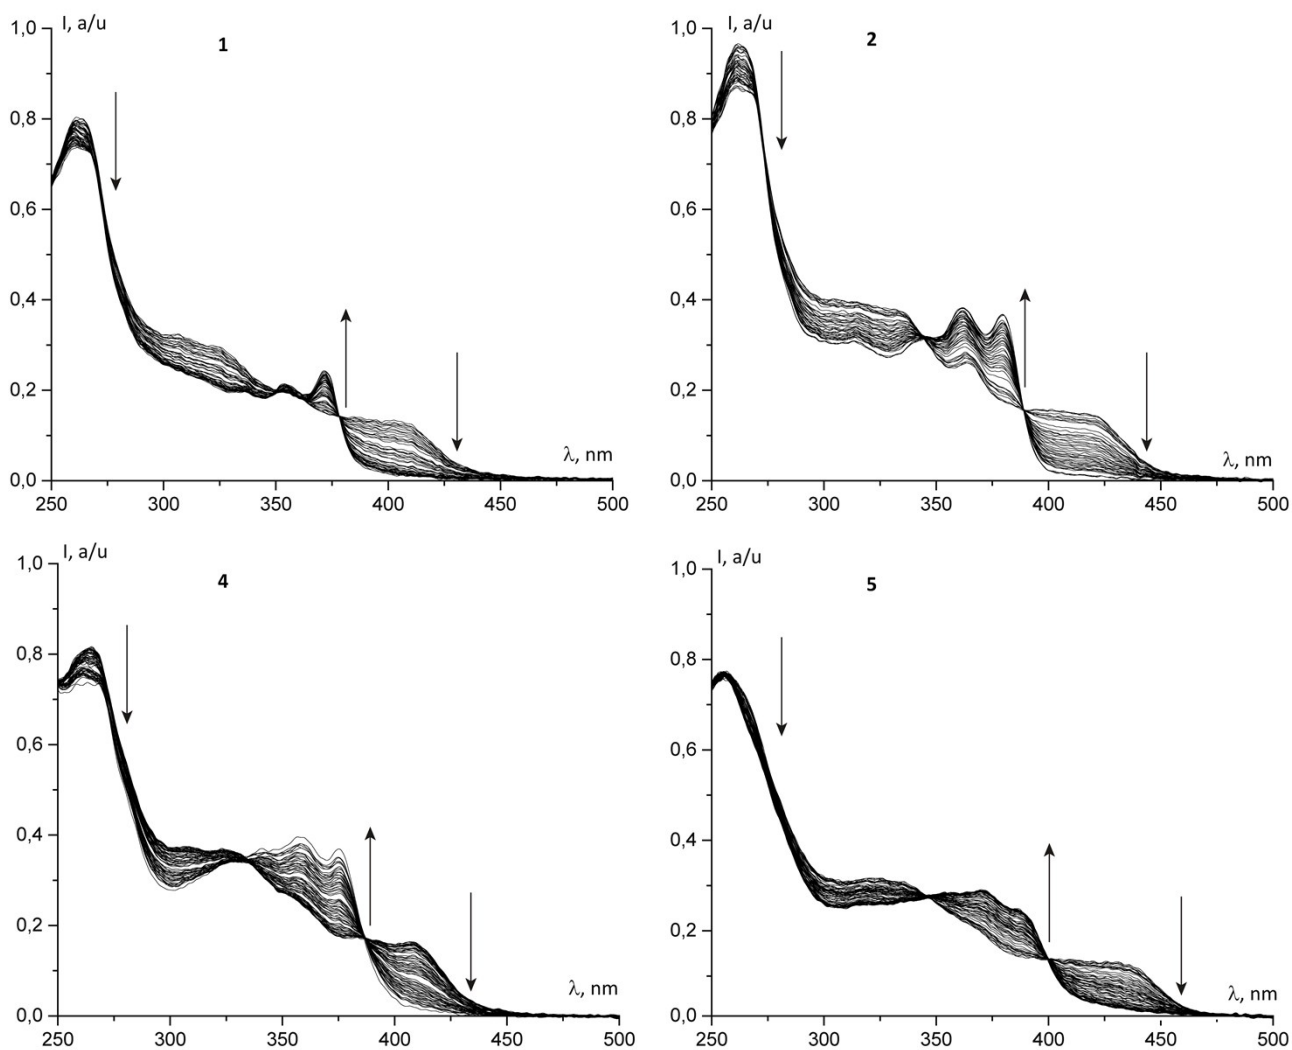

Figure S55. Changing of absorption spectra of complexes **1**, **2**, **4** and **5** under continuous irradiation (measured in  $\text{CH}_2\text{Cl}_2$  at  $25^\circ\text{C}$ ).

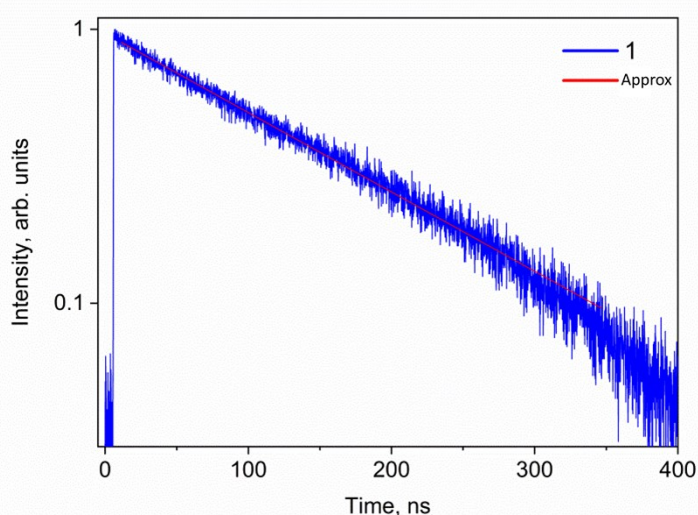

Figure S56. Photoluminescence decay curve of complex **1** with its approximation.

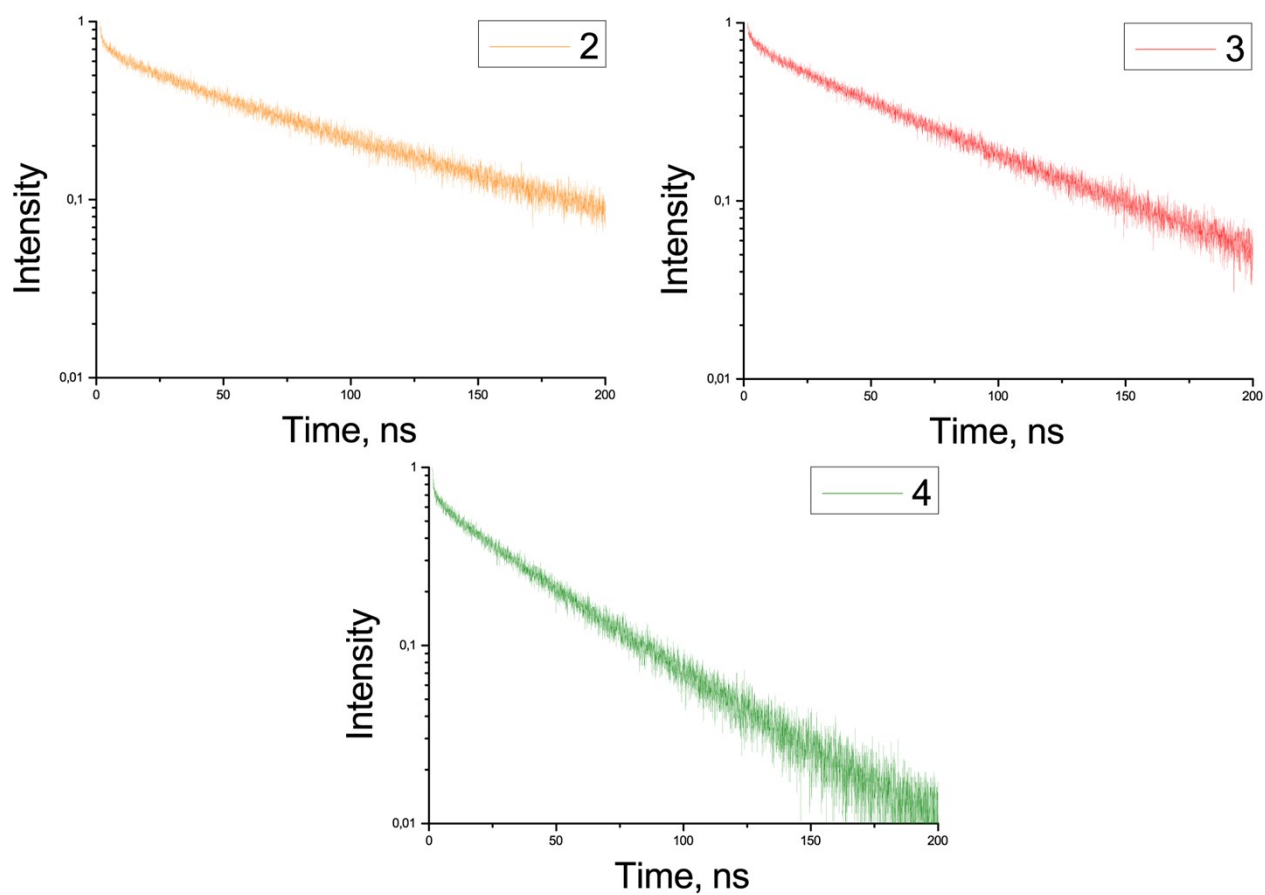

Figure S57. Photoluminescence decay curves of complexes 2 – 4. (for complex 5 it was unable to record a decay curve due to weak luminescence)

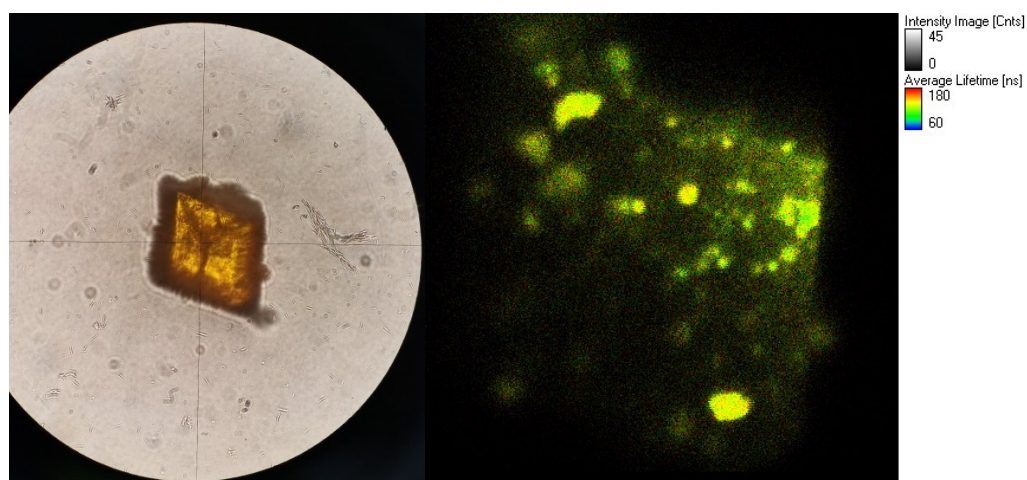

Figure S58. Mapping the surface of the selected crystallite (on the left) with spatial resolution by lifetime and luminescence intensity.

#### 4. Calculation details.

Table S7. Composition (%) of frontier molecular orbitals for **1** – **5**.

| complex |            | <b>1</b> | <b>2</b> | <b>3</b> | <b>4</b> | <b>5</b> |
|---------|------------|----------|----------|----------|----------|----------|
| HOMO    | Ir         | 43       | 43       | 48       | 38       | 38       |
|         | C^N        | 53       | 52       | 47       | 58       | 58       |
|         | O^O        | 4        | 5        | 5        | 4        | 4        |
|         | energy, eV | -4.97    | -5.00    | -4.79    | -4.71    | -4.55    |
| LUMO    | Ir         | 5        | 5        | 5        | 5        | 5        |
|         | C^N        | 11       | 11       | 11       | 11       | 11       |
|         | O^O        | 84       | 84       | 84       | 84       | 84       |
|         | energy, eV | -1.92    | -1.94    | -1.82    | -1.79    | -1.79    |

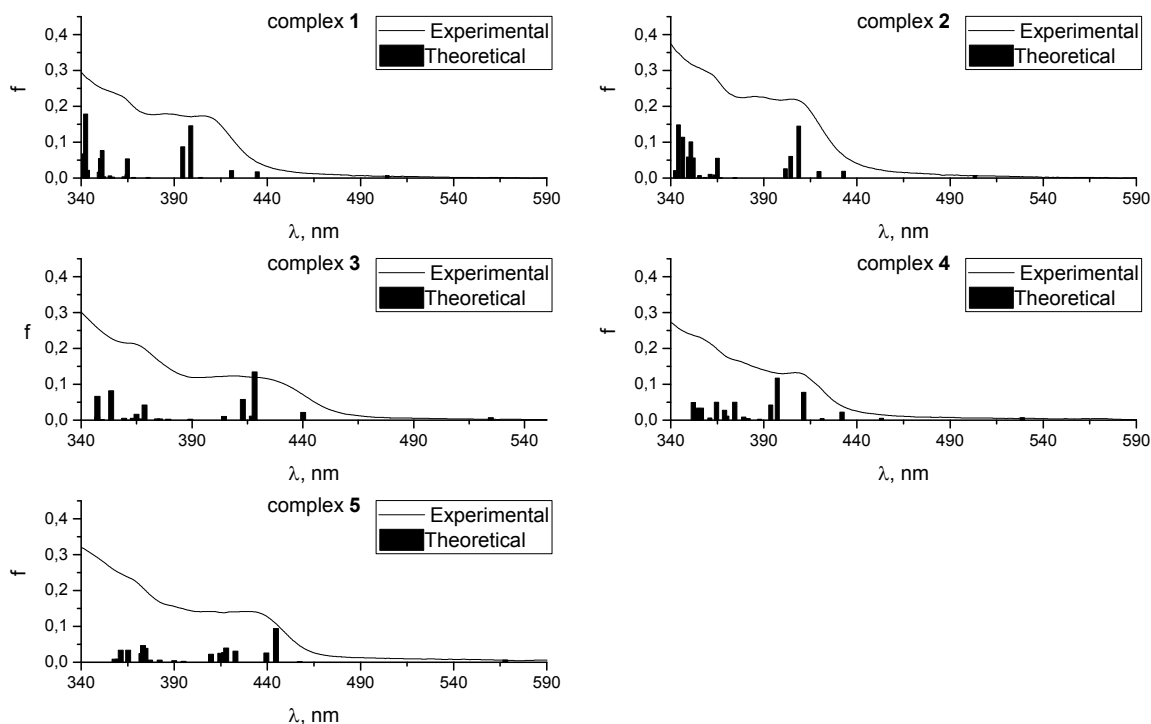

Figure S59. TDDFT electronic spectra of complexes **1**– **5**.

Table S8. Selected bond lengths in optimized structures of **1** – **5** at the ground and triplet excited states.

|                                            | <b>1</b>        | <b>2</b>        | <b>3</b>        | <b>4</b>        | <b>5</b>        |
|--------------------------------------------|-----------------|-----------------|-----------------|-----------------|-----------------|
| Ir – C1 (S <sub>0</sub> / T <sub>1</sub> ) | 1.9959 / 2.0103 | 1.9974 / 2.0110 | 1.9977 / 2.0125 | 1.9981 / 2.0132 | 1.9984 / 2.0094 |
| Ir – C2 (S <sub>0</sub> / T <sub>1</sub> ) | 1.9929 / 2.0038 | 1.9942 / 2.0050 | 1.9944 / 2.0057 | 1.9947 / 2.0068 | 1.9952 / 2.0027 |
| Ir – N1 (S <sub>0</sub> / T <sub>1</sub> ) | 2.0997 / 2.1005 | 2.0996 / 2.1002 | 2.0988 / 2.1014 | 2.0984 / 2.1001 | 2.0959 / 2.1015 |
| Ir – N2 (S <sub>0</sub> / T <sub>1</sub> ) | 2.0945 / 2.0944 | 2.0948 / 2.0945 | 2.0942 / 2.0942 | 2.0975 / 2.0965 | 2.1009 / 2.0978 |
| Ir – O1 (S <sub>0</sub> / T <sub>1</sub> ) | 2.1768 / 2.1287 | 2.1747 / 2.1282 | 2.1828 / 2.1247 | 2.1818 / 2.1248 | 2.1780 / 2.1187 |
| Ir – O2 (S <sub>0</sub> / T <sub>1</sub> ) | 2.1708 / 2.0897 | 2.1710 / 2.0892 | 2.1775 / 2.0791 | 2.1763 / 2.0821 | 2.1801 / 2.0748 |



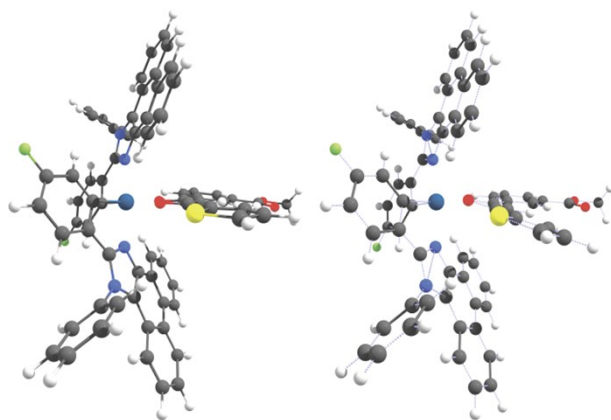

**1**

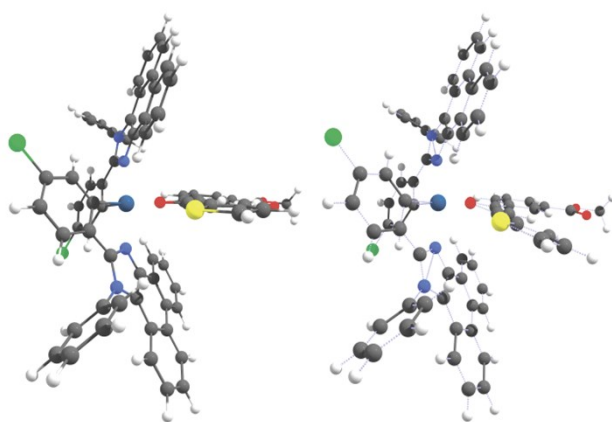

**2**

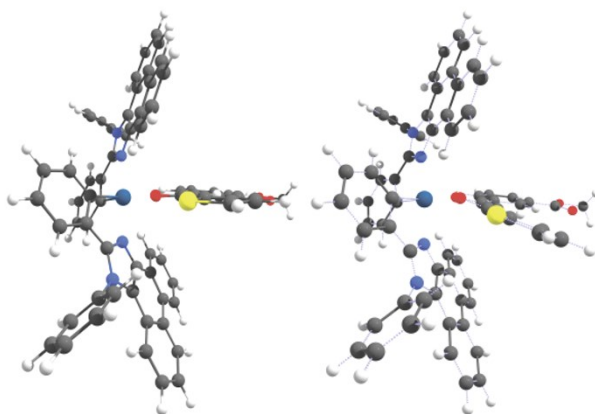

**3**

Figure S60a. Optimized geometries of S0(left) and T1(right) states of complexes **1** – **3**.

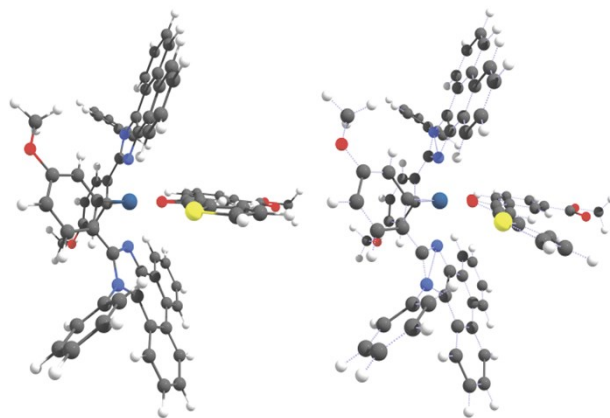

**4**

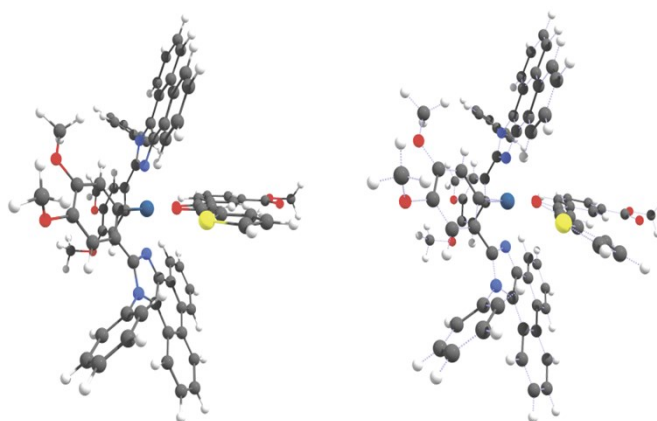

**5**

Figure S60b. Optimized geometries of S0(left) and T1(right) states of complexes **4** and **5**.

Table S9. TDDFT singlet excited states for **1** – **5**.

| Compound       | State          | $\lambda$ / nm ( <i>f</i> ) | Dominant monoexcitations                    |
|----------------|----------------|-----------------------------|---------------------------------------------|
| <b>1</b>       | S <sub>1</sub> | 504 (0.007)                 | H → L (97%)                                 |
|                | S <sub>2</sub> | 435 (0.02)                  | H-2 → L (56%), H-1 → L (40%)                |
|                | S <sub>3</sub> | 421 (0.02)                  | H-1 → L (59%), H-2 → L (39%)                |
|                | S <sub>5</sub> | 399 (0.15)                  | H → L+1 (66%), H → L+2 (10%)                |
|                | S <sub>6</sub> | 395 (0.09)                  | H → L+3 (67%), H → L+1 (16%)                |
|                | <b>2</b>       | S <sub>1</sub>              | 503 (0.007)                                 |
| S <sub>2</sub> |                | 432 (0.02)                  | H-2 → L (63%), H-1 → L (32%)                |
| S <sub>3</sub> |                | 420 (0.02)                  | H-1 → L (67%), H-2 → L (27%)                |
| S <sub>4</sub> |                | 409 (0.14)                  | H → L+1 (77%), H → L+2 (13%)                |
| S <sub>5</sub> |                | 404 (0.06)                  | H → L+2 (54%), H-3 → L (31%)                |
| <b>3</b>       |                | S <sub>1</sub>              | 524 (0.007)                                 |
|                | S <sub>2</sub> | 440 (0.02)                  | H-1 → L (95%)                               |
|                | S <sub>3</sub> | 418 (0.13)                  | H → L+1 (72%), H → L+2 (14%)                |
|                | S <sub>4</sub> | 416 (0.011)                 | H-2 → L (95%)                               |
|                | S <sub>5</sub> | 412 (0.06)                  | H → L+3 (36%), H → L+2 (33%), H → L+1 (14%) |
|                | <b>4</b>       | S <sub>1</sub>              | 529 (0.006)                                 |
| S <sub>3</sub> |                | 432 (0.02)                  | H-2 → L (77%), H-1 → L (13%)                |
| S <sub>5</sub> |                | 411 (0.08)                  | H → L+1 (55%), H → L+2 (29%)                |
| S <sub>6</sub> |                | 397 (0.12)                  | H → L+4 (61%), H → L+2 (17%), H → L+1 (14%) |
| S <sub>7</sub> |                | 394 (0.04)                  | H → L+2 (47%), H → L+4 (27%), H → L+1 (21%) |
| <b>5</b>       |                | S <sub>1</sub>              | 568 (0.006)                                 |
|                | S <sub>3</sub> | 444 (0.09)                  | H → L+1 (87%)                               |
|                | S <sub>4</sub> | 439 (0.03)                  | H-2 → L (84%), H-1 → L (11%),               |
|                | S <sub>5</sub> | 423 (0.03)                  | H → L+3 (45%), H → L+4 (39%)                |
|                | S <sub>6</sub> | 418 (0.04)                  | H → L+2 (66%), H → L+5 (23%)                |

Only the singlet states in the visible spectral range are included. H = HOMO, L = LUMO.

All excitations are of combined MLCT / LLCT character. MLCT – metal-to-ligand charge transfer, LLCT – ligand-to-ligand charge transfer.

Table S10. Spin density distribution (%) for complexes **1** – **5** at their T<sub>1</sub> states.

| complex |                  | <b>1</b> | <b>2</b> | <b>3</b> | <b>4</b> | <b>5</b> |
|---------|------------------|----------|----------|----------|----------|----------|
| moiety  | Ir               | 14       | 14       | 18       | 17       | 20       |
|         | O <sup>^</sup> O | 83       | 82       | 76       | 78       | 70       |
|         | C <sup>^</sup> N | 3        | 4        | 6        | 5        | 10       |

Table S11. Calculated emission wavelength for complexes **1** – **5** from the triplet excited state (calculated as  $\lambda = hc/\Delta E$ , where  $\Delta E$  is E(T<sub>1</sub>)-E(S<sub>0</sub> in T<sub>1</sub> geometry)

| complex        | <b>1</b> | <b>2</b> | <b>3</b> | <b>4</b> | <b>5</b> |
|----------------|----------|----------|----------|----------|----------|
| $\lambda$ , nm | 658      | 657      | 697      | 687      | 727      |
